# Supplementary material
Source: PubMed Central journal article supplement (PMC7940589)
Supplement: NIHMS1666248-supplement-Supplemental_Publication_Material.pdf [file NIHMS1666248-supplement-Supplemental_Publication_Material.pdf]

## SUPPLEMENTAL MATERIAL

**Supplemental Table I** Blood pressure treatment cutoffs by guideline for adults less than age 70

| <i>CVD Risk</i> | <i>Blood Pressure Thresholds</i><br>Systolic blood pressure/Diastolic blood pressure |               |             |                   |
|-----------------|--------------------------------------------------------------------------------------|---------------|-------------|-------------------|
|                 | <b>ACC/AHA</b>                                                                       | <b>140/90</b> | <b>NICE</b> | <b>WHO HEARTS</b> |
| <b>&lt;10%</b>  | 140/90                                                                               | 140/90        | 160/100     | 160/100           |
| <b>10-20%</b>   | 130/80                                                                               | 140/90        | 140/90      | 160/100           |
| <b>20-30%</b>   | 130/80                                                                               | 140/90        | 140/90      | 140/90            |
| <b>&gt;30%</b>  | 130/80                                                                               | 140/90        | 140/90      | 130/80            |

Abbreviations: ACC/AHA = American College of Cardiology/American Heart Association; NICE = United Kingdom's National Institute for Health and Care Excellence; WHO HEARTS = World Health Organization Hearts/Package of Essential Noncommunicable disease interventions

**Supplemental Table II: Blood pressure measurement details**

| Country      | Measurement device                                                          | Number of measurements                                                 | Interval between measurements                                                                                                |
|--------------|-----------------------------------------------------------------------------|------------------------------------------------------------------------|------------------------------------------------------------------------------------------------------------------------------|
| Algeria      | Not specified                                                               | 3                                                                      | Not specified                                                                                                                |
| Azerbaijan   | Not specified                                                               | 3                                                                      | Not specified                                                                                                                |
| Belarus      | Boso-Medicus Uno                                                            | 3                                                                      | 3 minutes                                                                                                                    |
| Belize       | Omron Digital Monitor<br>HEM-712C                                           | 3                                                                      | 5 minutes                                                                                                                    |
| Benin        | Boso-Medicus Uno                                                            | 3                                                                      | 3 minutes                                                                                                                    |
| Bhutan       | Boso Medicus Control                                                        | 3                                                                      | 3 minutes                                                                                                                    |
| Botswana     | Not specified                                                               | 3                                                                      | Not specified                                                                                                                |
| Burkina Faso | Omron Digital Monitor<br>HEM-705CP                                          | 3                                                                      | 10 minutes                                                                                                                   |
| Brazil       | G-TECH Model MA 100                                                         | 3                                                                      | 2 minutes                                                                                                                    |
| Cambodia     | NISSEI Digital Blood Pressure<br>Monitor (Model DS-500)                     | 3                                                                      | Not specified                                                                                                                |
| Chile        | Omron Digital Monitor<br>HEM-742                                            | 3                                                                      | 2 minutes                                                                                                                    |
| China        | Manual mercury<br>sphygmomanometer                                          | 3                                                                      | 10 minutes                                                                                                                   |
| Comoros      | Digital upper arm meter (model<br>not specified)                            | 2                                                                      | 5-10 minutes                                                                                                                 |
| Costa Rica   | Digital upper arm meter (Welch<br>Allyn and Omron, models not<br>specified) | 2 with a third measurement<br>if the first two differed by<br>>10 mmHg | 5 minutes                                                                                                                    |
| Ecuador      | Digital upper arm meter (model<br>not specified)                            | 2 with a third measurement<br>if the first two differed by >5<br>mmHg  | 5 minutes                                                                                                                    |
| Eswatini     | Boso Medicus PC (model not<br>specified)                                    | 3                                                                      | 3-5 minutes                                                                                                                  |
| Georgia      | Boso Medicus Uno                                                            | 3                                                                      | 3 minutes                                                                                                                    |
| Ghana        | Boso Medistar wrist Blood<br>Pressure Monitor Model S                       | 3                                                                      | 1 minute                                                                                                                     |
| Grenada      | Omron Digital Monitor M4 - I                                                | 3                                                                      | 3 minutes                                                                                                                    |
| Guyana       | Omron digital upper arm meter<br>(model not specified)                      | 3                                                                      | 3 minutes                                                                                                                    |
| India        | Rossmax AW150                                                               | 2                                                                      | 10 minutes                                                                                                                   |
| Indonesia    | Omron Digital Monitor<br>HEM-7203                                           | 3                                                                      | First measurement<br>taken at beginning<br>of interview,<br>subsequent two<br>taken during the<br>course of the<br>interview |
| Iraq         | Manual mercury<br>sphygmomanometer                                          | 3                                                                      | Not specified                                                                                                                |
| Iran         | Beurer medical, type: BM 20                                                 | 3                                                                      | 5 minutes                                                                                                                    |
| Kazakhstan   | Microlife A80                                                               | 3                                                                      | 1 minute                                                                                                                     |
| Kenya        | Omron M2 Digital Monitor                                                    | 3                                                                      | 3-5 minutes                                                                                                                  |
| Kyrgyzstan   | Not specified                                                               | 3                                                                      | Not specified                                                                                                                |
| Lebanon      | Omron M6 comfort                                                            | 3                                                                      | Not specified                                                                                                                |
| Lesotho      | Omron M3W Digital Monitor                                                   | 3                                                                      | 10 minutes                                                                                                                   |
| Liberia      | Omron digital upper arm meter<br>(model not specified)                      | 3                                                                      | Not specified                                                                                                                |
| Mexico       | Omron digital upper arm meter<br>(model not specified)                      | 2                                                                      | Not specified                                                                                                                |

|                                |                                                     |                                                                  |                                                                              |
|--------------------------------|-----------------------------------------------------|------------------------------------------------------------------|------------------------------------------------------------------------------|
| Moldova                        | Boso-Medicus Uno                                    | 3                                                                | 3 minutes                                                                    |
| Mongolia                       | Omron M5 Digital Monitor                            | 3                                                                | 3 minutes                                                                    |
| Morocco                        | Spengler ES 60                                      | 3                                                                | Not specified                                                                |
| Mozambique                     | Omron 3 Series Digital Monitor                      | 2 with a third measurement if the first two differed by >10 mmHg | 1 minute                                                                     |
| Myanmar                        | Boso Medicus Uno                                    | 3                                                                | 3-5 minutes                                                                  |
| Namibia                        | Life Source Digital Monitor Model UA-767            | 3                                                                | Not specified                                                                |
| Nepal                          | Omron digital upper arm meter (model not specified) | 3                                                                | 3 minutes                                                                    |
| Seychelles                     | Omron M3 Digital Monitor                            | 5                                                                | Once upon arrival, three times during the interview, and once before leaving |
| South Africa                   | Omron M7 Digital Monitor                            | 2                                                                | 5 minutes                                                                    |
| Sri Lanka                      | Not specified                                       | 3                                                                | Not specified                                                                |
| Sudan                          | Not specified                                       | 3                                                                | Not specified                                                                |
| St. Vincent and the Grenadines | Omron Digital Monitor M4 - I                        | 3                                                                | 3 minutes                                                                    |
| Tajikistan                     | Not specified                                       | 3                                                                | Not specified                                                                |
| Tanzania                       | Omron digital upper arm meter (model not specified) | 3                                                                | Not specified                                                                |
| Timor-Leste                    | Omron digital upper arm meter (model not specified) | 3                                                                | 2 minutes                                                                    |
| Togo                           | Omron digital upper arm meter (model not specified) | 3                                                                | 5 minutes                                                                    |
| Uganda                         | Boso Medicus Uno                                    | 3                                                                | 3-5 minutes                                                                  |
| Vanuatu                        | Omron M4                                            | 3                                                                | 2-3 minutes                                                                  |
| Zanzibar                       | Omron M2 Digital Monitor                            | 3                                                                | 5 minutes                                                                    |

**Supplemental Table III: Numerical results for Figure 1**

|               | Undiagnosed |              | Diagnosed,<br>not taking medicines |            | Diagnosed,<br>taking medicines |            |
|---------------|-------------|--------------|------------------------------------|------------|--------------------------------|------------|
|               | %           | 95% CI       | %                                  | 95% CI     | %                              | 95% CI     |
| <b>Female</b> |             |              |                                    |            |                                |            |
| ACC/AHA       | 20.1        | (19.7, 20.6) | 2.3                                | (2.2, 2.4) | 5.3                            | (5.0, 5.5) |
| 140/90        | 19.0        | (18.5, 19.4) | 2.2                                | (2.1, 2.4) | 5.0                            | (4.7, 5.2) |
| NICE          | 7.2         | (6.9, 7.5)   | 1.3                                | (1.2, 1.4) | 3.3                            | (3.1, 3.5) |
| WHO Hearts    | 5.6         | (5.4, 5.9)   | 1.1                                | (1.0, 1.2) | 2.5                            | (2.3, 2.7) |
| <b>Male</b>   |             |              |                                    |            |                                |            |
| ACC/AHA       | 28.4        | (27.7, 29.1) | 2.0                                | (1.9, 2.2) | 4.6                            | (4.3, 4.9) |
| 140/90        | 25.2        | (24.5, 25.9) | 1.9                                | (1.7, 2.1) | 4.1                            | (3.8, 4.4) |
| NICE          | 11.3        | (10.9, 11.8) | 1.3                                | (1.2, 1.5) | 3.1                            | (2.8, 3.3) |
| WHO Hearts    | 8.0         | (7.6, 8.3)   | 1.0                                | (0.9, 1.2) | 2.1                            | (1.9, 2.3) |

Abbreviations: ACC/AHA = American College of Cardiology/American Heart Association; NICE = United Kingdom's National Institute for Health and Care Excellence; WHO Hearts = World Health Organization Hearts/Package of Essential Noncommunicable disease interventions.



**Supplemental Table IV: Numerical results for Figure 3**

|               |              |            | Undiagnosed |             | Diagnosed,<br>not taking medicines |            | Diagnosed,<br>taking medicines |            |
|---------------|--------------|------------|-------------|-------------|------------------------------------|------------|--------------------------------|------------|
|               |              |            | %           | 95% CI      | %                                  | 95% CI     | %                              | 95% CI     |
| <b>Female</b> |              |            |             |             |                                    |            |                                |            |
| Africa        | Algeria      | ACC/AHA    | 17.2        | (15.8,18.6) | 6.3                                | (5.5, 7.1) | 8.7                            | (7.8, 9.5) |
|               |              | 140/90     | 14.9        | (13.6,16.3) | 5.9                                | (5.1, 6.7) | 7.3                            | (6.5, 8.1) |
|               |              | NICE       | 6.4         | (5.6, 7.2)  | 3.3                                | (2.7, 3.9) | 6.1                            | (5.4, 6.9) |
|               |              | WHO Hearts | 3.6         | (2.9, 4.2)  | 2.2                                | (1.7, 2.7) | 3.8                            | (3.2, 4.4) |
|               | Benin        | ACC/AHA    | 27.0        | (21.0,33.0) | 2.9                                | (1.7, 4.2) | 3.9                            | (2.7, 5.1) |
|               |              | 140/90     | 27.0        | (21.0,33.0) | 2.9                                | (1.7, 4.2) | 3.8                            | (2.6, 5.0) |
|               |              | NICE       | 12.9        | (9.8,16.0)  | 2.1                                | (1.1, 3.1) | 3.3                            | (2.2, 4.4) |
|               |              | WHO Hearts | 12.6        | (9.5,15.8)  | 2.1                                | (1.1, 3.1) | 3.1                            | (2.0, 4.2) |
|               | Botswana     | ACC/AHA    | 16.4        | (14.2,18.7) | 10.2                               | (8.4,11.9) | 11.0                           | (8.4,13.7) |
|               |              | 140/90     | 15.5        | (13.4,17.7) | 10.1                               | (8.3,11.9) | 11.0                           | (8.4,13.6) |
|               |              | NICE       | 6.3         | (5.0, 7.6)  | 5.2                                | (3.9, 6.6) | 4.9                            | (3.6, 6.2) |
|               |              | WHO Hearts | 5.7         | (4.4, 6.9)  | 5.1                                | (3.7, 6.4) | 4.7                            | (3.4, 6.0) |
|               | Burkina Faso | ACC/AHA    | 16.7        | (14.4,19.1) | 2.7                                | (1.6, 3.7) | 2.4                            | (1.1, 3.7) |
|               |              | 140/90     | 16.8        | (14.4,19.1) | 2.7                                | (1.6, 3.7) | 2.4                            | (1.1, 3.7) |
|               |              | NICE       | 4.6         | (3.1, 6.1)  | 1.3                                | (0.6, 2.0) | 1.7                            | (0.5, 2.8) |
|               |              | WHO Hearts | 4.6         | (3.1, 6.1)  | 1.3                                | (0.6, 2.0) | 1.7                            | (0.5, 2.8) |
|               | Comoros      | ACC/AHA    | 20.1        | (18.6,21.5) | 5.5                                | (4.7, 6.4) | 4.6                            | (3.9, 5.4) |
|               |              | 140/90     | 20.0        | (18.5,21.5) | 5.5                                | (4.7, 6.4) | 4.6                            | (3.9, 5.4) |
|               |              | NICE       | 7.1         | (6.2, 8.1)  | 2.9                                | (2.2, 3.5) | 2.7                            | (2.2, 3.3) |
|               |              | WHO Hearts | 7.0         | (6.1, 8.0)  | 2.9                                | (2.2, 3.5) | 2.7                            | (2.1, 3.3) |
|               | Eswatini     | ACC/AHA    | 17.3        | (14.7,20.0) | 10.8                               | (8.5,13.2) | 9.1                            | (7.4,10.9) |
|               |              | 140/90     | 17.1        | (14.5,19.8) | 10.8                               | (8.5,13.2) | 8.9                            | (7.2,10.7) |
|               |              | NICE       | 5.8         | (4.3, 7.4)  | 5.7                                | (4.0, 7.5) | 5.8                            | (4.3, 7.3) |

|            |            |      |             |     |            |      |             |
|------------|------------|------|-------------|-----|------------|------|-------------|
|            | WHO Hearts | 5.4  | (3.9, 6.9)  | 5.6 | (3.9, 7.4) | 5.3  | (3.9, 6.8)  |
| Ghana      | ACC/AHA    | 33.2 | (28.2,38.2) | 3.6 | (1.6, 5.7) | 3.9  | (2.5, 5.3)  |
|            | 140/90     | 33.0 | (28.0,38.1) | 3.6 | (1.6, 5.7) | 3.9  | (2.5, 5.2)  |
|            | NICE       | 16.2 | (12.4,19.9) | 1.9 | (0.4, 3.4) | 2.6  | (1.5, 3.8)  |
| Kenya      | WHO Hearts | 15.5 | (11.8,19.2) | 1.9 | (0.4, 3.4) | 2.5  | (1.3, 3.6)  |
|            | ACC/AHA    | 21.1 | (18.7,23.5) | 7.0 | (5.6, 8.4) | 2.7  | (1.5, 4.0)  |
|            | 140/90     | 21.1 | (18.7,23.5) | 7.0 | (5.6, 8.3) | 2.7  | (1.5, 4.0)  |
|            | NICE       | 7.1  | (5.5, 8.7)  | 3.6 | (2.5, 4.6) | 1.3  | (0.7, 1.9)  |
| Lesotho    | WHO Hearts | 6.9  | (5.2, 8.5)  | 3.5 | (2.4, 4.5) | 1.3  | (0.7, 1.9)  |
|            | ACC/AHA    | 27.4 | (23.7,31.1) | 7.8 | (5.8, 9.9) | 9.2  | (7.2,11.2)  |
|            | 140/90     | 27.4 | (23.7,31.1) | 7.8 | (5.8, 9.9) | 9.2  | (7.2,11.2)  |
|            | NICE       | 10.2 | (7.9,12.5)  | 4.1 | (2.9, 5.3) | 6.5  | (4.9, 8.1)  |
| Liberia    | WHO Hearts | 10.2 | (7.9,12.5)  | 4.1 | (2.9, 5.3) | 6.4  | (4.7, 8.0)  |
|            | ACC/AHA    | 26.9 | (22.7,31.0) | 3.9 | (1.9, 5.9) | 6.0  | (3.8, 8.2)  |
|            | 140/90     | 26.9 | (22.7,31.0) | 3.9 | (1.9, 5.9) | 6.0  | (3.8, 8.2)  |
|            | NICE       | 11.5 | (8.2,14.9)  | 2.0 | (0.8, 3.2) | 4.1  | (2.2, 6.0)  |
| Mozambique | WHO Hearts | 11.5 | (8.2,14.9)  | 2.0 | (0.8, 3.2) | 4.1  | (2.2, 6.0)  |
|            | ACC/AHA    | 32.5 | (28.7,36.4) | 2.5 | (1.6, 3.4) | 2.6  | (1.5, 3.6)  |
|            | 140/90     | 32.5 | (28.7,36.4) | 2.5 | (1.6, 3.4) | 2.6  | (1.5, 3.6)  |
|            | NICE       | 15.1 | (11.9,18.3) | 1.9 | (1.1, 2.7) | 1.5  | (0.8, 2.1)  |
| Namibia    | WHO Hearts | 14.0 | (10.9,17.1) | 1.9 | (1.1, 2.7) | 1.5  | (0.8, 2.1)  |
|            | ACC/AHA    | 19.8 | (17.2,22.5) | 3.2 | (2.1, 4.2) | 8.4  | (7.1, 9.8)  |
|            | 140/90     | 19.2 | (16.6,21.8) | 3.2 | (2.1, 4.2) | 8.2  | (6.9, 9.6)  |
|            | NICE       | 5.0  | (3.8, 6.2)  | 1.6 | (0.8, 2.5) | 4.0  | (3.1, 5.0)  |
| Seychelles | WHO Hearts | 4.5  | (3.3, 5.6)  | 1.5 | (0.7, 2.4) | 3.9  | (2.9, 4.8)  |
|            | ACC/AHA    | 11.6 | (9.4,13.8)  | 3.6 | (2.1, 5.0) | 12.8 | (10.6,15.1) |
|            | 140/90     | 11.6 | (9.4,13.8)  | 3.6 | (2.1, 5.0) | 12.6 | (10.3,14.8) |
|            | NICE       | 2.4  | (1.3, 3.6)  | 2.1 | (0.8, 3.4) | 4.5  | (3.0, 5.9)  |
|            | WHO Hearts | 2.4  | (1.3, 3.6)  | 2.1 | (0.8, 3.4) | 3.8  | (2.4, 5.1)  |

|          |              |            |             |             |            |            |            |            |
|----------|--------------|------------|-------------|-------------|------------|------------|------------|------------|
| Americas | South Africa | ACC/AHA    | 14.8        | (13.3,16.2) | 1.4        | (1.0, 1.9) | 8.1        | (7.2, 9.0) |
|          |              | 140/90     | 14.6        | (13.1,16.0) | 1.4        | (1.0, 1.9) | 7.9        | (7.0, 8.7) |
|          |              | NICE       | 4.8         | (4.1, 5.6)  | 0.8        | (0.5, 1.2) | 4.3        | (3.6, 5.0) |
|          |              | WHO Hearts | 4.4         | (3.7, 5.2)  | 0.8        | (0.4, 1.1) | 3.4        | (2.8, 4.0) |
|          | Tanzania     | ACC/AHA    | 26.5        | (23.0,30.1) | 5.2        | (3.6, 6.7) | 2.4        | (1.7, 3.0) |
|          |              | 140/90     | 26.5        | (23.0,30.1) | 5.1        | (3.6, 6.6) | 2.4        | (1.7, 3.1) |
|          |              | NICE       | 10.2        | (7.9,12.5)  | 3.1        | (2.1, 4.2) | 1.7        | (1.1, 2.2) |
|          |              | WHO Hearts | 10.1        | (7.8,12.4)  | 3.1        | (2.1, 4.2) | 1.7        | (1.1, 2.2) |
|          | Togo         | ACC/AHA    | 19.6        | (16.9,22.3) | 6.6        | (4.7, 8.5) | 2.3        | (1.2, 3.4) |
|          |              | 140/90     | 19.6        | (16.9,22.3) | 6.6        | (4.7, 8.5) | 2.3        | (1.2, 3.4) |
|          |              | NICE       | 8.0         | (5.9,10.1)  | 2.7        | (1.6, 3.9) | 1.7        | (0.8, 2.6) |
|          |              | WHO Hearts | 7.8         | (5.7, 9.9)  | 2.7        | (1.6, 3.9) | 1.7        | (0.8, 2.6) |
|          | Uganda       | ACC/AHA    | 22.3        | (19.5,25.1) | 5.1        | (3.4, 6.7) | 3.0        | (1.9, 4.0) |
|          |              | 140/90     | 22.3        | (19.5,25.1) | 5.1        | (3.4, 6.7) | 3.0        | (1.9, 4.0) |
|          |              | NICE       | 7.5         | (5.8, 9.2)  | 2.7        | (1.7, 3.7) | 2.2        | (1.3, 3.0) |
|          |              | WHO Hearts | 7.2         | (5.5, 9.0)  | 2.6        | (1.6, 3.5) | 2.2        | (1.3, 3.0) |
| Zambia   | ACC/AHA      | 12.6       | (10.7,14.4) | 6.4         | (4.9, 7.9) | 3.9        | (2.8, 5.0) |            |
|          | 140/90       | 12.6       | (10.7,14.4) | 6.4         | (4.9, 7.8) | 3.9        | (2.8, 5.0) |            |
|          | NICE         | 3.4        | (2.6, 4.3)  | 3.6         | (2.4, 4.8) | 2.4        | (1.4, 3.5) |            |
|          | WHO Hearts   | 3.1        | (2.2, 3.9)  | 3.4         | (2.2, 4.6) | 2.2        | (1.3, 3.2) |            |
| Belize   | ACC/AHA      | 8.1        | (6.0,10.1)  | 3.1         | (1.8, 4.4) | 3.2        | (2.2, 4.2) |            |
|          | 140/90       | 8.0        | (6.0,10.1)  | 3.1         | (1.8, 4.4) | 3.2        | (2.2, 4.2) |            |
|          | NICE         | 1.5        | (0.7, 2.4)  | 0.9         | (0.3, 1.5) | 1.5        | (0.8, 2.2) |            |
|          | WHO Hearts   | 1.2        | (0.4, 1.9)  | 0.9         | (0.3, 1.5) | 1.2        | (0.6, 1.9) |            |
| Brazil   | ACC/AHA      | 10.2       | (9.5,11.0)  | 2.3         | (1.9, 2.6) | 9.7        | (9.0,10.4) |            |
|          | 140/90       | 10.2       | (9.4,10.9)  | 2.3         | (1.9, 2.6) | 9.7        | (9.0,10.3) |            |
|          | NICE         | 2.6        | (2.2, 3.1)  | 0.9         | (0.7, 1.1) | 3.8        | (3.4, 4.2) |            |
|          | WHO Hearts   | 2.6        | (2.1, 3.0)  | 0.9         | (0.7, 1.1) | 3.7        | (3.2, 4.1) |            |
| Chile    | ACC/AHA      | 6.0        | (4.4, 7.5)  | 7.6         | (5.3, 9.9) | 6.6        | (4.8, 8.3) |            |

|                          |                                 |            |      |             |     |             |      |             |
|--------------------------|---------------------------------|------------|------|-------------|-----|-------------|------|-------------|
|                          |                                 | 140/90     | 5.9  | (4.4, 7.5)  | 7.3 | (5.0, 9.6)  | 6.1  | (4.4, 7.9)  |
|                          |                                 | NICE       | 1.7  | (1.0, 2.5)  | 3.2 | (1.2, 5.1)  | 3.1  | (1.9, 4.3)  |
|                          |                                 | WHO Hearts | 1.4  | (0.7, 2.1)  | 2.5 | (0.7, 4.4)  | 2.7  | (1.5, 3.9)  |
|                          | Costa Rica                      | ACC/AHA    | 5.8  | (4.0, 7.5)  | 1.7 | (0.8, 2.5)  | 8.5  | (6.6,10.4)  |
|                          |                                 | 140/90     | 5.7  | (4.0, 7.5)  | 1.6 | (0.8, 2.5)  | 8.5  | (6.6,10.4)  |
|                          |                                 | NICE       | 1.9  | (0.7, 3.0)  | 0.6 | (0.2, 1.1)  | 2.3  | (1.3, 3.3)  |
|                          |                                 | WHO Hearts | 1.9  | (0.7, 3.0)  | 0.6 | (0.2, 1.0)  | 2.2  | (1.2, 3.2)  |
|                          | Ecuador                         | ACC/AHA    | 7.0  | (2.3,11.6)  | 4.0 | (2.6, 5.4)  | 4.8  | (2.0, 7.5)  |
|                          |                                 | 140/90     | 7.0  | (2.3,11.6)  | 4.0 | (2.6, 5.4)  | 4.8  | (2.0, 7.5)  |
|                          |                                 | NICE       | 3.2  | (-3.2, 9.7) | 2.6 | (-0.3, 5.5) | 2.4  | (-1.1, 5.9) |
|                          |                                 | WHO Hearts | 3.2  | (-3.3, 9.7) | 2.6 | (-0.3, 5.5) | 2.4  | (-1.1, 5.9) |
|                          | Grenada                         | ACC/AHA    | 12.3 | (9.2,15.4)  | 5.9 | (4.0, 7.8)  | 18.2 | (14.9,21.5) |
|                          |                                 | 140/90     | 12.3 | (9.2,15.4)  | 5.9 | (4.0, 7.8)  | 18.2 | (14.9,21.5) |
|                          |                                 | NICE       | 3.9  | (2.1, 5.7)  | 2.4 | (1.1, 3.8)  | 9.2  | (6.5,12.0)  |
|                          |                                 | WHO Hearts | 3.8  | (1.9, 5.6)  | 2.4 | (1.1, 3.8)  | 8.5  | (5.9,11.1)  |
|                          | Guyana                          | ACC/AHA    | 11.8 | (9.3,14.3)  | 6.6 | (4.6, 8.7)  | 9.5  | (7.6,11.3)  |
|                          |                                 | 140/90     | 11.8 | (9.3,14.3)  | 6.6 | (4.6, 8.6)  | 9.4  | (7.6,11.3)  |
|                          |                                 | NICE       | 3.5  | (2.3, 4.7)  | 2.6 | (1.5, 3.8)  | 4.8  | (3.3, 6.2)  |
|                          |                                 | WHO Hearts | 3.1  | (1.9, 4.2)  | 2.5 | (1.4, 3.7)  | 3.9  | (2.6, 5.3)  |
|                          | Mexico                          | ACC/AHA    | 14.5 | (12.5,16.5) | 1.8 | (1.1, 2.4)  | 6.2  | (4.9, 7.4)  |
|                          |                                 | 140/90     | 14.5 | (12.5,16.5) | 1.8 | (1.1, 2.4)  | 6.1  | (4.9, 7.3)  |
|                          |                                 | NICE       | 3.9  | (2.9, 5.0)  | 0.5 | (0.1, 0.8)  | 2.6  | (1.9, 3.3)  |
|                          |                                 | WHO Hearts | 3.8  | (2.8, 4.8)  | 0.5 | (0.1, 0.8)  | 2.5  | (1.8, 3.2)  |
|                          | St. Vincent &<br>the Grenadines | ACC/AHA    | 10.5 | (8.5,12.5)  | 6.4 | (5.1, 7.6)  | 12.1 | (10.0,14.2) |
|                          |                                 | 140/90     | 10.5 | (8.5,12.5)  | 6.4 | (5.1, 7.6)  | 11.9 | (9.8,14.0)  |
|                          |                                 | NICE       | 3.3  | (2.2, 4.4)  | 2.4 | (1.6, 3.2)  | 6.0  | (4.2, 7.8)  |
|                          |                                 | WHO Hearts | 2.9  | (1.9, 3.9)  | 2.4 | (1.6, 3.2)  | 5.3  | (3.6, 7.0)  |
| Eastern<br>Mediterranean | Iran                            | ACC/AHA    | 13.1 | (12.4,13.7) | 6.0 | (5.6, 6.4)  | 6.7  | (6.3, 7.1)  |

|  |            |            |      |             |      |             |      |             |
|--|------------|------------|------|-------------|------|-------------|------|-------------|
|  |            | 140/90     | 10.6 | (9.9,11.2)  | 5.2  | (4.8, 5.5)  | 5.9  | (5.4, 6.3)  |
|  |            | NICE       | 4.7  | (4.3, 5.1)  | 3.4  | (3.1, 3.7)  | 4.7  | (4.3, 5.0)  |
|  |            | WHO Hearts | 2.4  | (2.1, 2.7)  | 2.1  | (1.9, 2.3)  | 2.8  | (2.5, 3.1)  |
|  | Iraq       | ACC/AHA    | 18.2 | (15.9,20.4) | 11.9 | (9.7,14.0)  | 17.6 | (15.3,19.9) |
|  |            | 140/90     | 16.1 | (13.8,18.5) | 11.0 | (8.9,13.2)  | 16.4 | (14.2,18.7) |
|  |            | NICE       | 5.8  | (4.5, 7.0)  | 5.9  | (4.3, 7.4)  | 12.5 | (10.8,14.3) |
|  |            | WHO Hearts | 3.5  | (2.5, 4.4)  | 4.4  | (3.0, 5.8)  | 9.4  | (7.8,11.0)  |
|  | Lebanon    | ACC/AHA    | 21.2 | (16.6,25.9) | 2.8  | (1.3, 4.4)  | 7.9  | (5.9,10.0)  |
|  |            | 140/90     | 16.0 | (11.8,20.2) | 2.1  | (0.7, 3.5)  | 5.3  | (3.8, 6.9)  |
|  |            | NICE       | 9.8  | (6.1,13.6)  | 1.1  | (-0.1, 2.3) | 4.0  | (2.6, 5.4)  |
|  |            | WHO Hearts | 6.1  | (2.6, 9.6)  | 0.4  | (0.0, 0.9)  | 1.4  | (0.8, 2.1)  |
|  | Morocco    | ACC/AHA    | 22.0 | (20.4,23.7) | 5.5  | (4.6, 6.3)  | 7.2  | (6.3, 8.2)  |
|  |            | 140/90     | 19.2 | (17.6,20.8) | 5.2  | (4.4, 6.0)  | 6.3  | (5.4, 7.2)  |
|  |            | NICE       | 9.8  | (8.7,10.9)  | 3.3  | (2.7, 3.9)  | 5.4  | (4.6, 6.3)  |
|  |            | WHO Hearts | 5.5  | (4.5, 6.4)  | 2.3  | (1.8, 2.9)  | 3.8  | (3.1, 4.5)  |
|  | Sudan      | ACC/AHA    | 34.5 | (32.6,36.5) | 4.0  | (3.2, 4.9)  | 7.9  | (6.7, 9.1)  |
|  |            | 140/90     | 32.7 | (30.8,34.6) | 3.8  | (3.0, 4.6)  | 7.3  | (6.2, 8.5)  |
|  |            | NICE       | 15.0 | (13.6,16.5) | 2.5  | (1.8, 3.2)  | 6.2  | (5.2, 7.3)  |
|  |            | WHO Hearts | 11.4 | (10.1,12.7) | 2.2  | (1.5, 2.9)  | 4.5  | (3.6, 5.4)  |
|  | Azerbaijan | ACC/AHA    | 16.6 | (14.3,18.8) | 7.0  | (5.5, 8.6)  | 12.9 | (11.0,14.9) |
|  |            | 140/90     | 16.3 | (14.1,18.5) | 6.8  | (5.2, 8.3)  | 12.3 | (10.3,14.2) |
|  |            | NICE       | 5.7  | (4.4, 7.1)  | 3.9  | (2.8, 5.0)  | 8.2  | (6.7, 9.7)  |
|  |            | WHO Hearts | 4.8  | (3.5, 6.2)  | 3.6  | (2.5, 4.7)  | 7.1  | (5.6, 8.6)  |
|  | Belarus    | ACC/AHA    | 14.8 | (13.3,16.4) | 10.8 | (9.4,12.2)  | 26.7 | (25.0,28.5) |
|  |            | 140/90     | 13.3 | (11.8,14.8) | 10.3 | (9.0,11.6)  | 25.1 | (23.4,26.8) |
|  |            | NICE       | 4.9  | (4.0, 5.9)  | 6.3  | (5.3, 7.4)  | 19.7 | (18.3,21.1) |
|  |            | WHO Hearts | 3.4  | (2.5, 4.2)  | 4.8  | (3.9, 5.7)  | 14.4 | (13.1,15.8) |
|  | Georgia    | ACC/AHA    | 15.9 | (14.3,17.5) | 7.2  | (6.0, 8.3)  | 16.2 | (14.6,17.7) |
|  |            | 140/90     | 14.7 | (13.2,16.3) | 6.7  | (5.6, 7.8)  | 14.4 | (13.0,15.8) |

|                 |            |            |      |             |      |             |      |             |
|-----------------|------------|------------|------|-------------|------|-------------|------|-------------|
|                 |            | NICE       | 6.2  | (5.1, 7.3)  | 4.2  | (3.3, 5.1)  | 10.5 | (9.2,11.7)  |
|                 |            | WHO Hearts | 4.7  | (3.7, 5.7)  | 3.1  | (2.3, 3.8)  | 8.4  | (7.3, 9.6)  |
|                 | Kazakhstan | ACC/AHA    | 9.5  | (8.6,10.5)  | 0.8  | (0.5, 1.0)  | 11.7 | (10.9,12.5) |
|                 |            | 140/90     | 8.9  | (8.0, 9.7)  | 0.7  | (0.5, 1.0)  | 11.0 | (10.2,11.8) |
|                 |            | NICE       | 2.6  | (2.1, 3.0)  | 0.4  | (0.2, 0.5)  | 6.0  | (5.3, 6.6)  |
|                 |            | WHO Hearts | 1.8  | (1.4, 2.3)  | 0.2  | (0.1, 0.4)  | 3.9  | (3.4, 4.5)  |
|                 | Kyrgyzstan | ACC/AHA    | 26.2 | (23.4,29.1) | 11.0 | (8.7,13.3)  | 13.2 | (11.2,15.2) |
|                 |            | 140/90     | 26.1 | (23.2,28.9) | 10.6 | (8.4,12.9)  | 13.2 | (11.2,15.2) |
|                 |            | NICE       | 8.9  | (7.2,10.6)  | 6.2  | (4.6, 7.7)  | 10.7 | (9.0,12.4)  |
|                 |            | WHO Hearts | 8.5  | (6.8,10.2)  | 4.7  | (3.4, 6.0)  | 8.9  | (7.4,10.4)  |
|                 | Moldova    | ACC/AHA    | 24.3 | (22.4,26.3) | 11.0 | (9.5,12.5)  | 17.3 | (15.7,18.8) |
|                 |            | 140/90     | 22.6 | (20.6,24.5) | 10.8 | (9.3,12.2)  | 16.7 | (15.1,18.3) |
|                 |            | NICE       | 11.2 | (9.7,12.6)  | 7.5  | (6.4, 8.7)  | 13.8 | (12.4,15.3) |
|                 |            | WHO Hearts | 9.0  | (7.6,10.4)  | 6.3  | (5.2, 7.4)  | 11.1 | (9.8,12.5)  |
|                 | Tajikistan | ACC/AHA    | 28.4 | (24.9,32.0) | 9.2  | (7.0,11.4)  | 12.6 | (10.4,14.9) |
|                 |            | 140/90     | 28.4 | (24.8,31.9) | 9.2  | (7.0,11.4)  | 12.6 | (10.4,14.8) |
|                 |            | NICE       | 11.7 | (9.4,14.0)  | 5.3  | (3.7, 6.8)  | 9.3  | (7.4,11.2)  |
|                 |            | WHO Hearts | 10.6 | (8.3,12.9)  | 5.2  | (3.6, 6.8)  | 8.6  | (6.7,10.5)  |
| South-East Asia | Bhutan     | ACC/AHA    | 26.4 | (23.4,29.3) | 12.4 | (10.0,14.7) | 7.3  | (5.6, 9.0)  |
|                 |            | 140/90     | 26.3 | (23.3,29.2) | 12.4 | (10.0,14.7) | 7.2  | (5.6, 8.9)  |
|                 |            | NICE       | 9.6  | (7.9,11.4)  | 5.1  | (3.7, 6.4)  | 4.9  | (3.5, 6.3)  |
|                 |            | WHO Hearts | 8.9  | (7.1,10.6)  | 5.0  | (3.7, 6.3)  | 4.8  | (3.4, 6.2)  |
|                 | India      | ACC/AHA    | 26.5 | (26.3,26.7) | 0.4  | (0.4, 0.4)  | 1.1  | (1.0, 1.1)  |
|                 |            | 140/90     | 26.2 | (26.0,26.4) | 0.4  | (0.4, 0.4)  | 1.1  | (1.0, 1.1)  |
|                 |            | NICE       | 9.5  | (9.3, 9.6)  | 0.2  | (0.2, 0.2)  | 0.5  | (0.5, 0.6)  |
|                 |            | WHO Hearts | 8.6  | (8.5, 8.7)  | 0.2  | (0.2, 0.2)  | 0.5  | (0.5, 0.5)  |
|                 | Indonesia  | ACC/AHA    | 19.2 | (18.4,20.1) | 9.6  | (9.0,10.3)  | 4.0  | (3.6, 4.5)  |
|                 |            | 140/90     | 19.0 | (18.2,19.9) | 9.6  | (8.9,10.2)  | 4.0  | (3.5, 4.4)  |
|                 |            | NICE       | 7.4  | (6.8, 8.0)  | 5.6  | (5.1, 6.1)  | 2.7  | (2.3, 3.1)  |

|                    |             |            |             |             |            |            |            |            |
|--------------------|-------------|------------|-------------|-------------|------------|------------|------------|------------|
| Western<br>Pacific | Myanmar     | WHO Hearts | 6.8         | (6.2, 7.3)  | 5.4        | (4.9, 5.9) | 2.6        | (2.2, 3.0) |
|                    |             | ACC/AHA    | 16.7        | (14.8,18.7) | 9.2        | (8.0,10.5) | 8.3        | (6.8, 9.8) |
|                    |             | 140/90     | 16.4        | (14.4,18.3) | 9.2        | (7.9,10.4) | 8.2        | (6.7, 9.8) |
|                    | Nepal       | NICE       | 6.0         | (4.6, 7.5)  | 4.5        | (3.5, 5.4) | 4.3        | (3.3, 5.4) |
|                    |             | WHO Hearts | 5.7         | (4.2, 7.1)  | 4.3        | (3.4, 5.3) | 4.1        | (3.1, 5.2) |
|                    |             | ACC/AHA    | 22.8        | (20.8,24.8) | 3.2        | (2.3, 4.1) | 4.2        | (3.3, 5.2) |
|                    | Sri Lanka   | 140/90     | 22.4        | (20.4,24.4) | 3.1        | (2.2, 4.0) | 4.2        | (3.2, 5.1) |
|                    |             | NICE       | 8.7         | (7.5,10.0)  | 1.9        | (1.2, 2.6) | 2.2        | (1.5, 2.9) |
|                    |             | WHO Hearts | 7.5         | (6.3, 8.8)  | 1.8        | (1.2, 2.5) | 1.8        | (1.2, 2.4) |
|                    | Timor-Leste | ACC/AHA    | 19.3        | (17.6,21.1) | 5.0        | (3.9, 6.0) | 9.1        | (8.0,10.3) |
|                    |             | 140/90     | 19.2        | (17.4,20.9) | 5.0        | (3.9, 6.0) | 9.1        | (8.0,10.2) |
|                    |             | NICE       | 6.9         | (5.8, 8.0)  | 2.1        | (1.5, 2.8) | 5.3        | (4.4, 6.2) |
|                    | Cambodia    | WHO Hearts | 6.3         | (5.2, 7.3)  | 1.8        | (1.2, 2.5) | 4.8        | (3.8, 5.7) |
|                    |             | ACC/AHA    | 24.6        | (22.0,27.2) | 3.2        | (2.2, 4.3) | 4.3        | (3.0, 5.5) |
|                    |             | 140/90     | 24.4        | (21.8,27.0) | 3.2        | (2.2, 4.3) | 4.3        | (3.0, 5.5) |
|                    | China       | NICE       | 8.6         | (6.9,10.2)  | 1.8        | (1.0, 2.6) | 2.8        | (1.7, 3.8) |
|                    |             | WHO Hearts | 7.6         | (6.0, 9.2)  | 1.7        | (0.9, 2.5) | 2.8        | (1.7, 3.8) |
|                    |             | ACC/AHA    | 7.2         | (6.1, 8.3)  | 2.5        | (1.9, 3.1) | 2.3        | (1.6, 3.0) |
|                    | Mongolia    | 140/90     | 7.2         | (6.1, 8.3)  | 2.5        | (1.9, 3.1) | 2.3        | (1.6, 3.0) |
|                    |             | NICE       | 1.4         | (0.9, 1.8)  | 1.1        | (0.7, 1.5) | 1.0        | (0.5, 1.5) |
|                    |             | WHO Hearts | 1.2         | (0.8, 1.6)  | 1.0        | (0.6, 1.5) | 1.0        | (0.5, 1.5) |
|                    | China       | ACC/AHA    | 18.1        | (17.1,19.1) | 1.3        | (1.0, 1.6) | 6.9        | (6.3, 7.5) |
|                    |             | 140/90     | 15.8        | (14.7,16.8) | 1.2        | (0.9, 1.5) | 6.4        | (5.8, 7.0) |
|                    |             | NICE       | 6.5         | (5.8, 7.1)  | 0.8        | (0.6, 1.0) | 4.8        | (4.3, 5.3) |
| Mongolia           | WHO Hearts  | 3.8        | (3.3, 4.4)  | 0.6         | (0.4, 0.8) | 3.3        | (2.8, 3.7) |            |
|                    | ACC/AHA     | 25.6       | (23.0,28.2) | 11.8        | (9.9,13.7) | 7.9        | (6.2, 9.5) |            |
|                    | 140/90      | 24.0       | (21.5,26.6) | 11.6        | (9.8,13.5) | 7.7        | (6.0, 9.3) |            |
|                    |             | NICE       | 9.2         | (7.5,11.0)  | 7.8        | (6.1, 9.5) | 5.5        | (4.0, 6.9) |

|          |              |            |             |             |            |            |            |             |
|----------|--------------|------------|-------------|-------------|------------|------------|------------|-------------|
| Africa   | Vanuatu      | WHO Hearts | 7.2         | (5.5, 8.8)  | 7.1        | (5.5, 8.8) | 5.0        | (3.6, 6.3)  |
|          |              | ACC/AHA    | 27.3        | (25.2,29.5) | 5.0        | (3.8, 6.2) | 1.0        | (0.3, 1.7)  |
|          |              | 140/90     | 27.3        | (25.2,29.5) | 5.0        | (3.8, 6.2) | 1.0        | (0.3, 1.7)  |
|          |              | NICE       | 9.9         | (7.9,11.9)  | 2.6        | (1.6, 3.7) | 1.1        | (-1.4, 3.6) |
|          | Algeria      | WHO Hearts | 8.5         | (6.9,10.2)  | 2.2        | (1.3, 3.1) | 0.9        | (-1.4, 3.3) |
|          |              | ACC/AHA    | 25.9        | (24.2,27.7) | 4.1        | (3.4, 4.9) | 5.0        | (4.2, 5.7)  |
|          |              | 140/90     | 20.6        | (18.9,22.2) | 3.7        | (3.0, 4.4) | 4.0        | (3.3, 4.8)  |
|          |              | NICE       | 10.6        | (9.5,11.7)  | 2.9        | (2.3, 3.5) | 3.5        | (2.8, 4.2)  |
|          | Benin        | WHO Hearts | 5.7         | (4.9, 6.5)  | 2.0        | (1.5, 2.5) | 2.6        | (2.0, 3.2)  |
|          |              | ACC/AHA    | 32.9        | (28.3,37.5) | 1.7        | (1.0, 2.3) | 2.6        | (1.6, 3.7)  |
|          |              | 140/90     | 32.9        | (28.2,37.5) | 1.7        | (1.0, 2.3) | 2.6        | (1.6, 3.7)  |
|          |              | NICE       | 12.9        | (8.0,17.7)  | 0.8        | (0.4, 1.3) | 1.9        | (1.0, 2.8)  |
|          | Botswana     | WHO Hearts | 11.6        | (7.0,16.2)  | 0.7        | (0.3, 1.2) | 1.6        | (0.8, 2.5)  |
|          |              | ACC/AHA    | 21.3        | (17.4,25.3) | 9.0        | (6.2,11.7) | 6.8        | (4.6, 9.1)  |
|          |              | 140/90     | 20.5        | (16.6,24.4) | 9.0        | (6.2,11.7) | 6.7        | (4.5, 8.9)  |
|          |              | NICE       | 9.5         | (6.5,12.4)  | 4.2        | (2.3, 6.1) | 4.4        | (2.6, 6.1)  |
|          | Burkina Faso | WHO Hearts | 8.4         | (5.6,11.2)  | 3.9        | (2.1, 5.8) | 3.5        | (1.9, 5.2)  |
|          |              | ACC/AHA    | 18.3        | (15.8,20.7) | 2.9        | (1.7, 4.2) | 0.9        | (0.2, 1.5)  |
|          |              | 140/90     | 18.2        | (15.7,20.6) | 2.9        | (1.7, 4.2) | 0.9        | (0.2, 1.5)  |
|          |              | NICE       | 4.4         | (3.1, 5.7)  | 1.9        | (0.6, 3.2) | 0.9        | (-0.4, 2.3) |
|          | Comoros      | WHO Hearts | 4.2         | (2.9, 5.5)  | 1.9        | (0.6, 3.3) | 0.6        | (-0.4, 1.6) |
|          |              | ACC/AHA    | 21.2        | (18.8,23.6) | 2.7        | (1.9, 3.5) | 1.8        | (1.1, 2.5)  |
|          |              | 140/90     | 20.8        | (18.5,23.2) | 2.7        | (1.9, 3.5) | 1.8        | (1.1, 2.5)  |
|          |              | NICE       | 7.5         | (6.1, 9.0)  | 1.4        | (0.8, 2.0) | 1.1        | (0.6, 1.7)  |
| Eswatini | WHO Hearts   | 5.9        | (4.7, 7.2)  | 1.4         | (0.9, 2.0) | 1.0        | (0.5, 1.5) |             |
|          | ACC/AHA      | 22.5       | (17.7,27.3) | 3.6         | (2.0, 5.1) | 4.1        | (2.4, 5.8) |             |
|          | 140/90       | 22.1       | (17.3,26.8) | 3.6         | (2.0, 5.1) | 3.9        | (2.2, 5.7) |             |
|          | NICE         | 8.0        | (5.6,10.4)  | 1.7         | (0.6, 2.7) | 2.3        | (1.0, 3.6) |             |
|          |              | WHO Hearts | 6.8         | (4.4, 9.2)  | 1.7        | (0.6, 2.7) | 1.7        | (0.6, 2.9)  |



|              |            |      |             |     |             |      |             |
|--------------|------------|------|-------------|-----|-------------|------|-------------|
| Ghana        | ACC/AHA    | 38.4 | (33.7,43.2) | 1.3 | (0.4, 2.2)  | 2.8  | (1.2, 4.5)  |
|              | 140/90     | 38.1 | (33.4,42.8) | 1.3 | (0.4, 2.2)  | 2.7  | (1.0, 4.4)  |
|              | NICE       | 16.8 | (13.7,20.0) | 1.1 | (0.2, 2.0)  | 2.1  | (0.5, 3.7)  |
|              | WHO Hearts | 16.1 | (13.0,19.3) | 1.1 | (0.2, 2.0)  | 2.0  | (0.4, 3.5)  |
| Kenya        | ACC/AHA    | 25.6 | (22.4,28.9) | 4.2 | (2.3, 6.1)  | 1.1  | (0.4, 1.8)  |
|              | 140/90     | 25.3 | (22.0,28.5) | 4.2 | (2.3, 6.1)  | 1.1  | (0.4, 1.8)  |
|              | NICE       | 7.6  | (5.8, 9.4)  | 2.3 | (1.0, 3.7)  | 0.6  | (0.1, 1.1)  |
|              | WHO Hearts | 6.4  | (4.7, 8.2)  | 2.1 | (0.8, 3.4)  | 0.6  | (0.1, 1.1)  |
| Lesotho      | ACC/AHA    | 25.9 | (21.8,30.0) | 6.6 | (3.9, 9.2)  | 1.9  | (0.4, 3.4)  |
|              | 140/90     | 25.7 | (21.6,29.7) | 6.4 | (3.8, 9.0)  | 1.9  | (0.4, 3.4)  |
|              | NICE       | 10.2 | (7.4,13.0)  | 3.7 | (1.5, 5.8)  | 0.8  | (0.0, 1.5)  |
|              | WHO Hearts | 8.0  | (5.4,10.5)  | 3.0 | (1.0, 5.0)  | 0.7  | (0.0, 1.4)  |
| Liberia      | ACC/AHA    | 28.6 | (24.9,32.2) | 3.0 | (1.2, 4.8)  | 4.0  | (2.1, 5.9)  |
|              | 140/90     | 27.8 | (24.0,31.6) | 3.0 | (1.2, 4.8)  | 4.0  | (2.1, 5.9)  |
|              | NICE       | 12.2 | (9.2,15.1)  | 2.3 | (0.6, 4.1)  | 2.8  | (1.3, 4.3)  |
|              | WHO Hearts | 11.2 | (8.2,14.2)  | 2.0 | (-0.2, 4.2) | 2.8  | (1.3, 4.3)  |
| Mozambique   | ACC/AHA    | 33.1 | (29.0,37.1) | 2.7 | (1.1, 4.4)  | 1.0  | (0.3, 1.8)  |
|              | 140/90     | 32.0 | (27.9,36.1) | 2.7 | (1.1, 4.4)  | 1.1  | (0.3, 1.8)  |
|              | NICE       | 13.1 | (10.6,15.6) | 2.2 | (0.5, 3.8)  | 0.4  | (0.1, 0.6)  |
|              | WHO Hearts | 10.6 | (8.5,12.7)  | 2.2 | (0.5, 3.9)  | 0.3  | (0.1, 0.6)  |
| Namibia      | ACC/AHA    | 24.5 | (20.8,28.3) | 1.9 | (1.0, 2.7)  | 7.4  | (5.8, 9.0)  |
|              | 140/90     | 23.8 | (20.2,27.5) | 1.9 | (1.0, 2.7)  | 7.3  | (5.7, 8.9)  |
|              | NICE       | 9.6  | (6.7,12.5)  | 0.8 | (0.0, 1.6)  | 4.7  | (3.4, 6.1)  |
|              | WHO Hearts | 8.4  | (5.8,11.0)  | 0.8 | (0.0, 1.5)  | 4.2  | (2.9, 5.5)  |
| Seychelles   | ACC/AHA    | 21.6 | (18.0,25.2) | 6.1 | (4.0, 8.3)  | 15.0 | (12.3,17.8) |
|              | 140/90     | 20.6 | (17.0,24.1) | 6.2 | (4.0, 8.3)  | 14.3 | (11.6,17.0) |
|              | NICE       | 8.0  | (5.9,10.2)  | 3.1 | (1.6, 4.6)  | 7.9  | (5.8,10.0)  |
|              | WHO Hearts | 6.8  | (4.7, 8.8)  | 2.9 | (1.5, 4.3)  | 5.4  | (3.6, 7.3)  |
| South Africa | ACC/AHA    | 25.2 | (22.9,27.6) | 1.8 | (0.9, 2.7)  | 5.8  | (4.8, 6.8)  |

|          |          |            |      |             |      |            |     |             |
|----------|----------|------------|------|-------------|------|------------|-----|-------------|
|          |          | 140/90     | 24.4 | (22.0,26.7) | 1.8  | (0.9, 2.7) | 5.4 | (4.4, 6.4)  |
|          |          | NICE       | 8.1  | (6.7, 9.5)  | 1.1  | (0.3, 1.9) | 3.1 | (2.5, 3.8)  |
|          |          | WHO Hearts | 6.9  | (5.5, 8.3)  | 0.9  | (0.2, 1.6) | 2.1 | (1.5, 2.7)  |
|          | Tanzania | ACC/AHA    | 26.0 | (22.5,29.5) | 2.2  | (1.4, 2.9) | 1.0 | (0.4, 1.5)  |
|          |          | 140/90     | 25.5 | (22.0,28.9) | 2.1  | (1.3, 2.8) | 0.9 | (0.4, 1.5)  |
|          |          | NICE       | 10.5 | (7.8,13.2)  | 0.9  | (0.4, 1.5) | 0.7 | (0.3, 1.1)  |
|          |          | WHO Hearts | 8.6  | (5.8,11.5)  | 0.8  | (0.3, 1.2) | 0.7 | (0.3, 1.1)  |
|          | Togo     | ACC/AHA    | 26.6 | (23.2,29.9) | 2.9  | (1.6, 4.1) | 1.2 | (0.0, 2.4)  |
|          |          | 140/90     | 26.5 | (23.2,29.8) | 2.9  | (1.6, 4.1) | 1.2 | (0.0, 2.4)  |
|          |          | NICE       | 6.9  | (4.9, 9.0)  | 1.3  | (0.4, 2.2) | 1.2 | (-0.3, 2.6) |
|          |          | WHO Hearts | 6.4  | (4.4, 8.4)  | 1.0  | (0.3, 1.7) | 0.7 | (-0.4, 1.9) |
|          | Uganda   | ACC/AHA    | 27.1 | (23.7,30.6) | 2.3  | (1.2, 3.3) | 0.7 | (0.2, 1.1)  |
|          |          | 140/90     | 26.8 | (23.4,30.2) | 2.3  | (1.2, 3.3) | 0.7 | (0.2, 1.1)  |
|          |          | NICE       | 7.7  | (5.5, 9.9)  | 1.9  | (0.9, 2.9) | 0.5 | (0.0, 0.9)  |
|          |          | WHO Hearts | 6.6  | (4.4, 8.7)  | 1.8  | (0.8, 2.8) | 0.2 | (-0.1, 0.5) |
|          | Zambia   | ACC/AHA    | 20.1 | (17.3,22.8) | 3.7  | (2.0, 5.4) | 1.6 | (0.6, 2.6)  |
|          |          | 140/90     | 19.8 | (17.0,22.5) | 3.6  | (1.9, 5.3) | 1.6 | (0.6, 2.6)  |
|          |          | NICE       | 5.2  | (3.7, 6.7)  | 1.6  | (0.6, 2.6) | 0.6 | (-0.1, 1.4) |
|          |          | WHO Hearts | 4.5  | (3.0, 5.9)  | 1.5  | (0.5, 2.4) | 0.6 | (-0.1, 1.3) |
| Americas | Belize   | ACC/AHA    | 18.3 | (14.4,22.2) | 3.0  | (1.5, 4.5) | 2.3 | (1.1, 3.5)  |
|          |          | 140/90     | 17.8 | (13.9,21.7) | 2.9  | (1.4, 4.3) | 2.3 | (1.1, 3.5)  |
|          |          | NICE       | 4.4  | (2.8, 6.1)  | 1.3  | (0.4, 2.3) | 1.1 | (0.3, 1.8)  |
|          |          | WHO Hearts | 2.9  | (1.5, 4.4)  | 0.6  | (0.0, 1.1) | 0.8 | (0.2, 1.5)  |
|          | Brazil   | ACC/AHA    | 19.1 | (18.1,20.2) | 3.0  | (2.5, 3.5) | 7.8 | (7.2, 8.5)  |
|          |          | 140/90     | 18.7 | (17.7,19.7) | 2.9  | (2.4, 3.5) | 7.6 | (7.0, 8.3)  |
|          |          | NICE       | 5.5  | (4.9, 6.1)  | 1.5  | (1.1, 1.9) | 3.9 | (3.4, 4.4)  |
|          |          | WHO Hearts | 4.5  | (3.9, 5.0)  | 1.4  | (1.0, 1.8) | 3.2 | (2.7, 3.7)  |
|          | Chile    | ACC/AHA    | 18.8 | (15.2,22.4) | 10.2 | (7.8,12.7) | 4.8 | (3.1, 6.4)  |
|          |          | 140/90     | 16.5 | (12.8,20.2) | 9.9  | (7.5,12.4) | 4.3 | (2.6, 6.0)  |

|                       |                              |            |      |             |     |            |     |            |
|-----------------------|------------------------------|------------|------|-------------|-----|------------|-----|------------|
|                       |                              | NICE       | 8.4  | (6.1,10.7)  | 5.8 | (3.9, 7.7) | 2.4 | (1.4, 3.5) |
|                       |                              | WHO Hearts | 3.0  | (1.6, 4.4)  | 3.2 | (2.0, 4.4) | 1.9 | (1.0, 2.9) |
|                       | Costa Rica                   | ACC/AHA    | 5.8  | (4.1, 7.6)  | 4.2 | (2.2, 6.1) | 5.9 | (4.1, 7.7) |
|                       |                              | 140/90     | 5.7  | (4.0, 7.5)  | 4.2 | (2.2, 6.1) | 5.5 | (3.7, 7.4) |
|                       |                              | NICE       | 1.2  | (0.4, 2.0)  | 3.0 | (1.1, 4.8) | 1.6 | (0.7, 2.5) |
|                       |                              | WHO Hearts | 1.1  | (0.4, 1.8)  | 2.4 | (1.0, 3.8) | 1.3 | (0.3, 2.2) |
|                       | Ecuador                      | ACC/AHA    | 12.7 | (10.3,15.1) | 3.0 | (2.1, 3.9) | 2.6 | (1.7, 3.6) |
|                       |                              | 140/90     | 12.5 | (10.2,14.9) | 3.0 | (2.1, 3.9) | 2.6 | (1.7, 3.6) |
|                       |                              | NICE       | 4.6  | (1.7, 7.5)  | 0.9 | (0.6, 1.2) | 1.0 | (0.2, 1.8) |
|                       |                              | WHO Hearts | 4.0  | (1.4, 6.6)  | 0.9 | (0.5, 1.2) | 0.9 | (0.2, 1.5) |
|                       | Grenada                      | ACC/AHA    | 27.4 | (22.8,32.0) | 9.5 | (6.5,12.6) | 9.0 | (5.7,12.3) |
|                       |                              | 140/90     | 27.1 | (22.5,31.7) | 9.5 | (6.5,12.6) | 8.5 | (5.3,11.7) |
|                       |                              | NICE       | 8.2  | (4.4,12.0)  | 5.6 | (2.9, 8.3) | 3.0 | (1.3, 4.7) |
|                       |                              | WHO Hearts | 6.4  | (3.3, 9.6)  | 4.1 | (2.0, 6.3) | 2.7 | (1.1, 4.3) |
|                       | Guyana                       | ACC/AHA    | 16.4 | (13.6,19.3) | 5.5 | (3.8, 7.2) | 7.2 | (4.6, 9.9) |
|                       |                              | 140/90     | 15.6 | (12.7,18.4) | 4.8 | (3.1, 6.6) | 7.0 | (4.3, 9.7) |
|                       |                              | NICE       | 6.9  | (5.1, 8.7)  | 2.6 | (1.4, 3.8) | 4.6 | (2.4, 6.7) |
|                       |                              | WHO Hearts | 4.5  | (3.1, 5.9)  | 2.0 | (0.9, 3.0) | 3.4 | (1.3, 5.4) |
|                       | Mexico                       | ACC/AHA    | 23.2 | (19.6,26.9) | 1.3 | (0.5, 2.1) | 4.4 | (3.0, 5.9) |
|                       |                              | 140/90     | 22.5 | (18.9,26.1) | 1.3 | (0.4, 2.1) | 4.4 | (2.9, 5.8) |
|                       |                              | NICE       | 6.8  | (4.6, 9.0)  | 0.7 | (0.1, 1.4) | 2.6 | (1.6, 3.6) |
|                       |                              | WHO Hearts | 5.1  | (3.0, 7.2)  | 0.6 | (0.0, 1.2) | 2.0 | (0.9, 3.0) |
|                       | St. Vincent & the Grenadines | ACC/AHA    | 20.6 | (17.5,23.6) | 5.3 | (3.8, 6.9) | 5.0 | (3.6, 6.4) |
|                       |                              | 140/90     | 19.4 | (16.4,22.5) | 5.3 | (3.8, 6.9) | 4.9 | (3.5, 6.3) |
|                       |                              | NICE       | 7.3  | (5.7, 8.9)  | 2.8 | (1.6, 4.1) | 3.2 | (1.9, 4.4) |
|                       |                              | WHO Hearts | 4.9  | (3.6, 6.2)  | 2.4 | (1.2, 3.5) | 2.3 | (1.3, 3.3) |
| Eastern Mediterranean | Iran                         | ACC/AHA    | 19.0 | (18.2,19.8) | 4.2 | (3.9, 4.6) | 4.2 | (3.8, 4.5) |
|                       |                              | 140/90     | 13.6 | (12.9,14.4) | 3.6 | (3.2, 3.9) | 3.4 | (3.1, 3.7) |
|                       |                              | NICE       | 7.3  | (6.8, 7.9)  | 2.6 | (2.3, 2.9) | 3.0 | (2.7, 3.3) |

|        |            |            |      |             |      |             |      |             |
|--------|------------|------------|------|-------------|------|-------------|------|-------------|
|        |            | WHO Hearts | 4.1  | (3.7, 4.4)  | 1.6  | (1.4, 1.8)  | 2.1  | (1.8, 2.3)  |
|        | Iraq       | ACC/AHA    | 26.4 | (22.5,30.3) | 11.0 | (8.3,13.8)  | 12.6 | (10.2,14.9) |
|        |            | 140/90     | 22.1 | (18.3,26.0) | 10.0 | (7.3,12.6)  | 10.8 | (8.5,13.0)  |
|        |            | NICE       | 11.4 | (8.7,14.2)  | 7.9  | (5.4,10.4)  | 8.2  | (6.4,10.0)  |
|        | Lebanon    | WHO Hearts | 7.2  | (4.7, 9.7)  | 5.6  | (3.5, 7.7)  | 6.0  | (4.6, 7.4)  |
|        |            | ACC/AHA    | 29.3 | (24.0,34.6) | 2.5  | (0.8, 4.3)  | 9.4  | (7.1,11.8)  |
|        |            | 140/90     | 22.4 | (16.8,27.9) | 1.8  | (0.4, 3.2)  | 7.6  | (5.4, 9.8)  |
|        |            | NICE       | 16.5 | (11.2,21.8) | 1.5  | (0.1, 2.8)  | 6.9  | (4.8, 9.0)  |
|        | Morocco    | WHO Hearts | 11.7 | (6.7,16.7)  | 1.4  | (0.1, 2.7)  | 4.8  | (2.8, 6.8)  |
|        |            | ACC/AHA    | 30.4 | (27.9,32.9) | 4.3  | (3.3, 5.3)  | 3.1  | (2.3, 3.8)  |
|        |            | 140/90     | 22.7 | (20.2,25.2) | 3.9  | (2.9, 4.9)  | 2.6  | (1.8, 3.3)  |
|        |            | NICE       | 12.9 | (11.0,14.8) | 3.0  | (2.1, 3.9)  | 2.3  | (1.6, 3.1)  |
|        | Sudan      | WHO Hearts | 7.8  | (6.5, 9.1)  | 2.0  | (1.3, 2.8)  | 1.6  | (1.0, 2.2)  |
|        |            | ACC/AHA    | 37.8 | (35.2,40.3) | 2.5  | (1.7, 3.3)  | 2.9  | (2.1, 3.6)  |
|        |            | 140/90     | 34.2 | (31.7,36.6) | 2.5  | (1.7, 3.3)  | 2.7  | (2.0, 3.3)  |
|        |            | NICE       | 15.4 | (14.0,16.9) | 1.9  | (1.2, 2.6)  | 2.3  | (1.7, 2.9)  |
|        | Azerbaijan | WHO Hearts | 10.6 | (9.2,12.0)  | 1.7  | (1.0, 2.4)  | 2.0  | (1.5, 2.6)  |
| Europe |            | ACC/AHA    | 23.0 | (20.1,25.9) | 7.0  | (5.3, 8.8)  | 8.3  | (6.8, 9.9)  |
|        |            | 140/90     | 19.3 | (16.3,22.3) | 6.2  | (4.5, 8.0)  | 7.6  | (6.1, 9.1)  |
|        |            | NICE       | 10.4 | (8.2,12.5)  | 3.9  | (2.6, 5.3)  | 6.3  | (5.1, 7.6)  |
|        | Belarus    | WHO Hearts | 6.6  | (4.8, 8.5)  | 3.3  | (2.1, 4.5)  | 5.6  | (4.4, 6.8)  |
|        |            | ACC/AHA    | 30.9 | (28.5,33.2) | 15.5 | (13.5,17.5) | 17.8 | (16.0,19.6) |
|        |            | 140/90     | 23.2 | (21.0,25.4) | 14.0 | (12.0,16.0) | 16.6 | (14.8,18.5) |
|        |            | NICE       | 15.2 | (13.3,17.1) | 10.9 | (9.2,12.6)  | 15.5 | (13.7,17.3) |
|        | Georgia    | WHO Hearts | 8.4  | (7.1, 9.8)  | 7.8  | (6.4, 9.3)  | 12.7 | (11.1,14.3) |
|        |            | ACC/AHA    | 22.5 | (19.3,25.8) | 10.9 | (8.5,13.4)  | 12.8 | (10.4,15.2) |
|        |            | 140/90     | 18.7 | (15.6,21.7) | 9.7  | (7.3,12.0)  | 11.0 | (8.7,13.3)  |
|        |            | NICE       | 10.1 | (8.0,12.2)  | 7.1  | (5.3, 9.0)  | 9.7  | (7.5,11.9)  |
|        |            | WHO Hearts | 8.0  | (6.0, 9.9)  | 6.7  | (4.9, 8.4)  | 8.5  | (6.5,10.6)  |

|                 |            |            |             |             |            |             |            |            |
|-----------------|------------|------------|-------------|-------------|------------|-------------|------------|------------|
| South-East Asia | Kazakhstan | ACC/AHA    | 16.6        | (15.4,17.9) | 0.8        | (0.5, 1.1)  | 8.1        | (7.3, 8.9) |
|                 |            | 140/90     | 11.2        | (10.1,12.4) | 0.7        | (0.4, 1.1)  | 6.9        | (6.1, 7.7) |
|                 |            | NICE       | 4.2         | (3.5, 4.8)  | 0.4        | (0.2, 0.6)  | 5.3        | (4.6, 6.0) |
|                 |            | WHO Hearts | 2.2         | (1.7, 2.7)  | 0.2        | (0.1, 0.4)  | 3.5        | (2.9, 4.1) |
|                 | Kyrgyzstan | ACC/AHA    | 35.9        | (31.9,39.9) | 11.3       | (8.6,14.0)  | 6.1        | (4.3, 8.0) |
|                 |            | 140/90     | 32.6        | (28.8,36.4) | 11.1       | (8.4,13.8)  | 6.1        | (4.3, 8.0) |
|                 |            | NICE       | 16.3        | (13.3,19.3) | 9.1        | (6.5,11.6)  | 5.5        | (3.7, 7.3) |
|                 |            | WHO Hearts | 11.0        | (8.5,13.4)  | 7.4        | (5.0, 9.8)  | 5.3        | (3.4, 7.1) |
|                 | Moldova    | ACC/AHA    | 36.9        | (33.9,39.8) | 12.3       | (10.4,14.2) | 10.4       | (8.8,12.0) |
|                 |            | 140/90     | 28.6        | (25.7,31.5) | 11.4       | (9.5,13.3)  | 9.5        | (7.9,11.1) |
|                 |            | NICE       | 18.6        | (16.4,20.8) | 9.3        | (7.7,10.9)  | 8.9        | (7.5,10.3) |
|                 |            | WHO Hearts | 11.9        | (10.2,13.6) | 7.0        | (5.6, 8.4)  | 6.8        | (5.5, 8.1) |
|                 | Tajikistan | ACC/AHA    | 39.7        | (35.5,43.9) | 8.2        | (5.2,11.3)  | 6.1        | (4.3, 7.9) |
|                 |            | 140/90     | 38.1        | (33.8,42.3) | 7.9        | (4.9,11.0)  | 6.0        | (4.2, 7.8) |
|                 |            | NICE       | 16.5        | (13.2,19.9) | 6.1        | (3.3, 8.9)  | 4.7        | (3.1, 6.3) |
|                 |            | WHO Hearts | 13.3        | (10.3,16.3) | 5.6        | (2.8, 8.4)  | 4.1        | (2.5, 5.6) |
|                 | Bhutan     | ACC/AHA    | 29.9        | (26.1,33.8) | 8.4        | (6.2,10.5)  | 3.3        | (1.9, 4.7) |
|                 |            | 140/90     | 29.2        | (25.4,33.0) | 8.4        | (6.2,10.5)  | 3.3        | (1.9, 4.7) |
|                 |            | NICE       | 9.6         | (7.1,12.2)  | 3.5        | (2.2, 4.8)  | 2.2        | (1.0, 3.3) |
|                 |            | WHO Hearts | 8.4         | (6.0,10.9)  | 3.4        | (2.1, 4.6)  | 2.0        | (0.8, 3.1) |
| India           | ACC/AHA    | 30.7       | (30.5,30.9) | 0.3         | (0.3, 0.3) | 0.7         | (0.7, 0.8) |            |
|                 | 140/90     | 29.3       | (29.1,29.5) | 0.3         | (0.2, 0.3) | 0.7         | (0.7, 0.7) |            |
|                 | NICE       | 11.5       | (11.4,11.7) | 0.1         | (0.1, 0.2) | 0.4         | (0.4, 0.4) |            |
|                 | WHO Hearts | 8.9        | (8.8, 9.0)  | 0.1         | (0.1, 0.1) | 0.3         | (0.3, 0.3) |            |
| Indonesia       | ACC/AHA    | 23.2       | (22.3,24.2) | 5.1         | (4.5, 5.6) | 1.9         | (1.6, 2.2) |            |
|                 | 140/90     | 21.6       | (20.6,22.6) | 4.9         | (4.4, 5.5) | 1.8         | (1.5, 2.2) |            |
|                 | NICE       | 9.8        | (9.1,10.4)  | 3.4         | (3.0, 3.9) | 1.5         | (1.2, 1.8) |            |
|                 | WHO Hearts | 6.4        | (5.8, 7.0)  | 3.1         | (2.7, 3.4) | 1.1         | (0.9, 1.4) |            |
| Myanmar         | ACC/AHA    | 19.4       | (16.8,22.1) | 6.5         | (5.1, 8.0) | 4.9         | (2.9, 7.0) |            |

|  |             |            |      |             |     |            |      |             |
|--|-------------|------------|------|-------------|-----|------------|------|-------------|
|  |             | 140/90     | 18.8 | (16.2,21.5) | 6.3 | (4.9, 7.7) | 4.9  | (2.9, 6.9)  |
|  |             | NICE       | 8.1  | (5.9,10.3)  | 4.4 | (3.1, 5.7) | 2.7  | (1.5, 3.9)  |
|  |             | WHO Hearts | 7.2  | (5.1, 9.4)  | 4.0 | (2.8, 5.2) | 2.4  | (1.2, 3.5)  |
|  | Nepal       | ACC/AHA    | 34.4 | (31.1,37.8) | 3.2 | (2.0, 4.3) | 4.9  | (3.4, 6.3)  |
|  |             | 140/90     | 32.0 | (28.8,35.3) | 3.0 | (1.9, 4.1) | 4.4  | (3.1, 5.8)  |
|  |             | NICE       | 12.8 | (10.7,15.0) | 1.5 | (0.9, 2.1) | 2.9  | (1.8, 3.9)  |
|  |             | WHO Hearts | 9.5  | (7.5,11.6)  | 1.1 | (0.6, 1.7) | 1.9  | (1.1, 2.7)  |
|  | Sri Lanka   | ACC/AHA    | 25.2 | (22.8,27.6) | 3.5 | (2.6, 4.4) | 5.0  | (4.0, 6.0)  |
|  |             | 140/90     | 23.3 | (21.0,25.7) | 3.4 | (2.5, 4.3) | 4.8  | (3.8, 5.8)  |
|  |             | NICE       | 9.2  | (7.7,10.7)  | 1.7 | (1.0, 2.4) | 3.6  | (2.8, 4.5)  |
|  |             | WHO Hearts | 6.7  | (5.3, 8.1)  | 1.5 | (0.8, 2.2) | 2.6  | (1.8, 3.3)  |
|  | Timor-Leste | ACC/AHA    | 24.3 | (21.5,27.1) | 3.2 | (2.1, 4.3) | 2.5  | (1.5, 3.5)  |
|  |             | 140/90     | 22.5 | (19.7,25.3) | 3.1 | (2.0, 4.1) | 2.5  | (1.5, 3.5)  |
|  |             | NICE       | 9.7  | (7.9,11.6)  | 2.2 | (1.3, 3.1) | 1.8  | (1.0, 2.7)  |
|  |             | WHO Hearts | 7.2  | (5.4, 9.0)  | 1.9 | (1.0, 2.8) | 1.7  | (0.9, 2.6)  |
|  | Cambodia    | ACC/AHA    | 13.8 | (11.9,15.7) | 2.2 | (1.4, 3.0) | 1.2  | (0.7, 1.8)  |
|  |             | 140/90     | 12.4 | (10.6,14.2) | 2.0 | (1.3, 2.8) | 1.1  | (0.6, 1.5)  |
|  |             | NICE       | 5.3  | (3.7, 6.8)  | 1.2 | (0.7, 1.8) | 0.7  | (0.0, 1.4)  |
|  |             | WHO Hearts | 3.1  | (2.0, 4.2)  | 1.1 | (0.5, 1.6) | 0.6  | (-0.5, 1.7) |
|  | China       | ACC/AHA    | 30.1 | (28.5,31.8) | 1.9 | (1.5, 2.4) | 7.3  | (6.6, 8.0)  |
|  |             | 140/90     | 24.9 | (23.2,26.5) | 1.8 | (1.4, 2.2) | 6.4  | (5.7, 7.0)  |
|  |             | NICE       | 12.9 | (11.9,14.0) | 1.3 | (1.0, 1.7) | 5.2  | (4.6, 5.8)  |
|  |             | WHO Hearts | 8.4  | (7.5, 9.3)  | 1.0 | (0.7, 1.2) | 3.2  | (2.7, 3.7)  |
|  | Mongolia    | ACC/AHA    | 11.7 | (10.0,13.5) | 8.7 | (7.3,10.0) | 11.6 | (9.9,13.2)  |
|  |             | 140/90     | 11.2 | (9.5,12.9)  | 8.3 | (7.0, 9.6) | 11.1 | (9.4,12.7)  |
|  |             | NICE       | 4.9  | (3.6, 6.2)  | 3.6 | (2.7, 4.5) | 7.2  | (5.7, 8.7)  |
|  |             | WHO Hearts | 4.1  | (2.9, 5.3)  | 2.6 | (1.8, 3.3) | 6.0  | (4.7, 7.4)  |
|  | Vanuatu     | ACC/AHA    | 32.1 | (29.3,34.9) | 3.9 | (2.8, 5.0) | 0.9  | (-1.4, 3.1) |

Western  
Pacific

|            |      |             |     |            |     |             |
|------------|------|-------------|-----|------------|-----|-------------|
| 140/90     | 30.2 | (27.6,32.8) | 3.8 | (2.7, 4.9) | 0.9 | (-1.3, 3.1) |
| NICE       | 13.5 | (9.9,17.1)  | 2.5 | (1.6, 3.4) | 2.5 | (-2.6, 7.6) |
| WHO Hearts | 9.1  | (7.2,11.0)  | 2.1 | (1.2, 3.1) | 1.6 | (-3.3, 6.4) |

---

Abbreviations: ACC/AHA = American College of Cardiology/American Heart Association; NICE = United Kingdom's National Institute for Health and Care Excellence; WHO Hearts = World Health Organization Hearts/Package of Essential Noncommunicable disease interventions.

**Supplemental Table V:** Proportion of the population in need of BP-lowering medicines by guideline across WHO regions and sex

|                              |            | Undiagnosed |              | Diagnosed,<br>not taking medicines |            | Diagnosed,<br>taking medicines |              |
|------------------------------|------------|-------------|--------------|------------------------------------|------------|--------------------------------|--------------|
|                              |            | %           | 95% CI       | %                                  | 95% CI     | %                              | 95% CI       |
| <b>Female</b>                |            |             |              |                                    |            |                                |              |
| <i>Africa</i>                | ACC/AHA    | 21.0        | (20.2, 21.8) | 4.4                                | (4.1, 4.8) | 5.1                            | (4.8, 5.5)   |
|                              | 140/90     | 20.6        | (19.8, 21.4) | 4.4                                | (4.0, 4.7) | 4.9                            | (4.5, 5.2)   |
|                              | NICE       | 8.0         | (7.4, 8.5)   | 2.4                                | (2.2, 2.7) | 3.2                            | (2.9, 3.5)   |
|                              | WHO Hearts | 7.2         | (6.6, 7.8)   | 2.2                                | (2.0, 2.5) | 2.6                            | (2.3, 2.8)   |
| <i>Americas</i>              | ACC/AHA    | 11.1        | (10.3, 11.9) | 2.5                                | (2.1, 2.8) | 8.3                            | (7.8, 8.9)   |
|                              | 140/90     | 11.1        | (10.3, 11.9) | 2.4                                | (2.1, 2.8) | 8.3                            | (7.7, 8.8)   |
|                              | NICE       | 3.0         | (2.5, 3.4)   | 0.9                                | (0.7, 1.1) | 3.4                            | (3.0, 3.7)   |
|                              | WHO Hearts | 2.9         | (2.4, 3.3)   | 0.9                                | (0.7, 1.1) | 3.2                            | (2.9, 3.6)   |
| <i>Eastern Mediterranean</i> | ACC/AHA    | 19.2        | (18.5, 19.8) | 6.3                                | (5.9, 6.8) | 8.6                            | (8.1, 9.0)   |
|                              | 140/90     | 16.6        | (16.0, 17.3) | 5.7                                | (5.3, 6.1) | 7.7                            | (7.2, 8.1)   |
|                              | NICE       | 7.6         | (7.2, 8.0)   | 3.5                                | (3.2, 3.8) | 6.2                            | (5.8, 6.5)   |
|                              | WHO Hearts | 4.7         | (4.3, 5.0)   | 2.4                                | (2.2, 2.7) | 4.2                            | (3.8, 4.5)   |
| <i>Europe</i>                | ACC/AHA    | 16.9        | (16.1, 17.7) | 7.0                                | (6.5, 7.5) | 16.0                           | (15.4, 16.6) |
|                              | 140/90     | 16.1        | (15.4, 16.9) | 6.7                                | (6.3, 7.2) | 15.2                           | (14.6, 15.8) |
|                              | NICE       | 6.1         | (5.6, 6.5)   | 4.1                                | (3.7, 4.5) | 10.9                           | (10.4, 11.4) |
|                              | WHO Hearts | 5.0         | (4.5, 5.4)   | 3.4                                | (3.0, 3.7) | 8.5                            | (8.0, 9.0)   |
| <i>South-East Asia</i>       | ACC/AHA    | 24.8        | (24.6, 25.0) | 2.4                                | (2.3, 2.5) | 2.0                            | (1.9, 2.1)   |
|                              | 140/90     | 24.5        | (24.3, 24.7) | 2.4                                | (2.2, 2.5) | 2.0                            | (1.9, 2.1)   |
|                              | NICE       | 8.9         | (8.8, 9.1)   | 1.3                                | (1.2, 1.4) | 1.1                            | (1.1, 1.2)   |
|                              | WHO Hearts | 8.1         | (8.0, 8.3)   | 1.2                                | (1.2, 1.3) | 1.1                            | (1.0, 1.1)   |
| <i>Western Pacific</i>       | ACC/AHA    | 18.0        | (17.0, 19.0) | 1.3                                | (1.0, 1.6) | 6.9                            | (6.3, 7.5)   |
|                              | 140/90     | 15.8        | (14.7, 16.8) | 1.2                                | (0.9, 1.5) | 6.3                            | (5.7, 6.9)   |
|                              | NICE       | 6.5         | (5.8, 7.1)   | 0.8                                | (0.6, 1.0) | 4.7                            | (4.2, 5.3)   |



|                              |            |      |              |     |            |      |             |
|------------------------------|------------|------|--------------|-----|------------|------|-------------|
|                              | WHO Hearts | 3.8  | (3.3, 4.4)   | 0.6 | (0.4, 0.8) | 3.3  | (2.8, 3.7)  |
| <b>Male</b>                  |            |      |              |     |            |      |             |
| <i>Africa</i>                | ACC/AHA    | 26.8 | (25.7, 27.8) | 2.8 | (2.4, 3.2) | 3.0  | (2.7, 3.3)  |
|                              | 140/90     | 25.4 | (24.4, 26.5) | 2.7 | (2.3, 3.1) | 2.8  | (2.4, 3.1)  |
|                              | NICE       | 9.5  | (8.8, 10.2)  | 1.8 | (1.4, 2.1) | 1.9  | (1.6, 2.2)  |
|                              | WHO Hearts | 7.7  | (7.0, 8.4)   | 1.5 | (1.2, 1.8) | 1.4  | (1.2, 1.7)  |
| <i>Americas</i>              | ACC/AHA    | 19.9 | (18.6, 21.2) | 2.9 | (2.5, 3.3) | 6.5  | (5.9, 7.1)  |
|                              | 140/90     | 19.3 | (18.0, 20.6) | 2.8 | (2.4, 3.3) | 6.3  | (5.8, 6.9)  |
|                              | NICE       | 5.9  | (5.2, 6.7)   | 1.5 | (1.2, 1.8) | 3.3  | (2.9, 3.7)  |
|                              | WHO Hearts | 4.5  | (3.8, 5.2)   | 1.3 | (0.9, 1.6) | 2.7  | (2.3, 3.0)  |
| <i>Eastern Mediterranean</i> | ACC/AHA    | 25.4 | (24.4, 26.3) | 4.9 | (4.4, 5.4) | 5.2  | (4.7, 5.6)  |
|                              | 140/90     | 19.9 | (19.0, 20.9) | 4.3 | (3.9, 4.8) | 4.3  | (3.9, 4.7)  |
|                              | NICE       | 10.5 | (9.9, 11.2)  | 3.3 | (2.8, 3.7) | 3.7  | (3.3, 4.0)  |
|                              | WHO Hearts | 6.5  | (5.9, 7.0)   | 2.3 | (1.9, 2.6) | 2.6  | (2.4, 2.9)  |
| <i>Europe</i>                | ACC/AHA    | 26.9 | (25.9, 27.9) | 8.2 | (7.5, 9.0) | 10.2 | (9.6, 10.8) |
|                              | 140/90     | 21.9 | (20.9, 22.8) | 7.6 | (6.9, 8.3) | 9.3  | (8.7, 9.9)  |
|                              | NICE       | 11.5 | (10.8, 12.2) | 5.7 | (5.1, 6.3) | 8.1  | (7.5, 8.6)  |
|                              | WHO Hearts | 7.5  | (6.8, 8.1)   | 4.5 | (4.0, 5.1) | 6.5  | (6.0, 7.0)  |
| <i>South-East Asia</i>       | ACC/AHA    | 29.1 | (28.9, 29.4) | 1.3 | (1.2, 1.4) | 1.2  | (1.1, 1.3)  |
|                              | 140/90     | 27.7 | (27.4, 27.9) | 1.3 | (1.2, 1.4) | 1.1  | (1.0, 1.2)  |
|                              | NICE       | 11.1 | (11.0, 11.3) | 0.8 | (0.8, 0.9) | 0.7  | (0.7, 0.8)  |
|                              | WHO Hearts | 8.4  | (8.3, 8.6)   | 0.7 | (0.7, 0.8) | 0.5  | (0.5, 0.6)  |
| <i>Western Pacific</i>       | ACC/AHA    | 30.0 | (28.4, 31.6) | 1.9 | (1.5, 2.4) | 7.2  | (6.5, 7.9)  |
|                              | 140/90     | 24.8 | (23.2, 26.4) | 1.8 | (1.4, 2.3) | 6.3  | (5.7, 7.0)  |
|                              | NICE       | 12.9 | (11.8, 13.9) | 1.3 | (1.0, 1.7) | 5.2  | (4.6, 5.7)  |
|                              | WHO Hearts | 8.4  | (7.5, 9.3)   | 1.0 | (0.7, 1.2) | 3.2  | (2.7, 3.7)  |

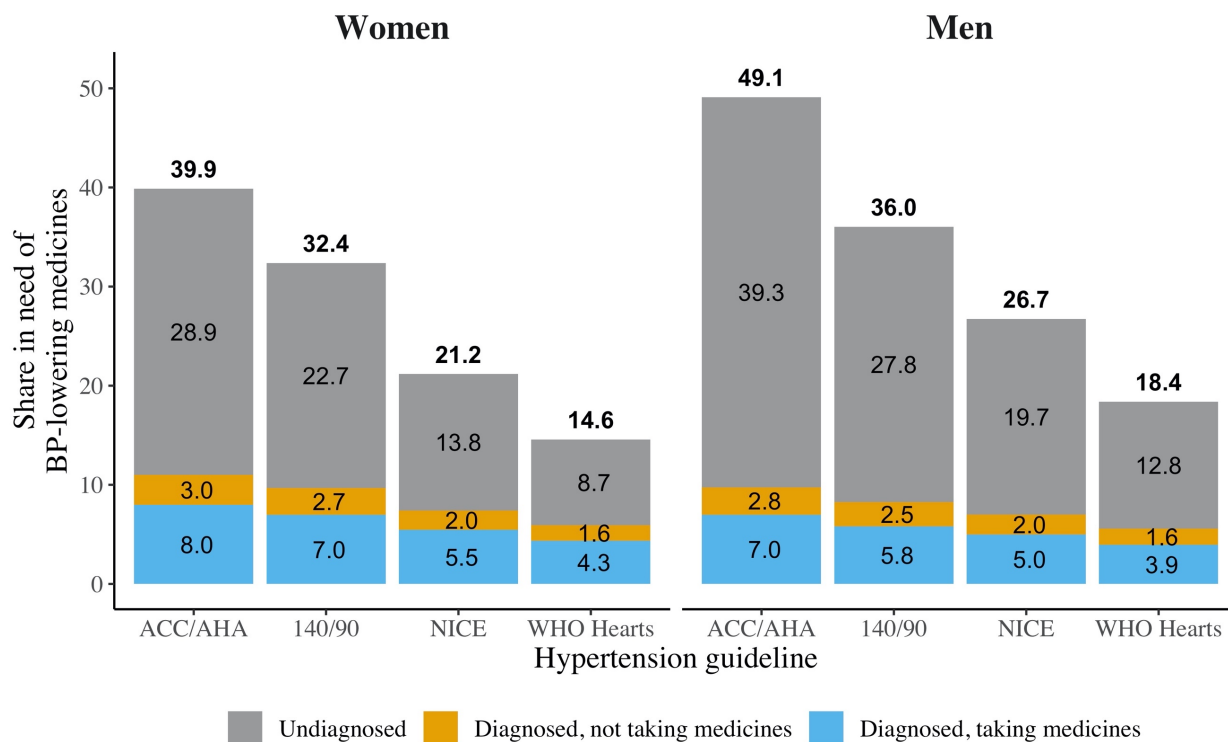

**Supplemental Figure I:** Proportion (%) of adults ages 40-70 from 50 low- and middle-income countries in need of BP-lowering medicines by hypertension treatment guidelines, stages of hypertension care, and sex using the Globorisk CVD risk score. Countries are weighted by proportionate size of their 40-70 population.

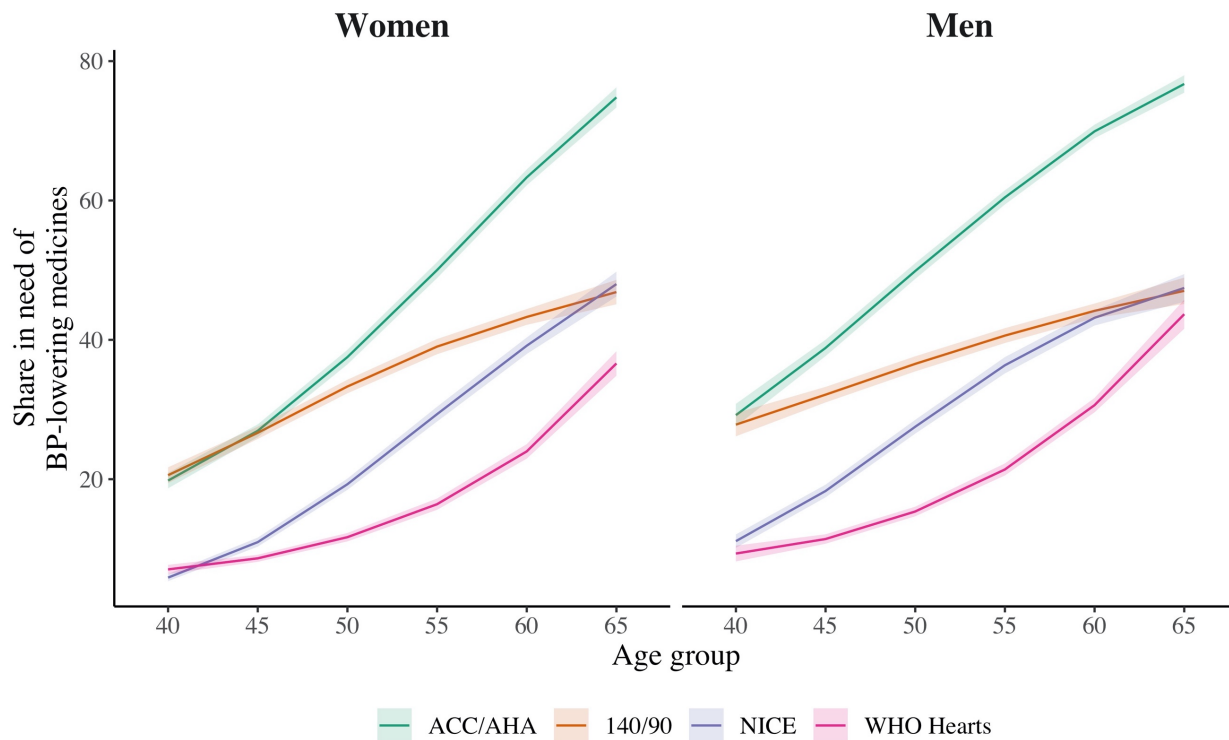

**Supplemental Figure II:** Proportion of the population ages 40-70 in need of BP-lowering medicines by guideline across age groups and sex using the Globorisk CVD risk score. Shaded areas are 95% confidence intervals.

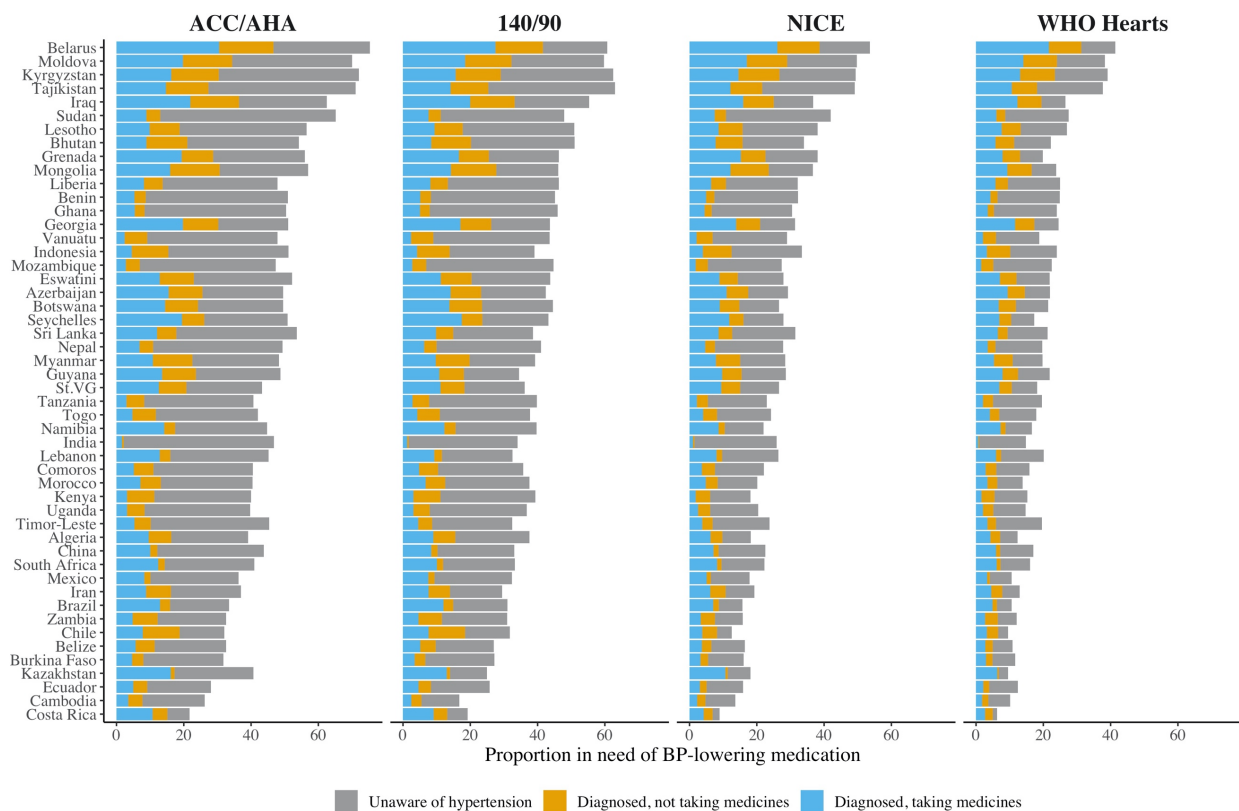

**Supplemental Figure III:** Proportion of adults ages 30-70 from 50 low- and middle-income countries in need of BP-lowering medicines by hypertension treatment guideline and stages of the hypertension care using the Globorisk CVD score.

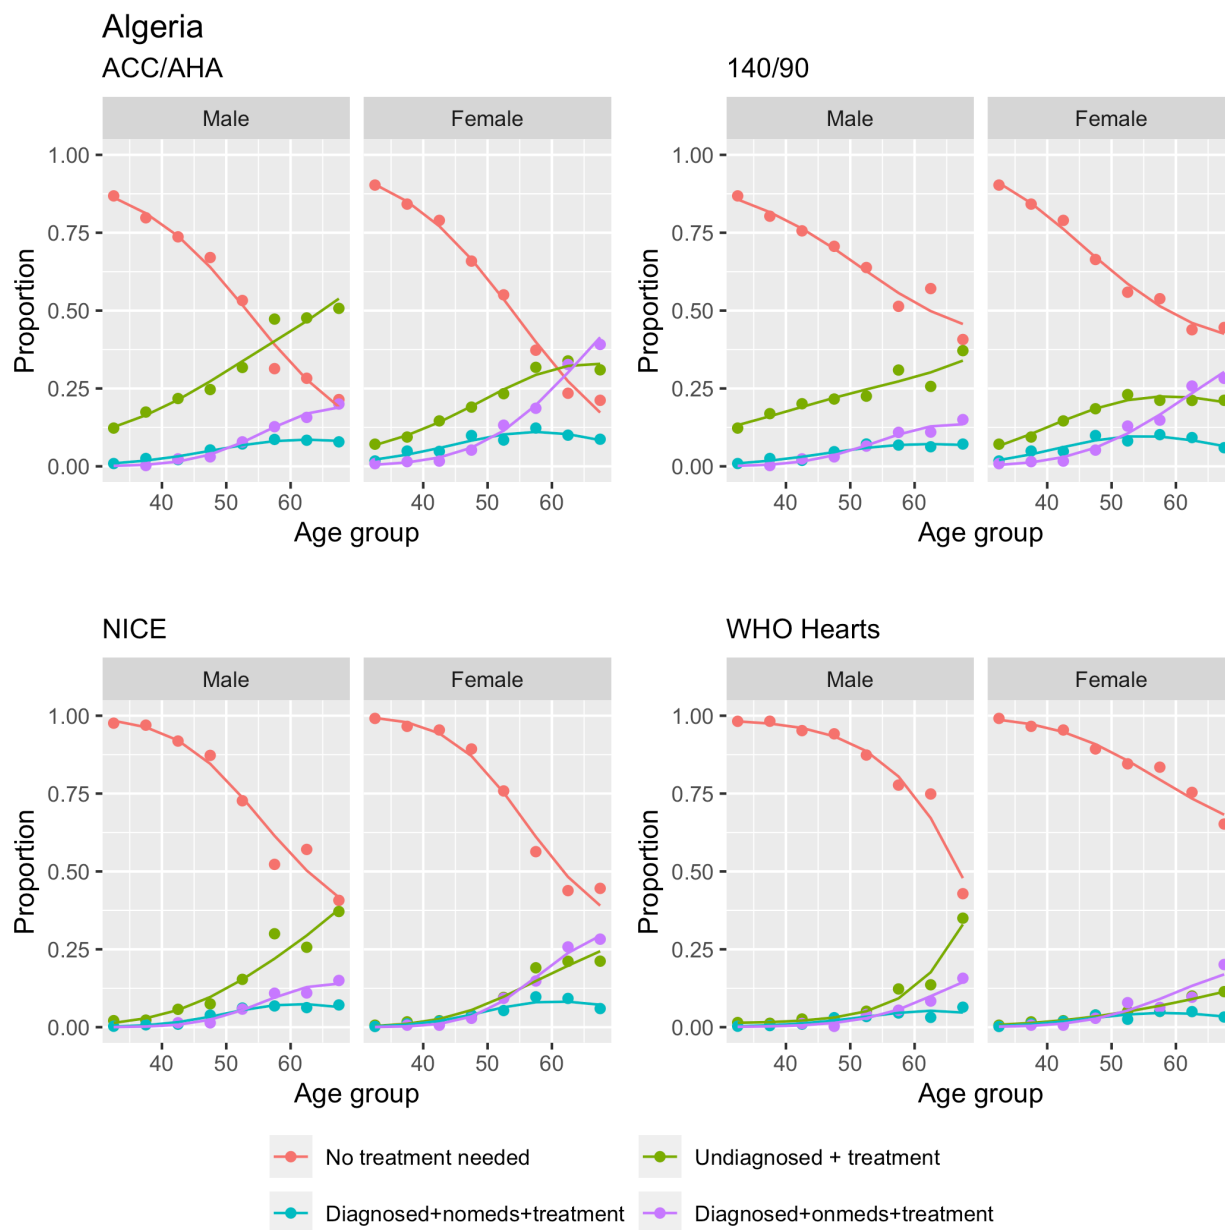

**Supplemental Figure IV:** Regression model fit of treatment need by age for Algeria. Lines are the model predicted proportions and the dots are the raw proportions by 5-year age group.

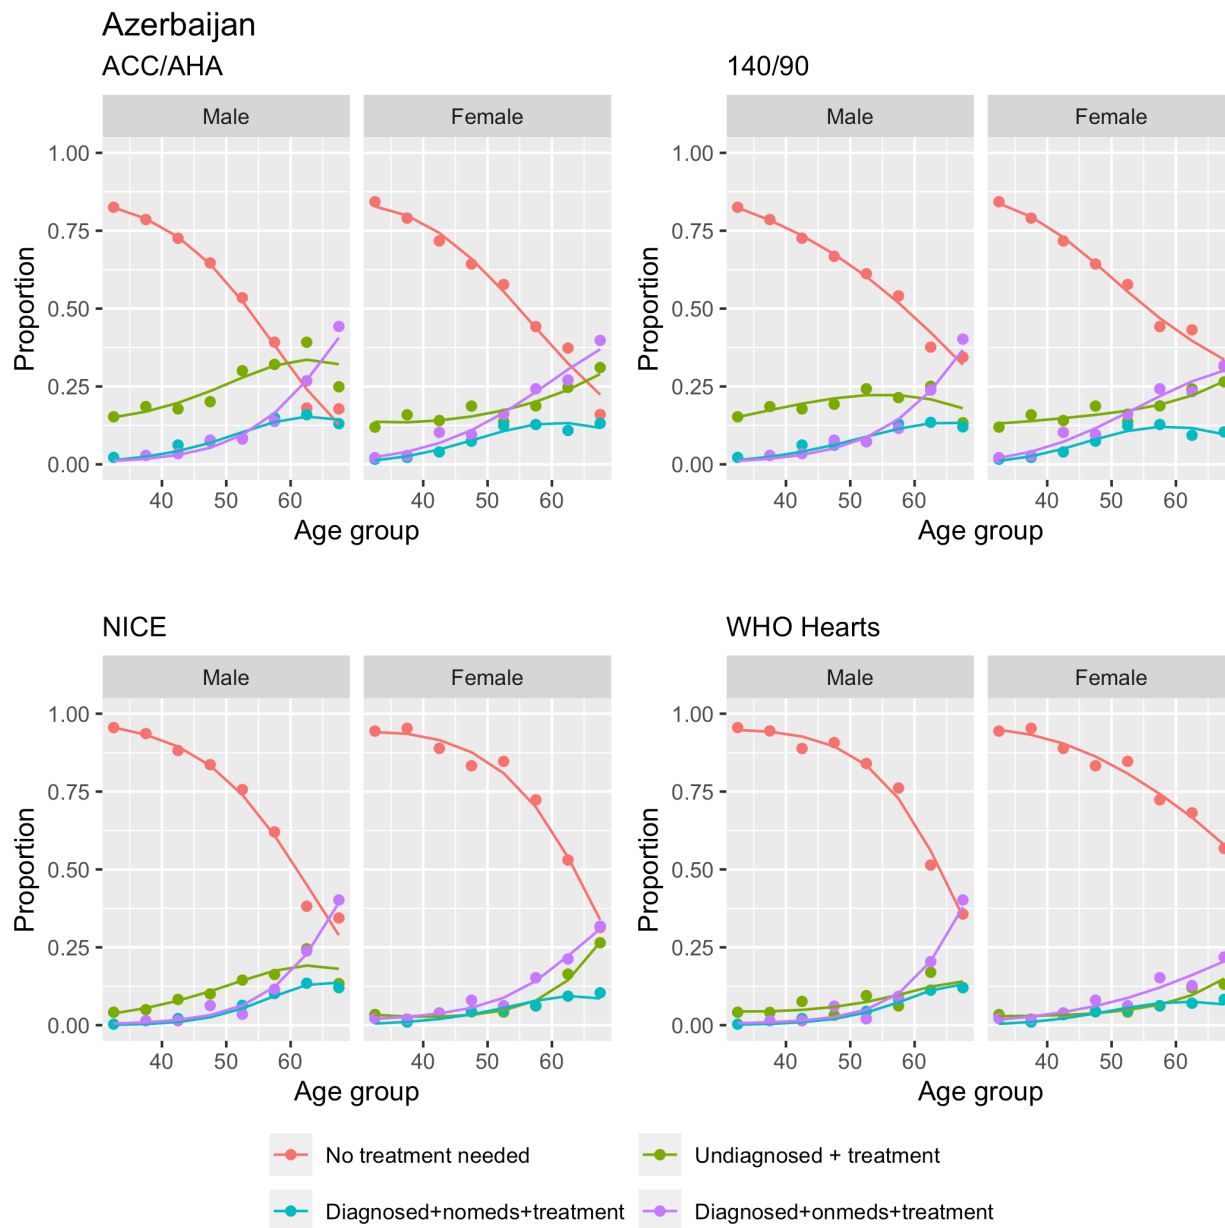

**Supplemental Figure V:** Regression model fit of treatment need by age for Azerbaijan. Lines are the model predicted proportions and the dots are the raw proportions by 5-year age group.

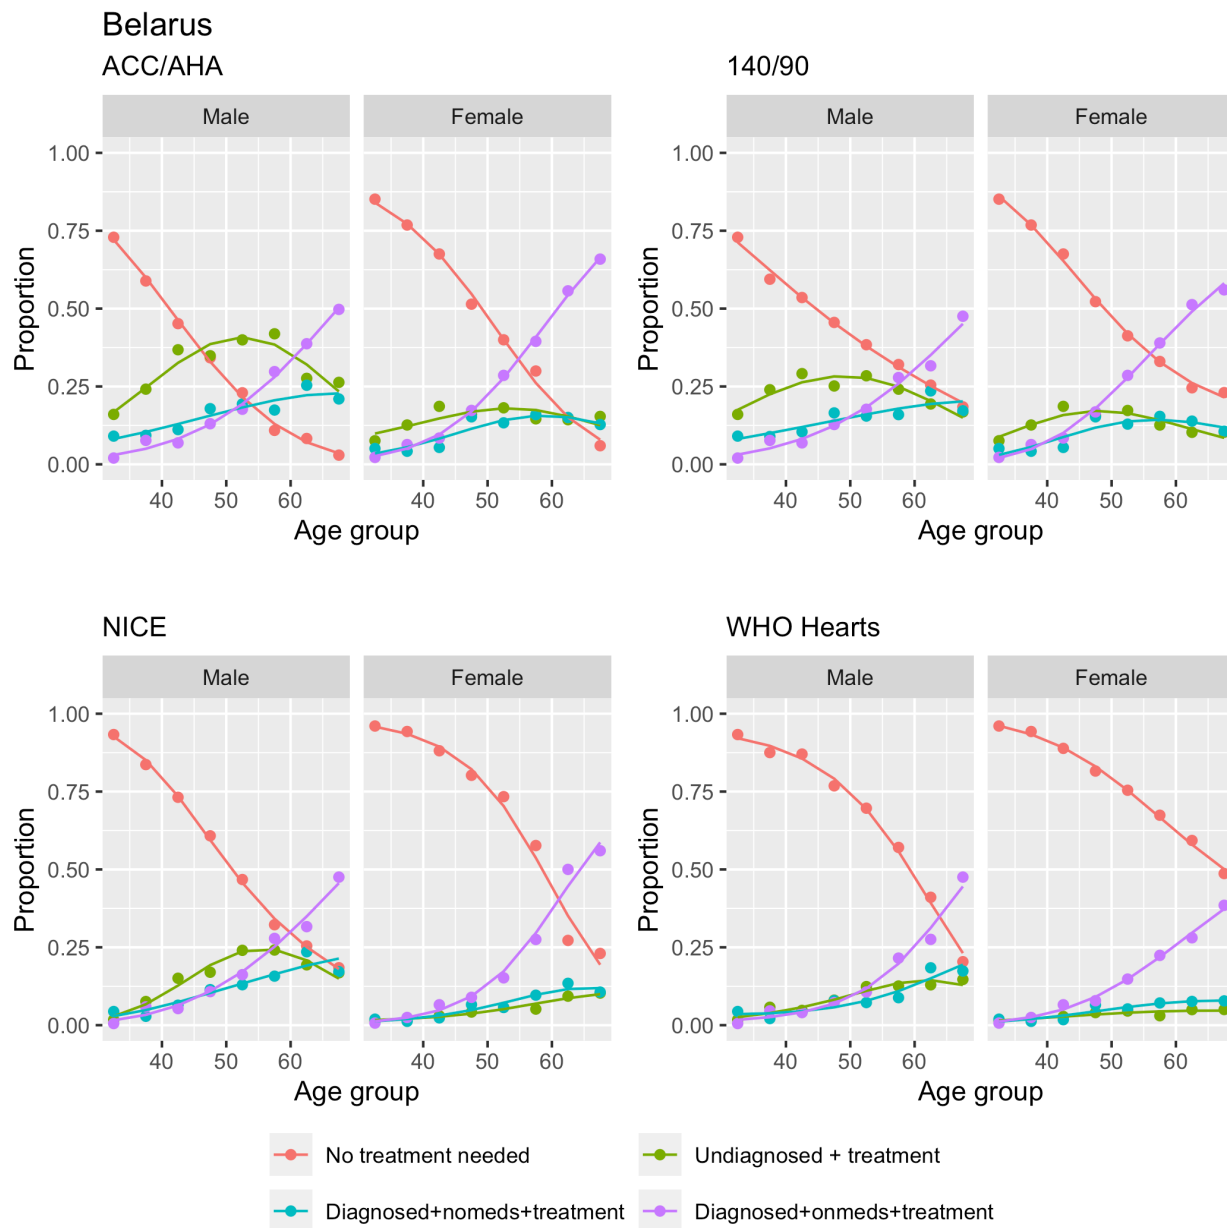

**Supplemental Figure VI:** Regression model fit of treatment need by age for Belarus. Lines are the model predicted proportions and the dots are the raw proportions by 5-year age group.

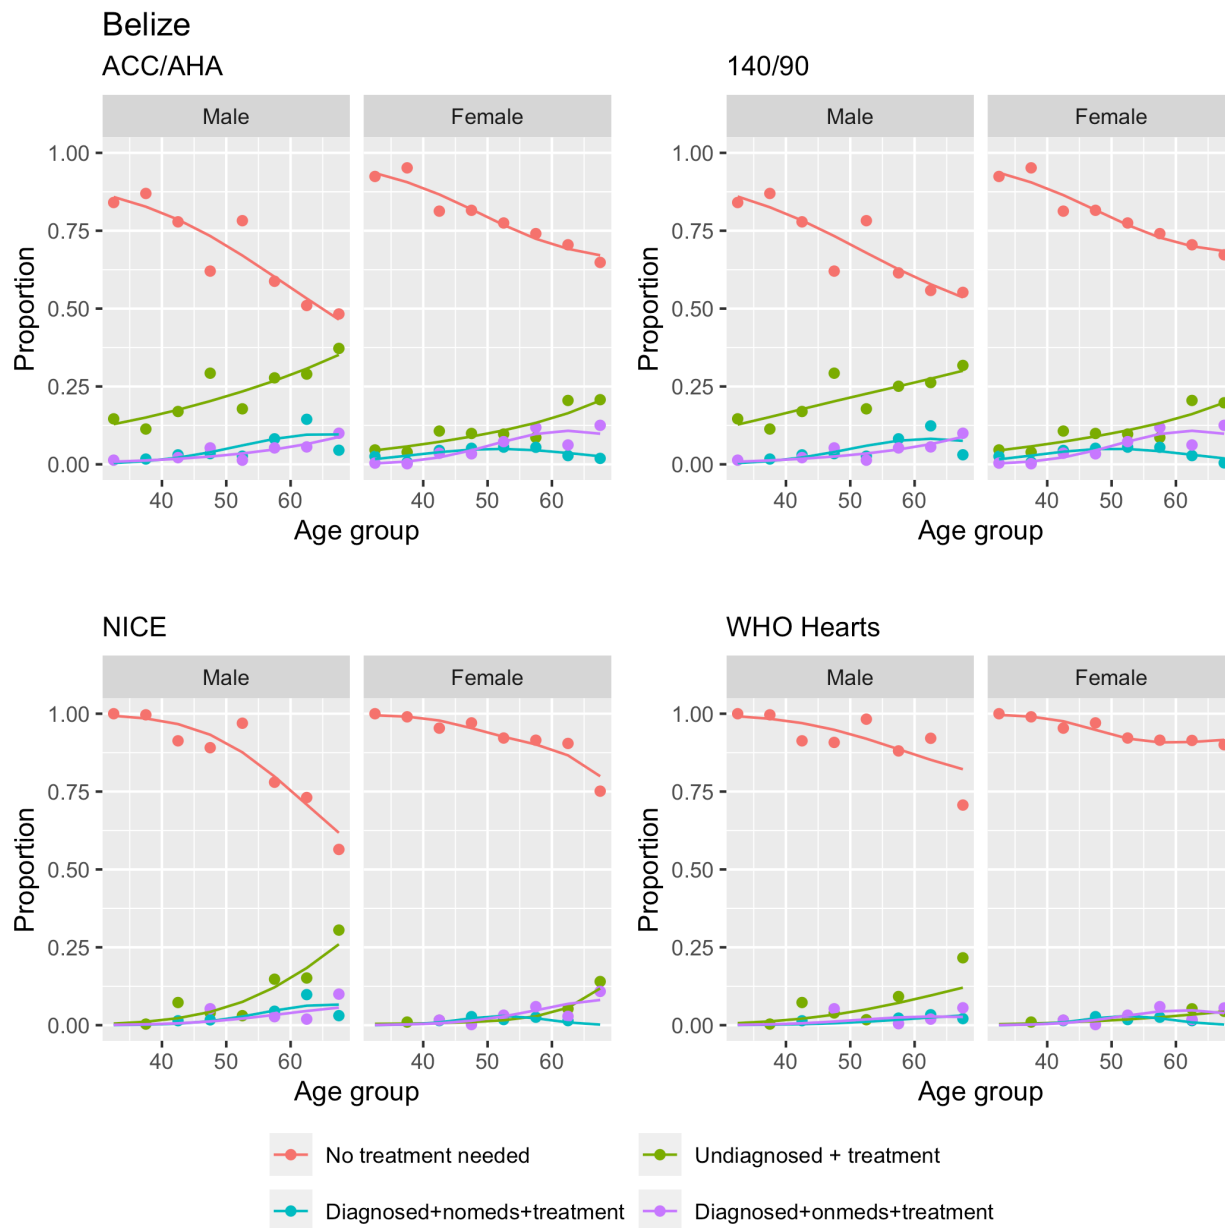

**Supplemental Figure VII:** Regression model fit of treatment need by age for Belize. Lines are the model predicted proportions and the dots are the raw proportions by 5-year age group.



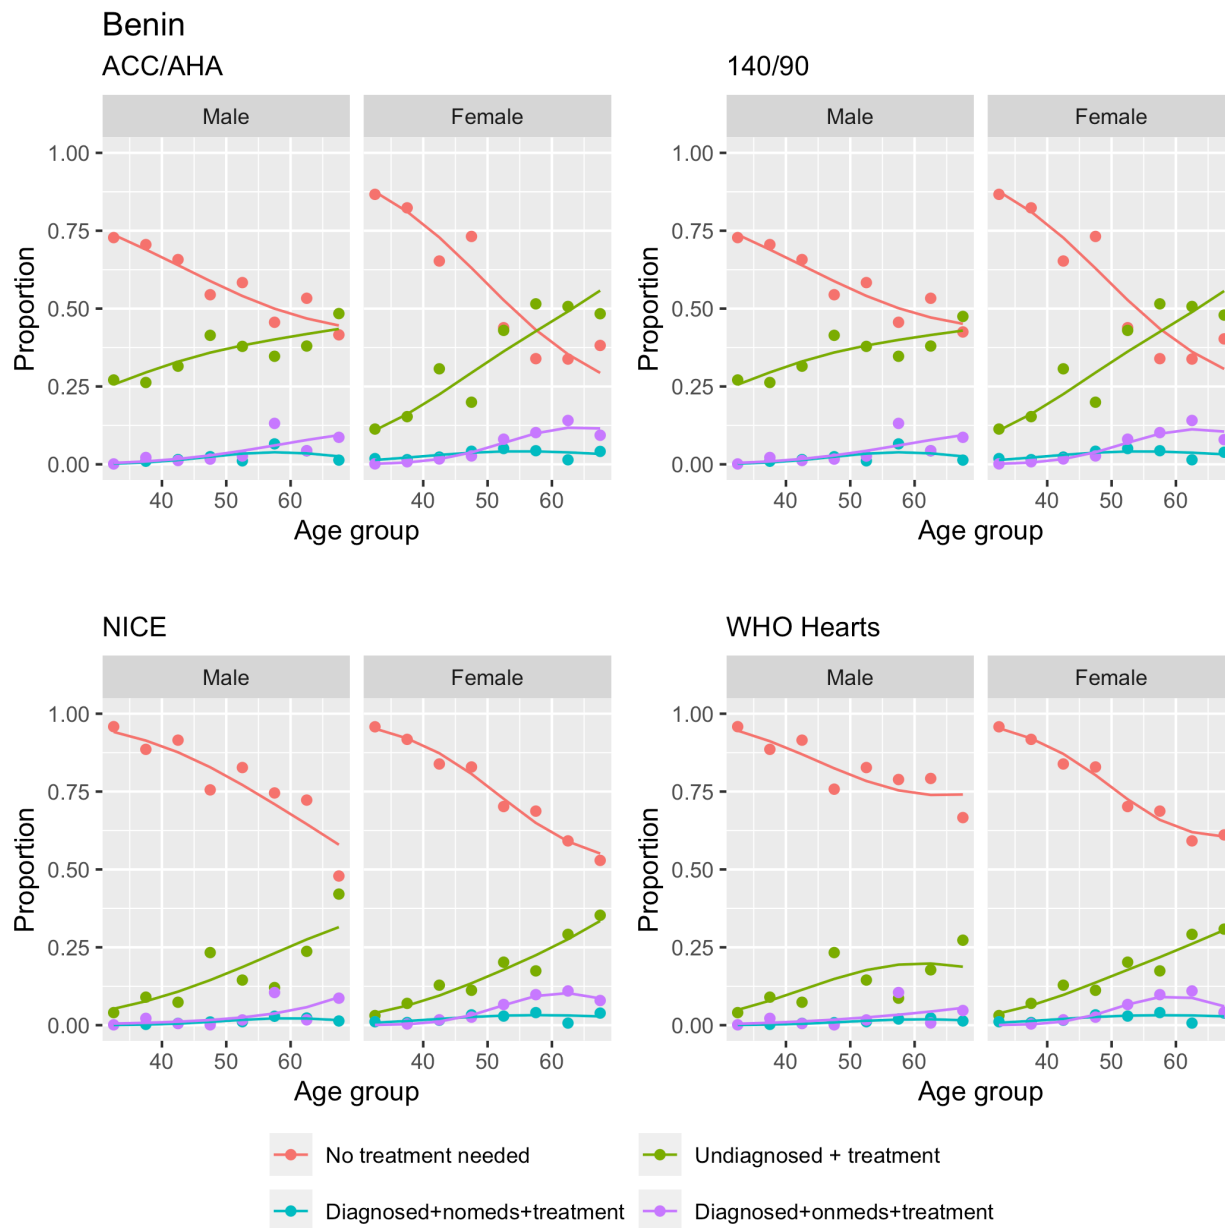

**Supplemental Figure VIII:** Regression model fit of treatment need by age for Benin. Lines are the model predicted proportions and the dots are the raw proportions by 5-year age group.

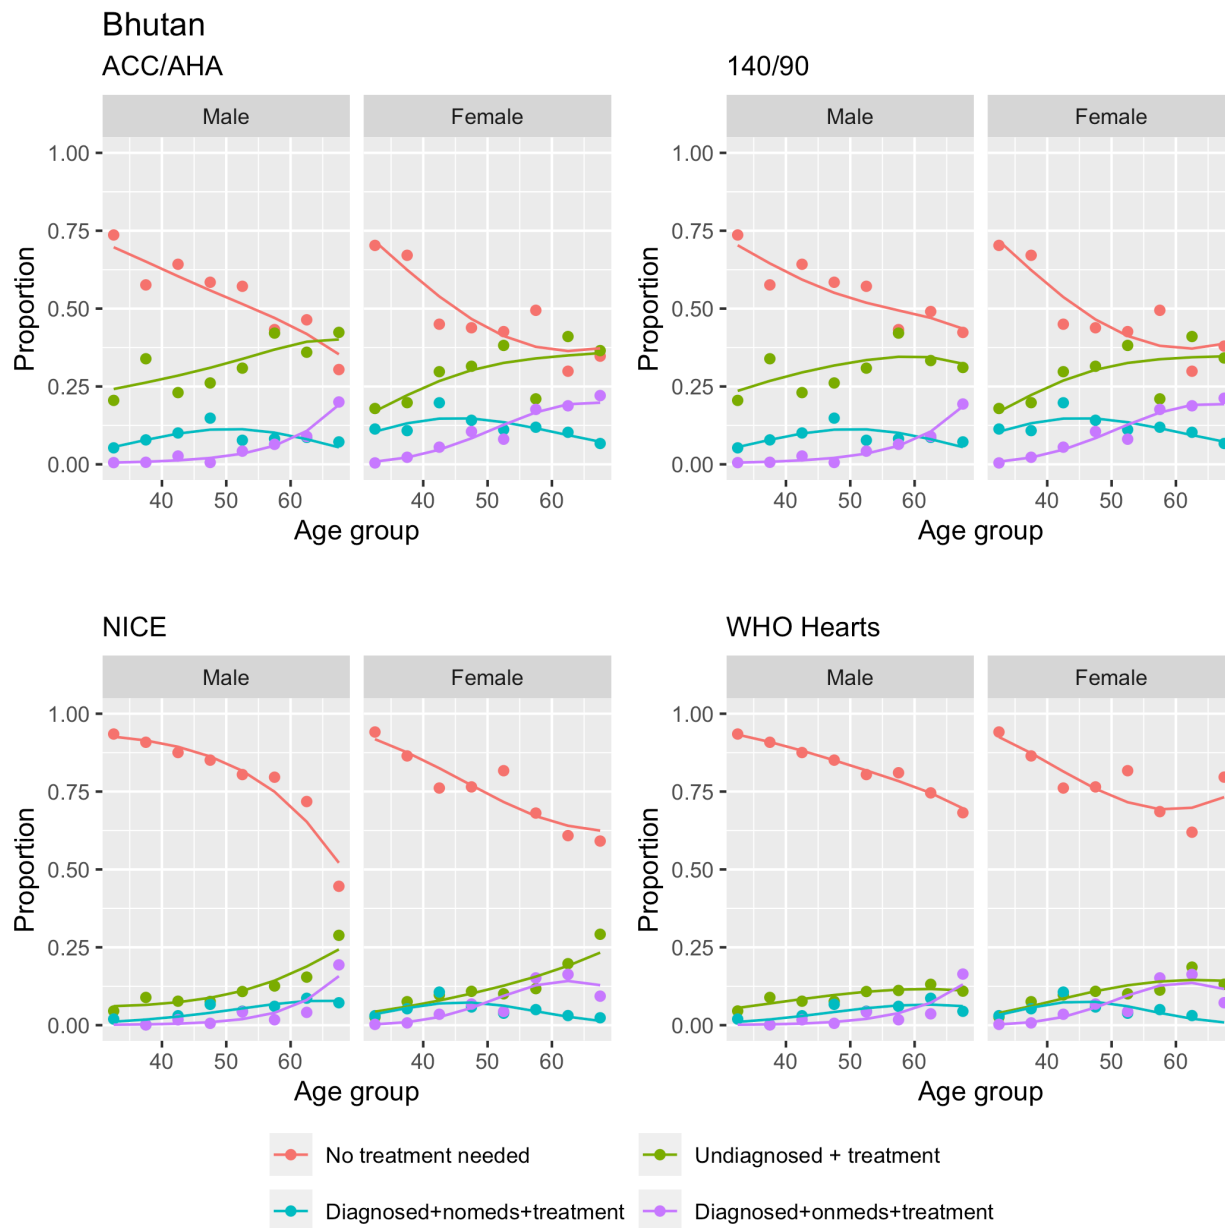

**Supplemental Figure IX:** Regression model fit of treatment need by age for Bhutan. Lines are the model predicted proportions and the dots are the raw proportions by 5-year age group.

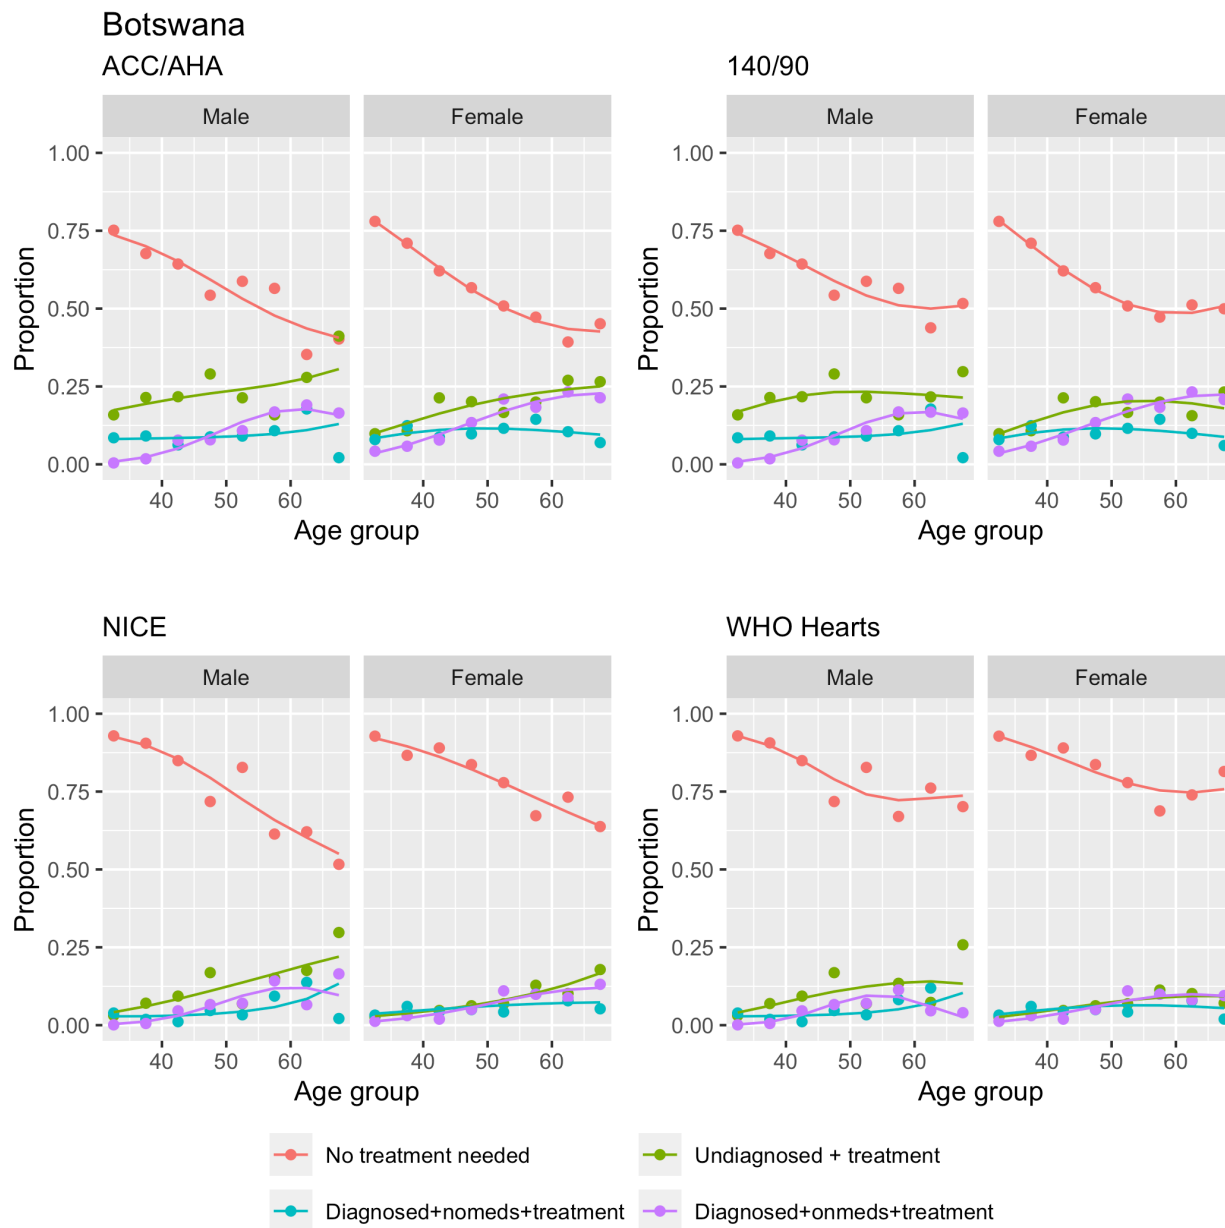

**Supplemental Figure X:** Regression model fit of treatment need by age for Botswana. Lines are the model predicted proportions and the dots are the raw proportions by 5-year age group.

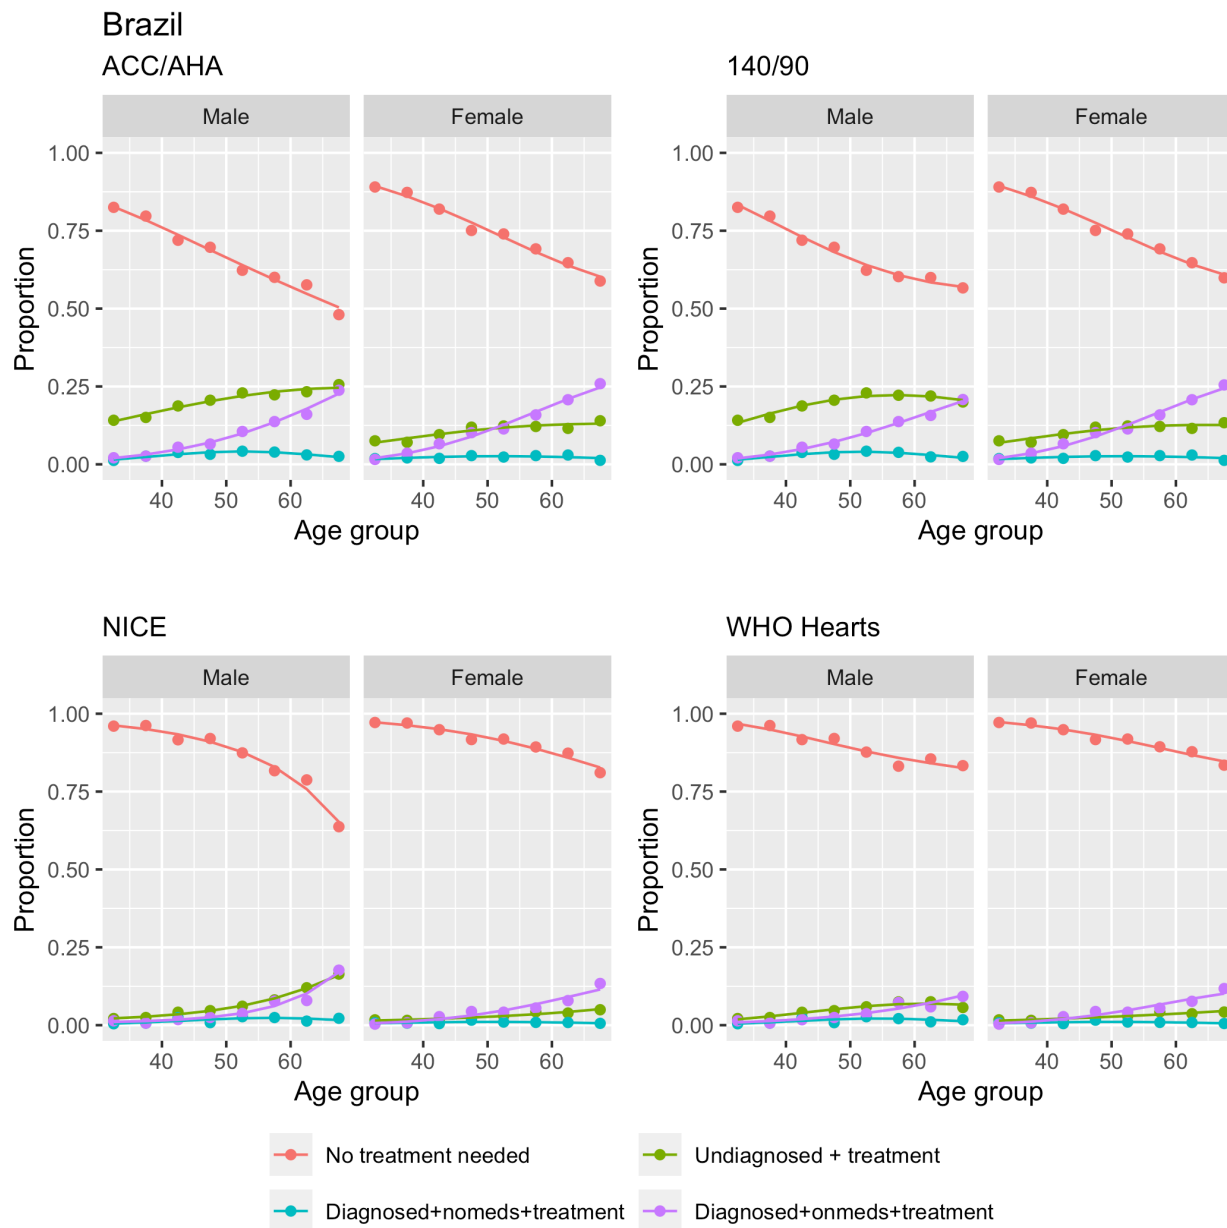

**Supplemental Figure XI:** Regression model fit of treatment need by age for Brazil. Lines are the model predicted proportions and the dots are the raw proportions by 5-year age group.



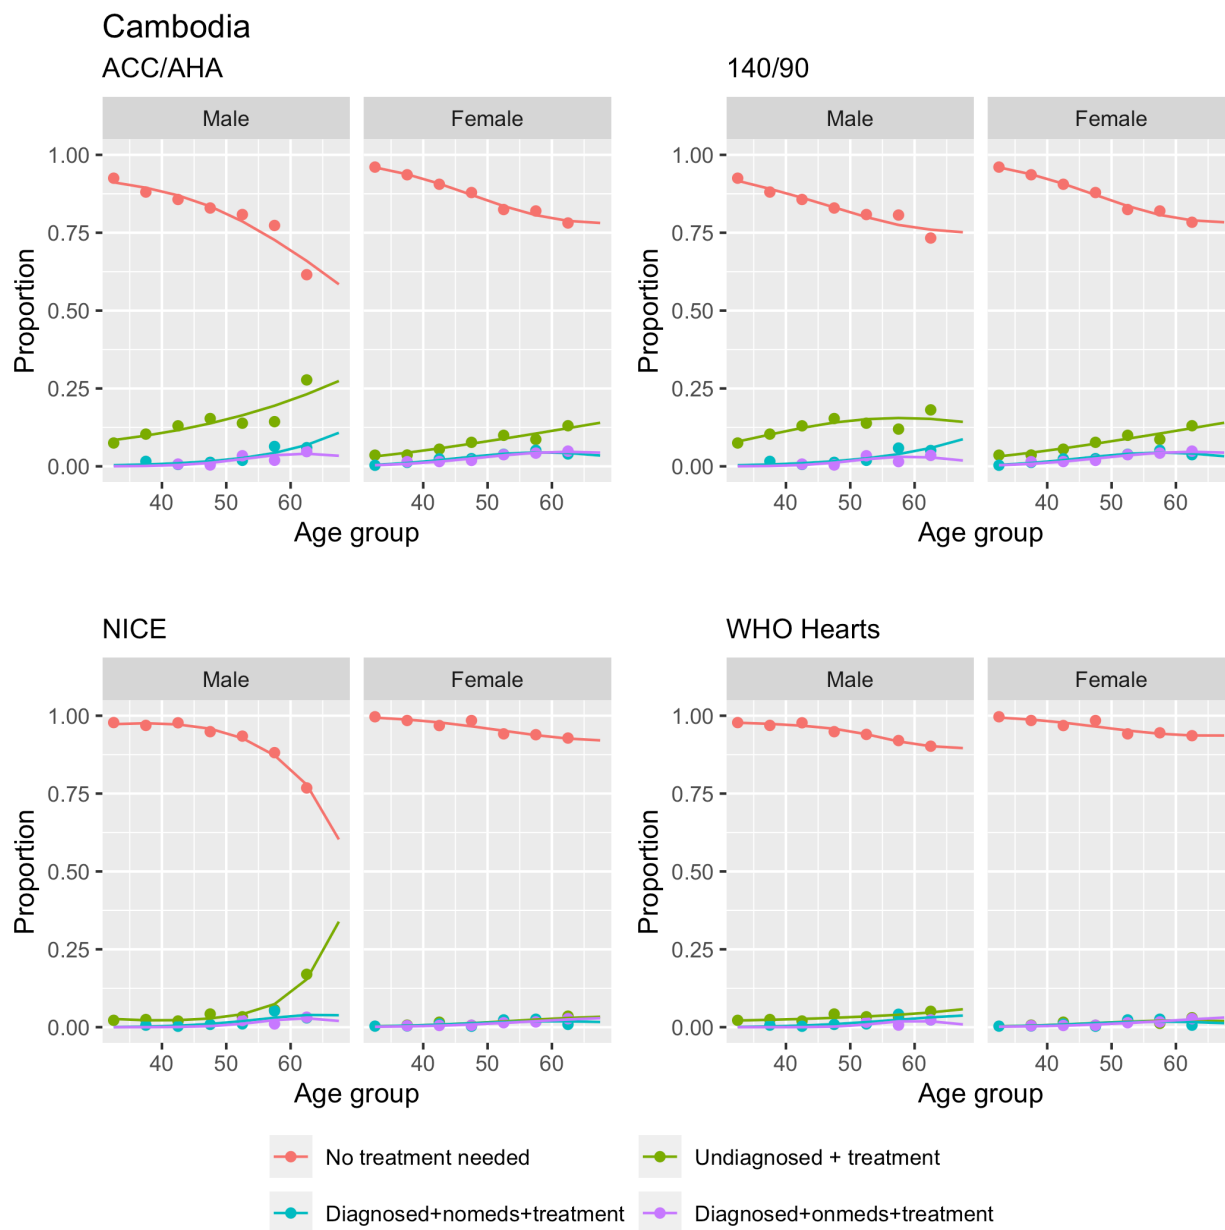

**Supplemental Figure XIII:** Regression model fit of treatment need by age for Cambodia. Lines are the model predicted proportions and the dots are the raw proportions by 5-year age group.

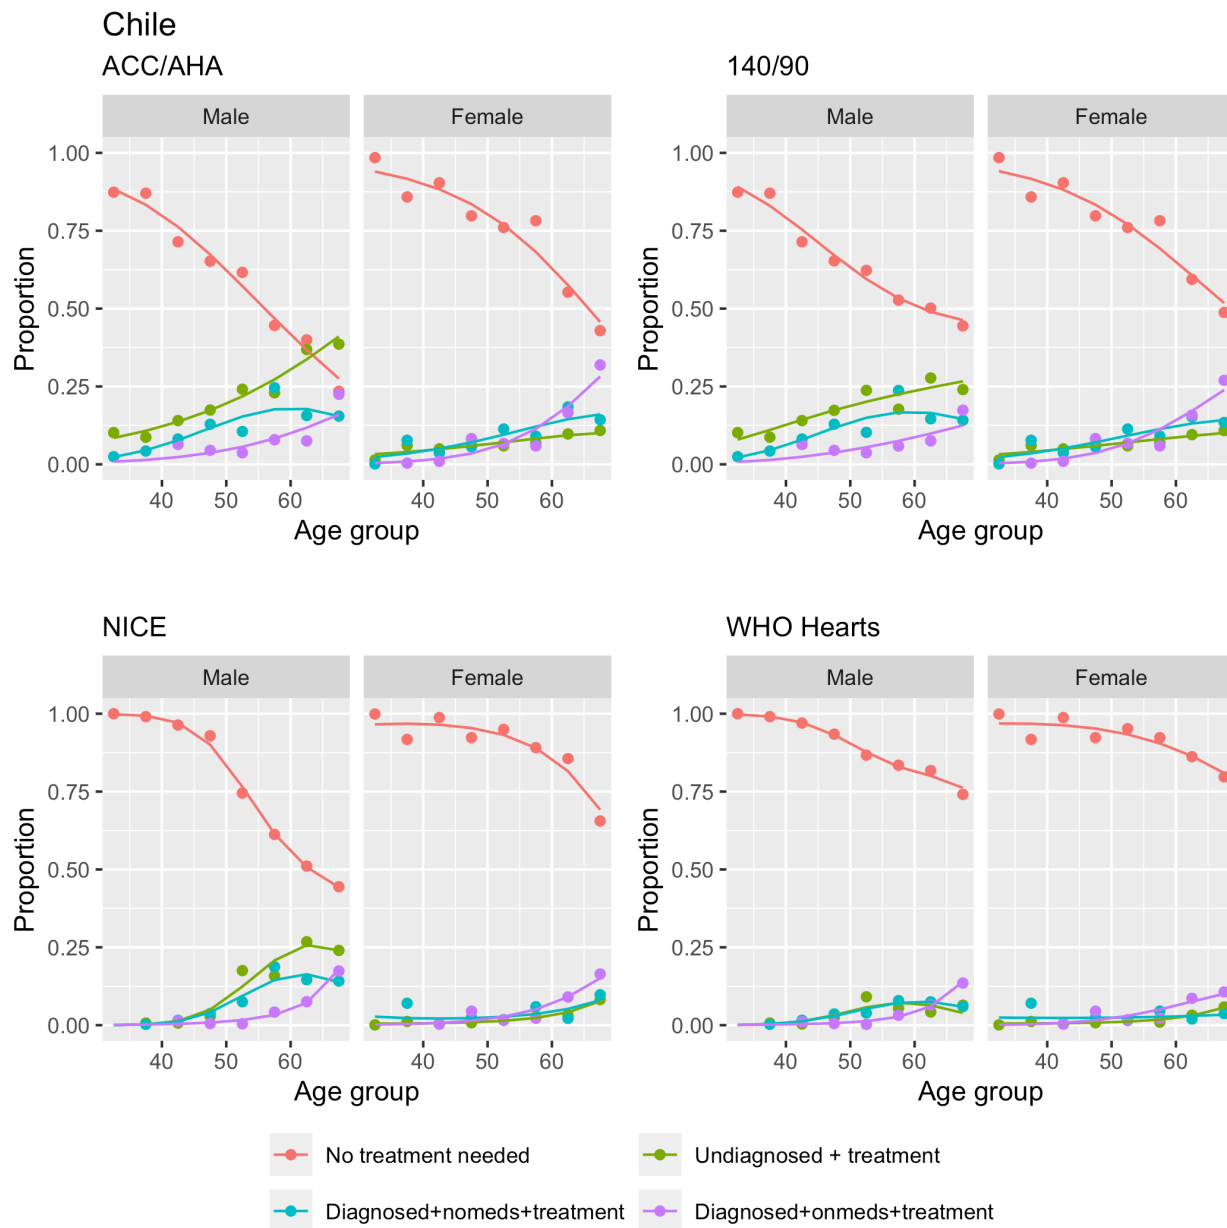

**Supplemental Figure XIV:** Regression model fit of treatment need by age for Chile. Lines are the model predicted proportions and the dots are the raw proportions by 5-year age group.

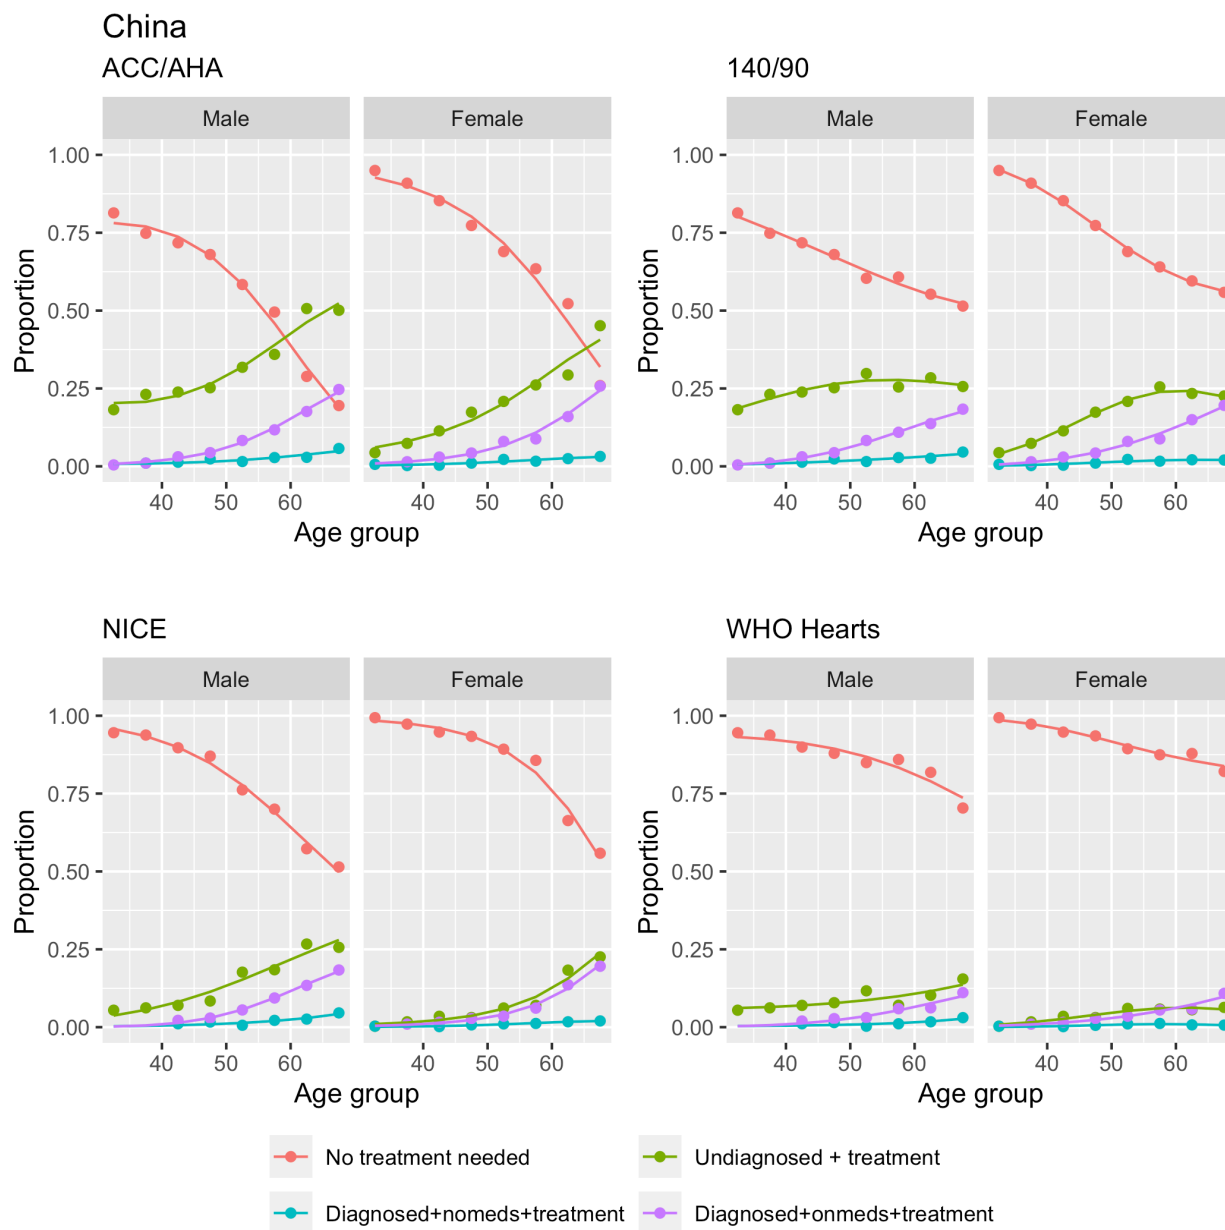

**Supplemental Figure XV:** Regression model fit of treatment need by age for China. Lines are the model predicted proportions and the dots are the raw proportions by 5-year age group.



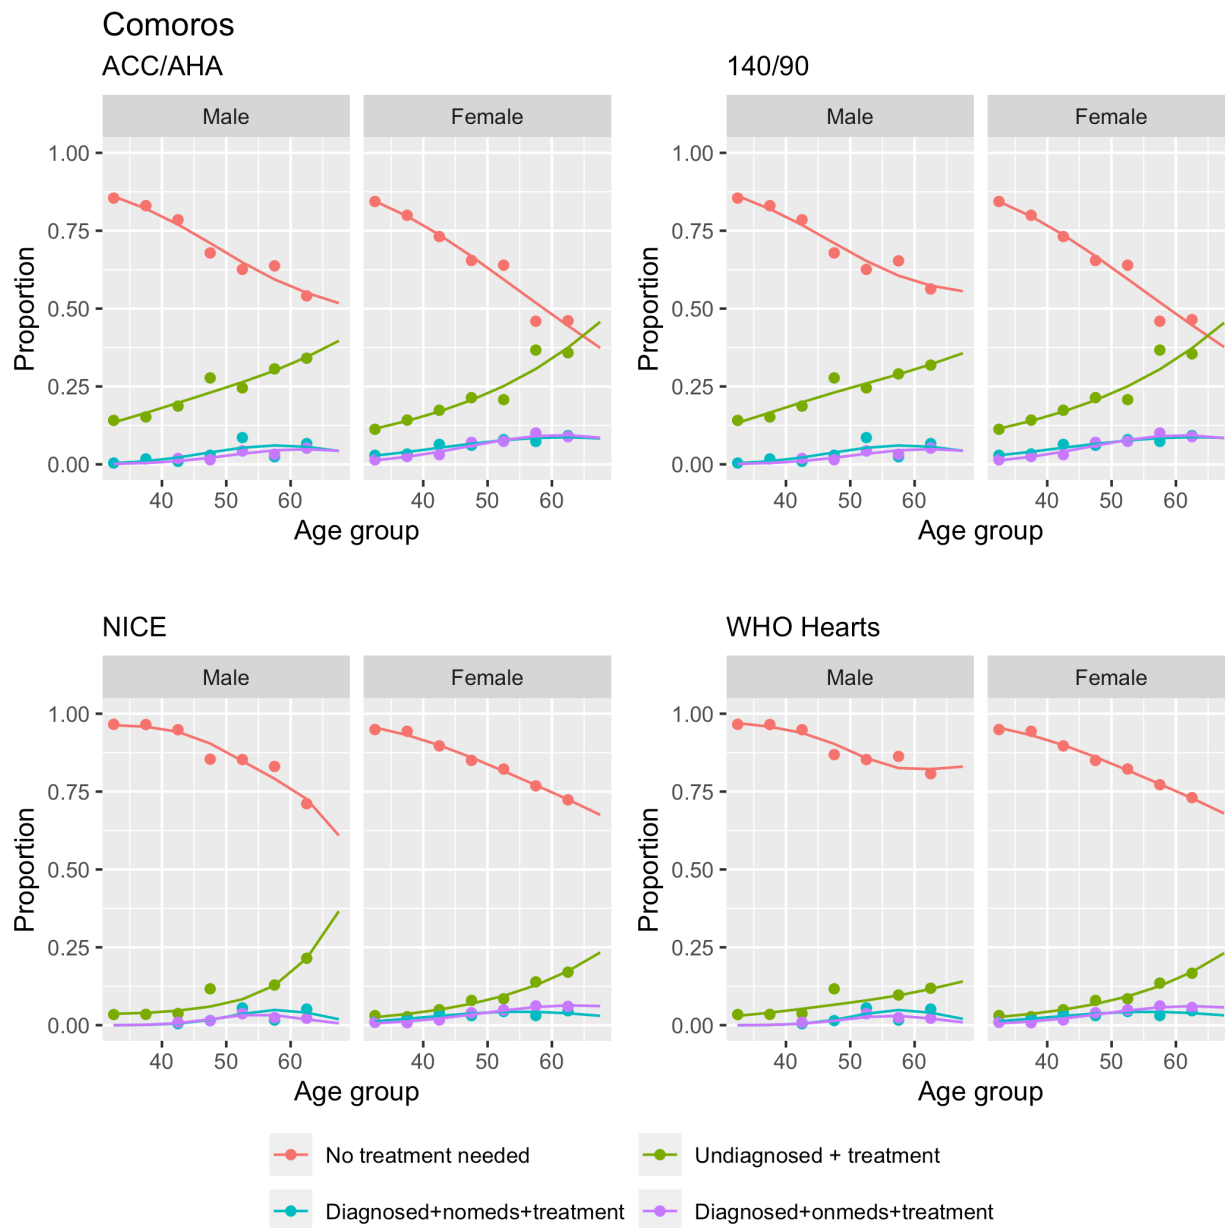

**Supplemental Figure XVI:** Regression model fit of treatment need by age for Comoros. Lines are the model predicted proportions and the dots are the raw proportions by 5-year age group.

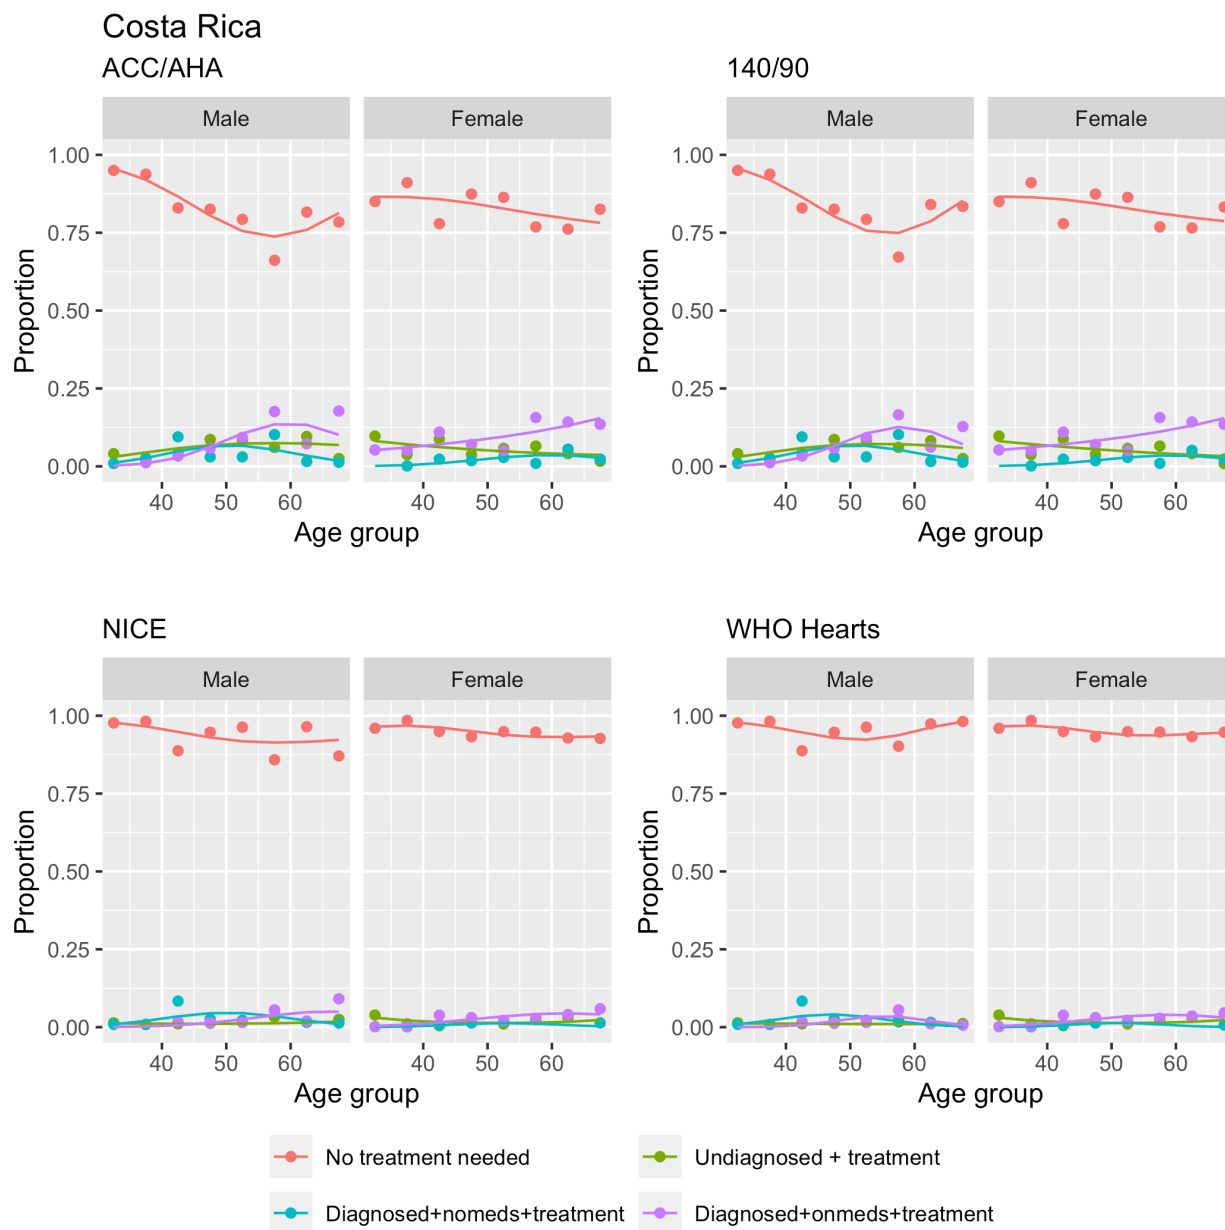

**Supplemental Figure XVII:** Regression model fit of treatment need by age for Costa Rica. Lines are the model predicted proportions and the dots are the raw proportions by 5-year age group.

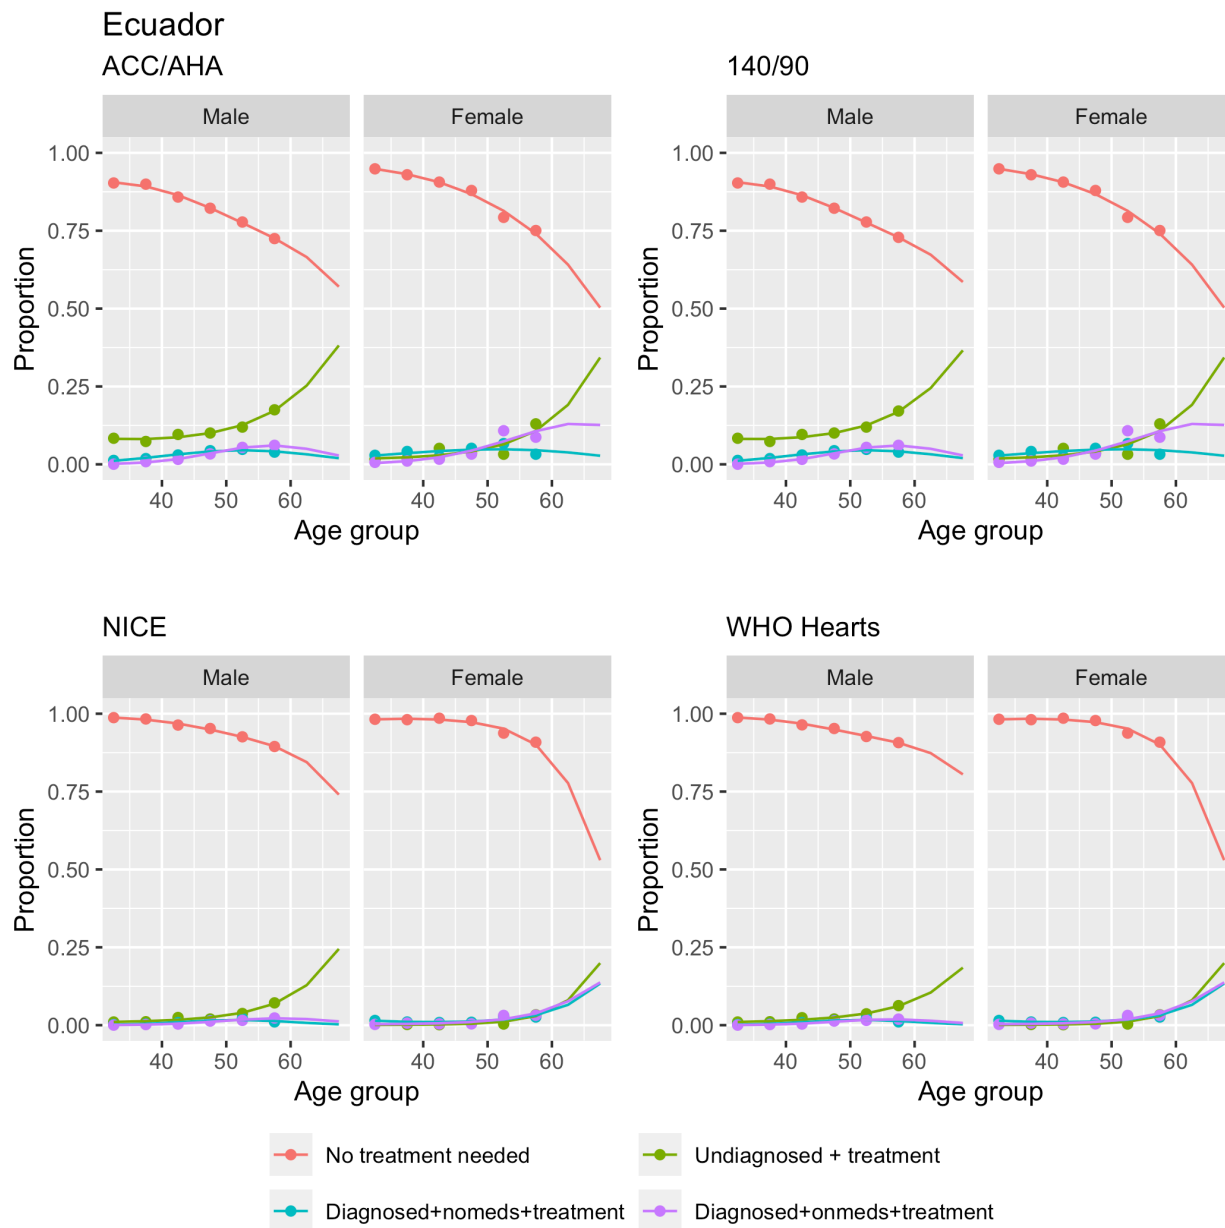

**Supplemental Figure XVIII:** Regression model fit of treatment need by age for Ecuador. Lines are the model predicted proportions and the dots are the raw proportions by 5-year age group.

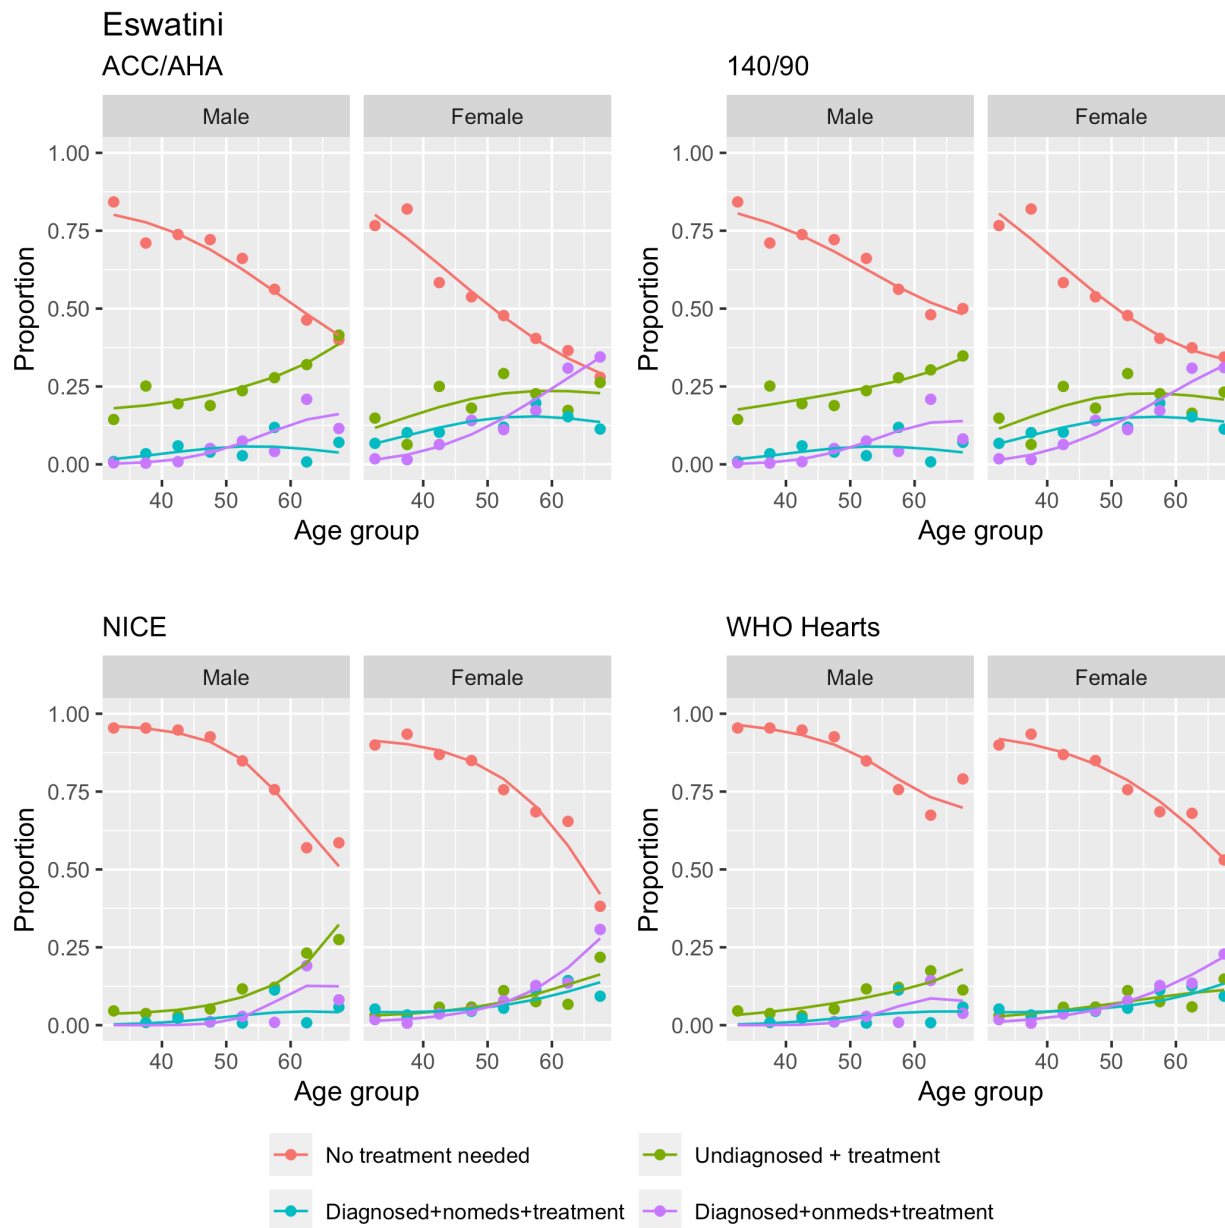

**Supplemental Figure XIX:** Regression model fit of treatment need by age for Eswatini. Lines are the model predicted proportions and the dots are the raw proportions by 5-year age group.

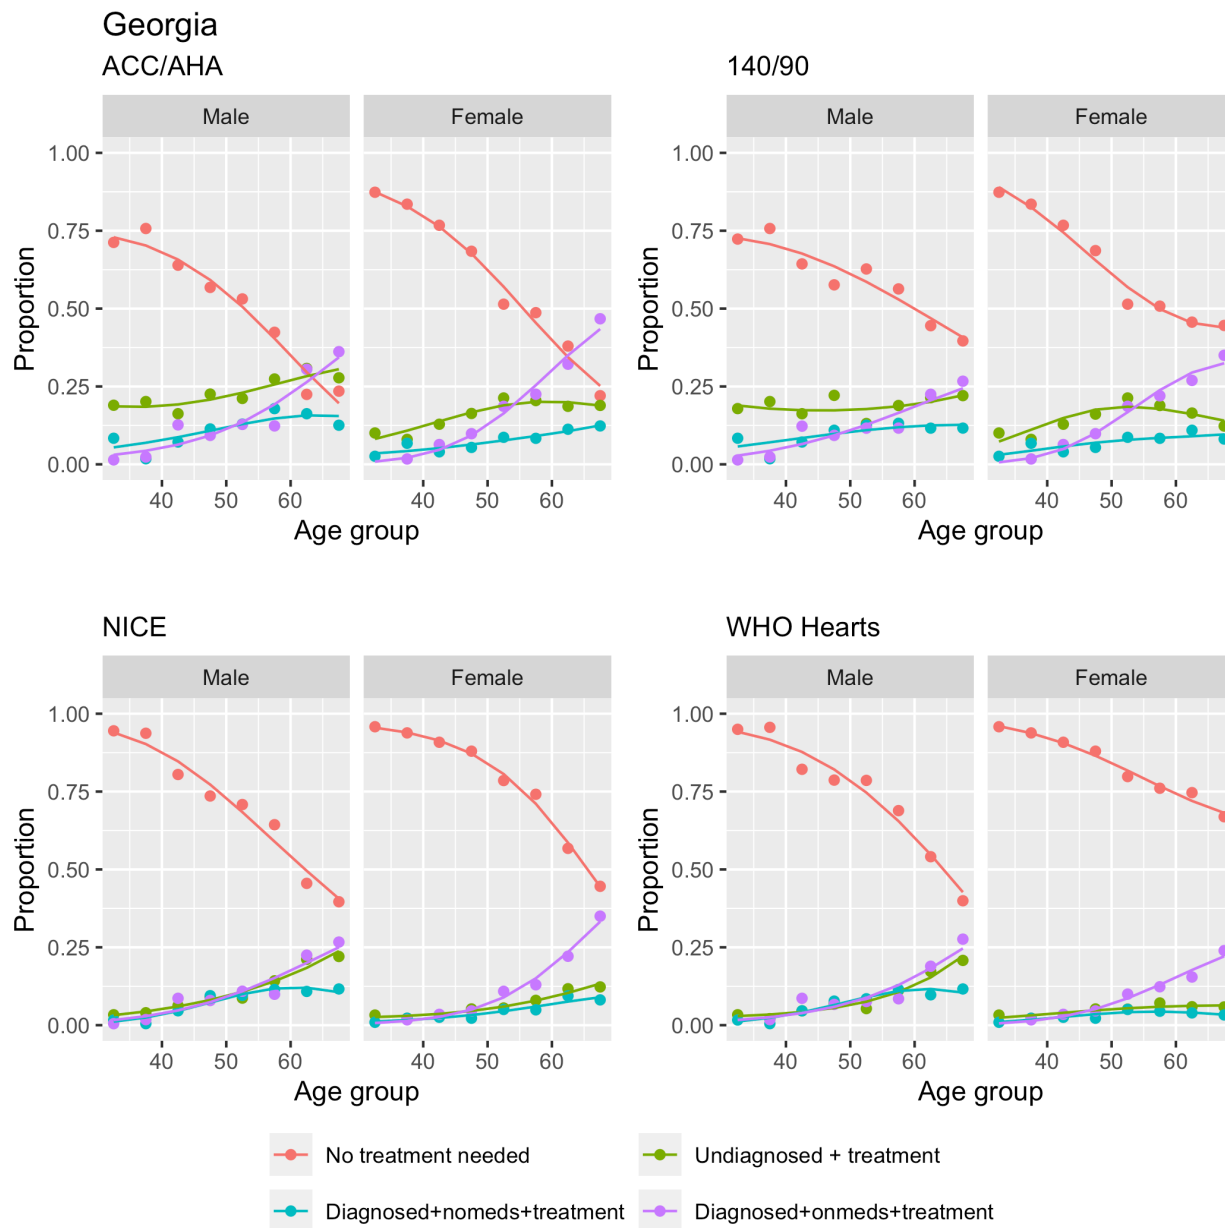

**Supplemental Figure XX:** Regression model fit of treatment need by age for Georgia. Lines are the model predicted proportions and the dots are the raw proportions by 5-year age group.

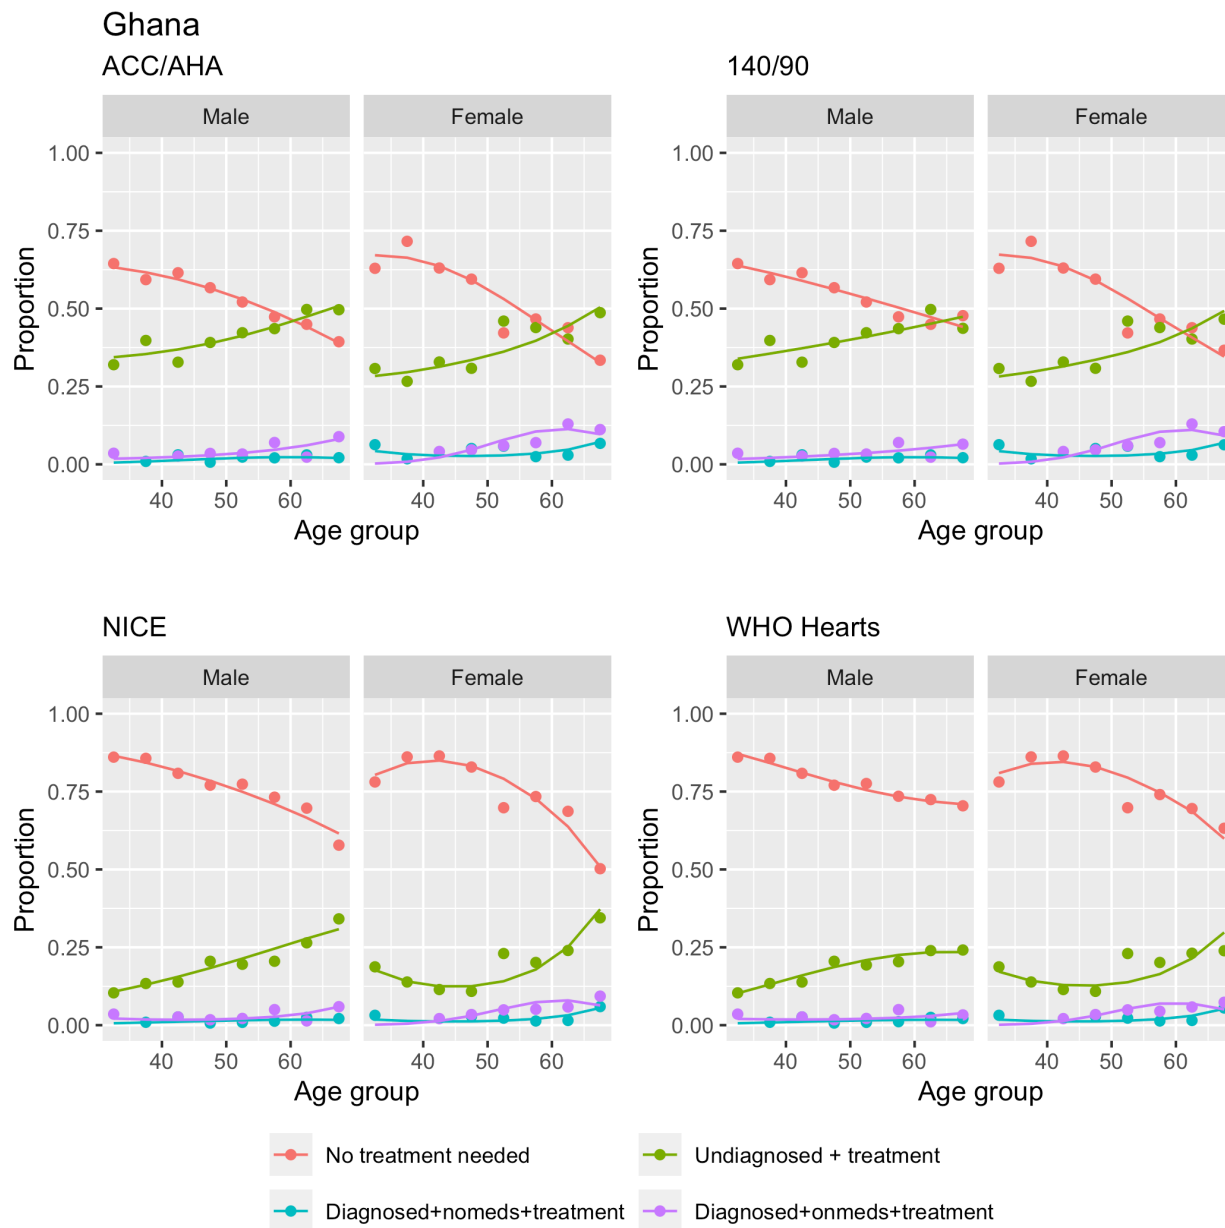

**Supplemental Figure XXI:** Regression model fit of treatment need by age for Ghana. Lines are the model predicted proportions and the dots are the raw proportions by 5-year age group.

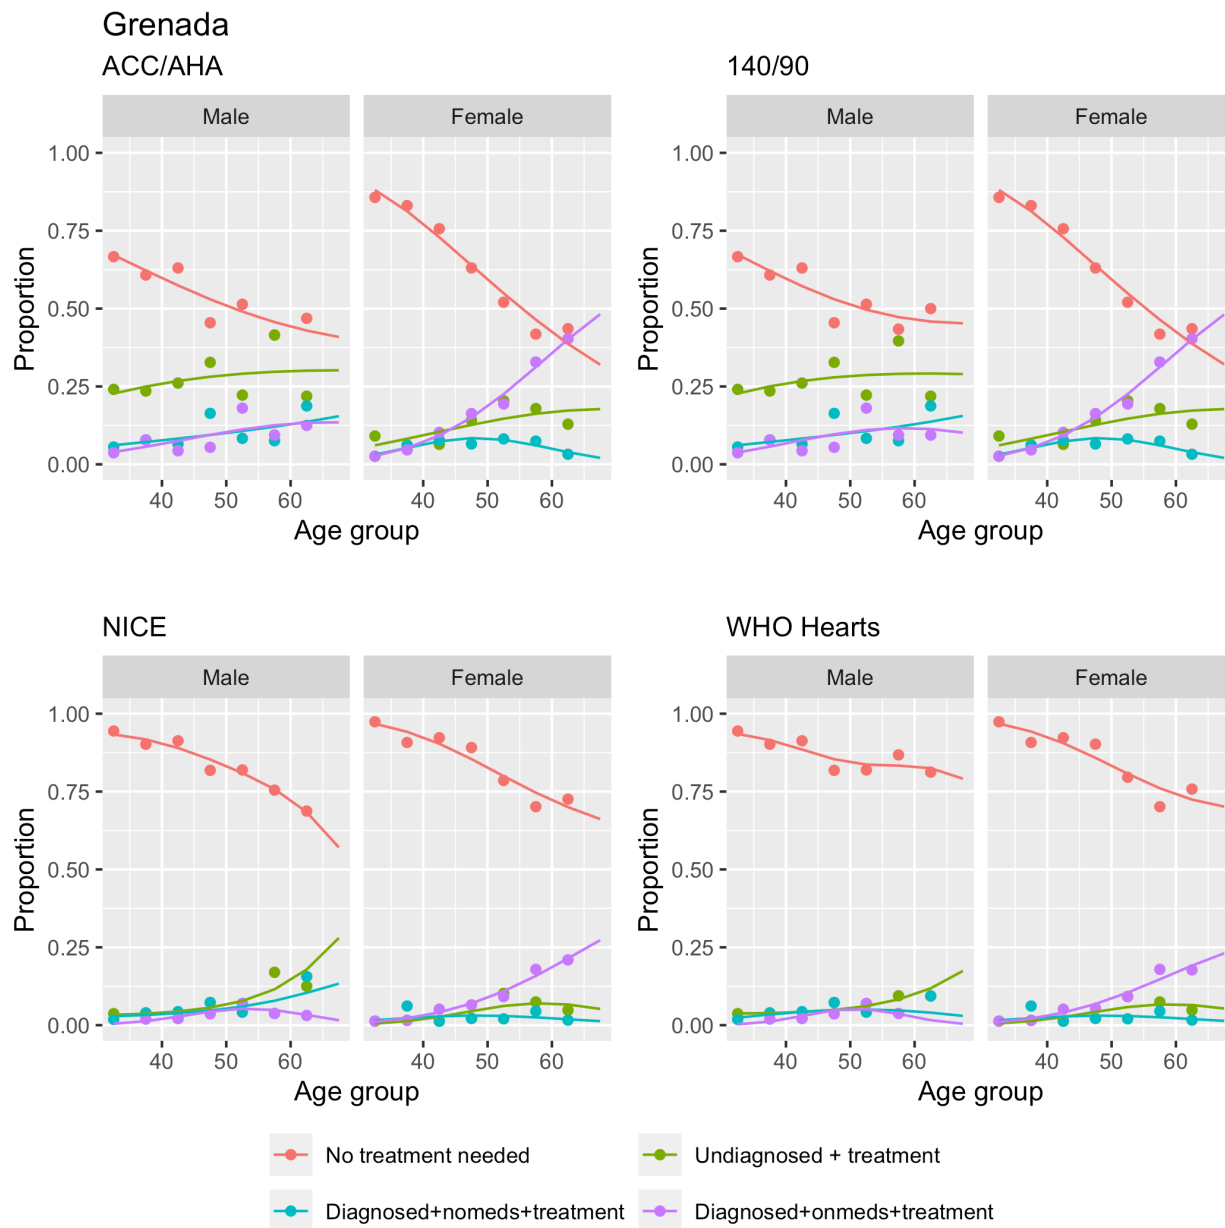

**Supplemental Figure XXII:** Regression model fit of treatment need by age for Grenada. Lines are the model predicted proportions and the dots are the raw proportions by 5-year age group.

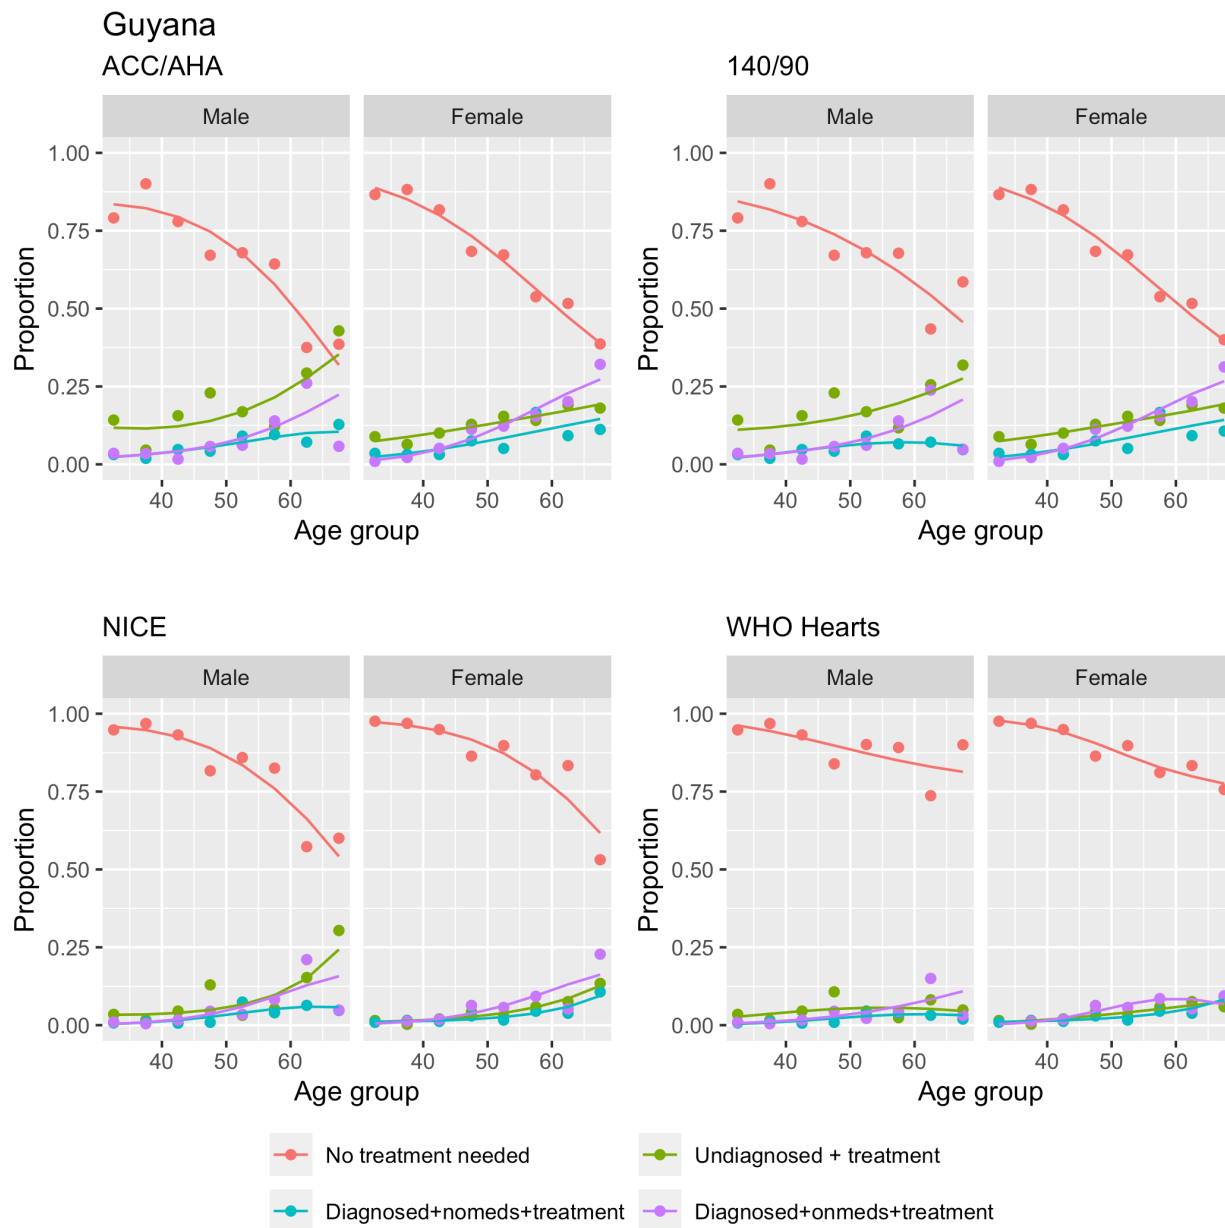

**Supplemental Figure XXIII:** Regression model fit of treatment need by age for Guyana. Lines are the model predicted proportions and the dots are the raw proportions by 5-year age group.



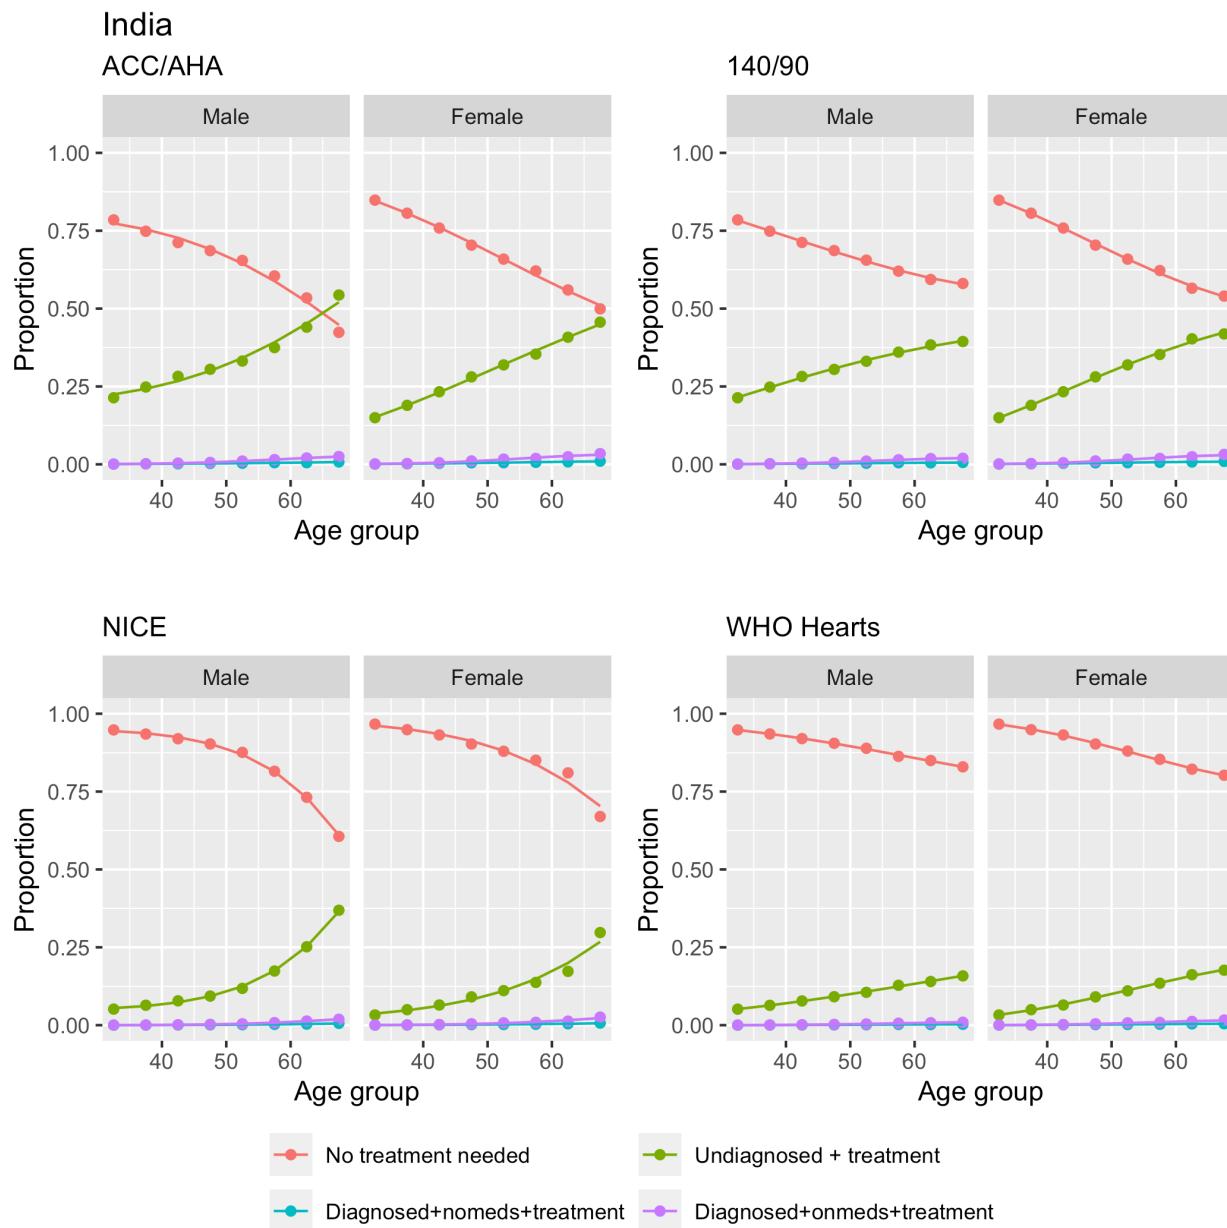

**Supplemental Figure XXIV:** Regression model fit of treatment need by age for India. Lines are the model predicted proportions and the dots are the raw proportions by 5-year age group.

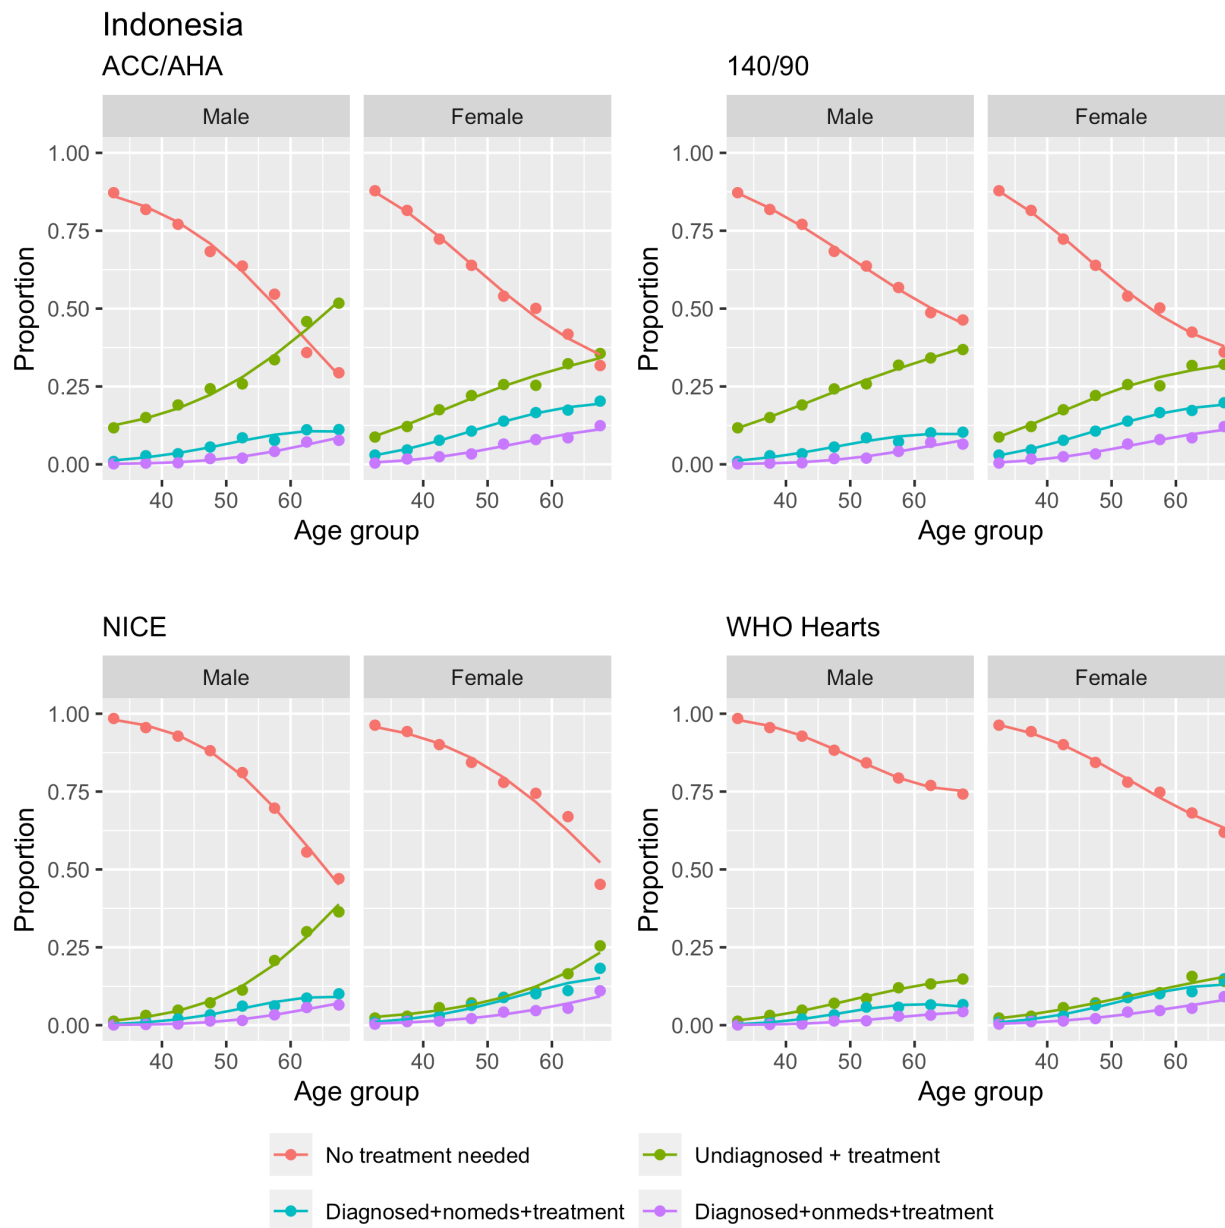

**Supplemental Figure XXV:** Regression model fit of treatment need by age for Indonesia. Lines are the model predicted proportions and the dots are the raw proportions by 5-year age group.

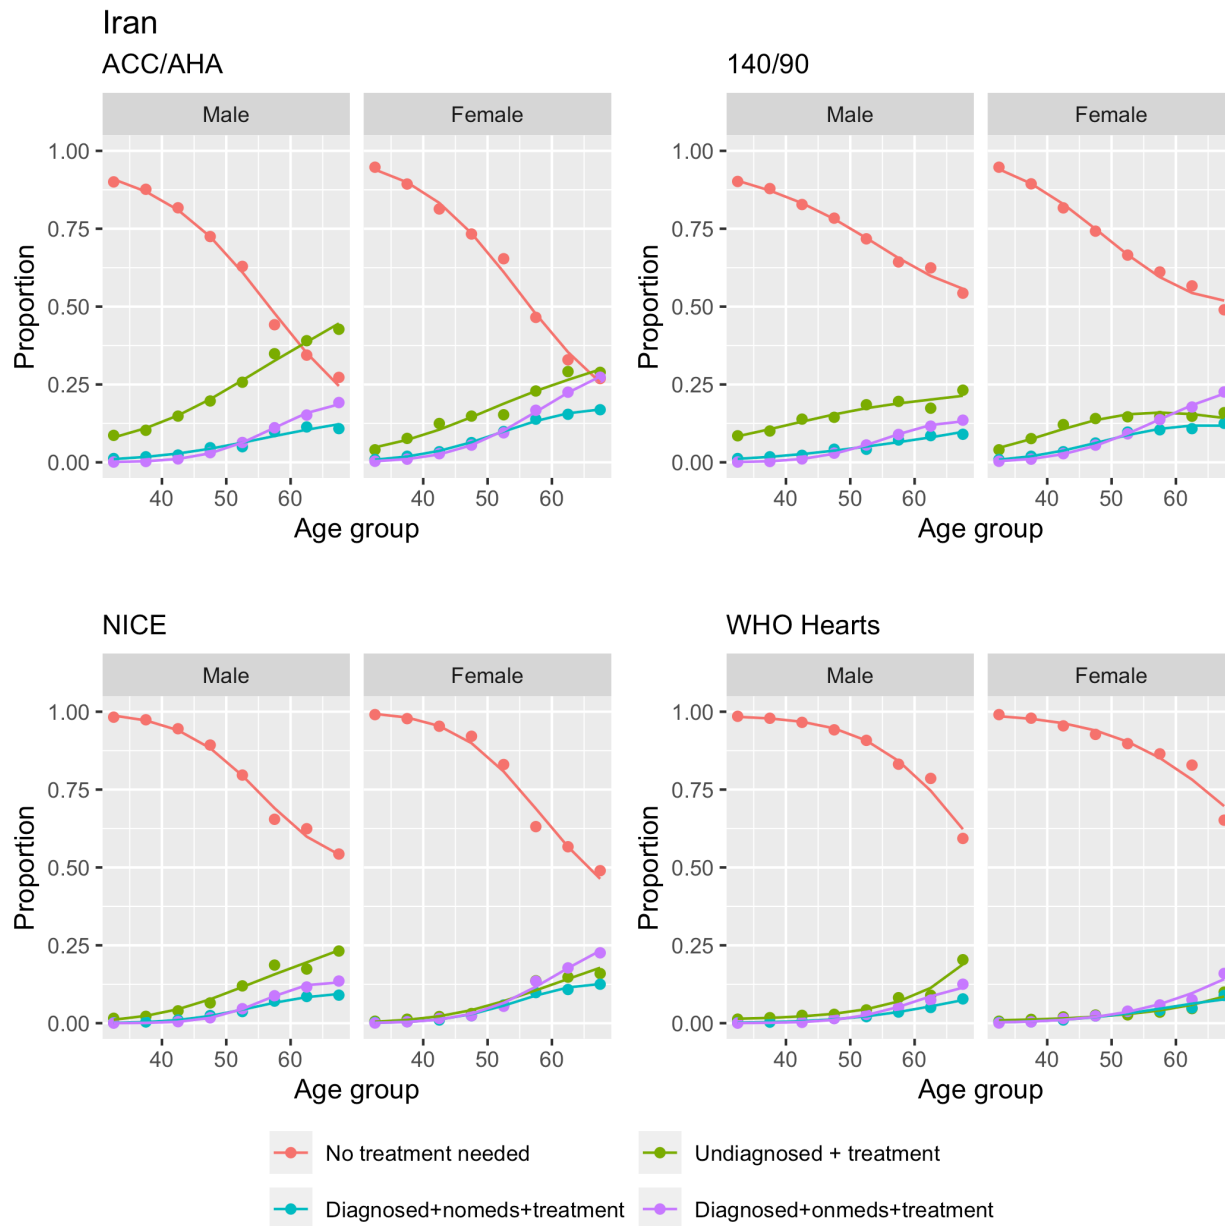

**Supplemental Figure XXVI:** Regression model fit of treatment need by age for Iran. Lines are the model predicted proportions and the dots are the raw proportions by 5-year age group.

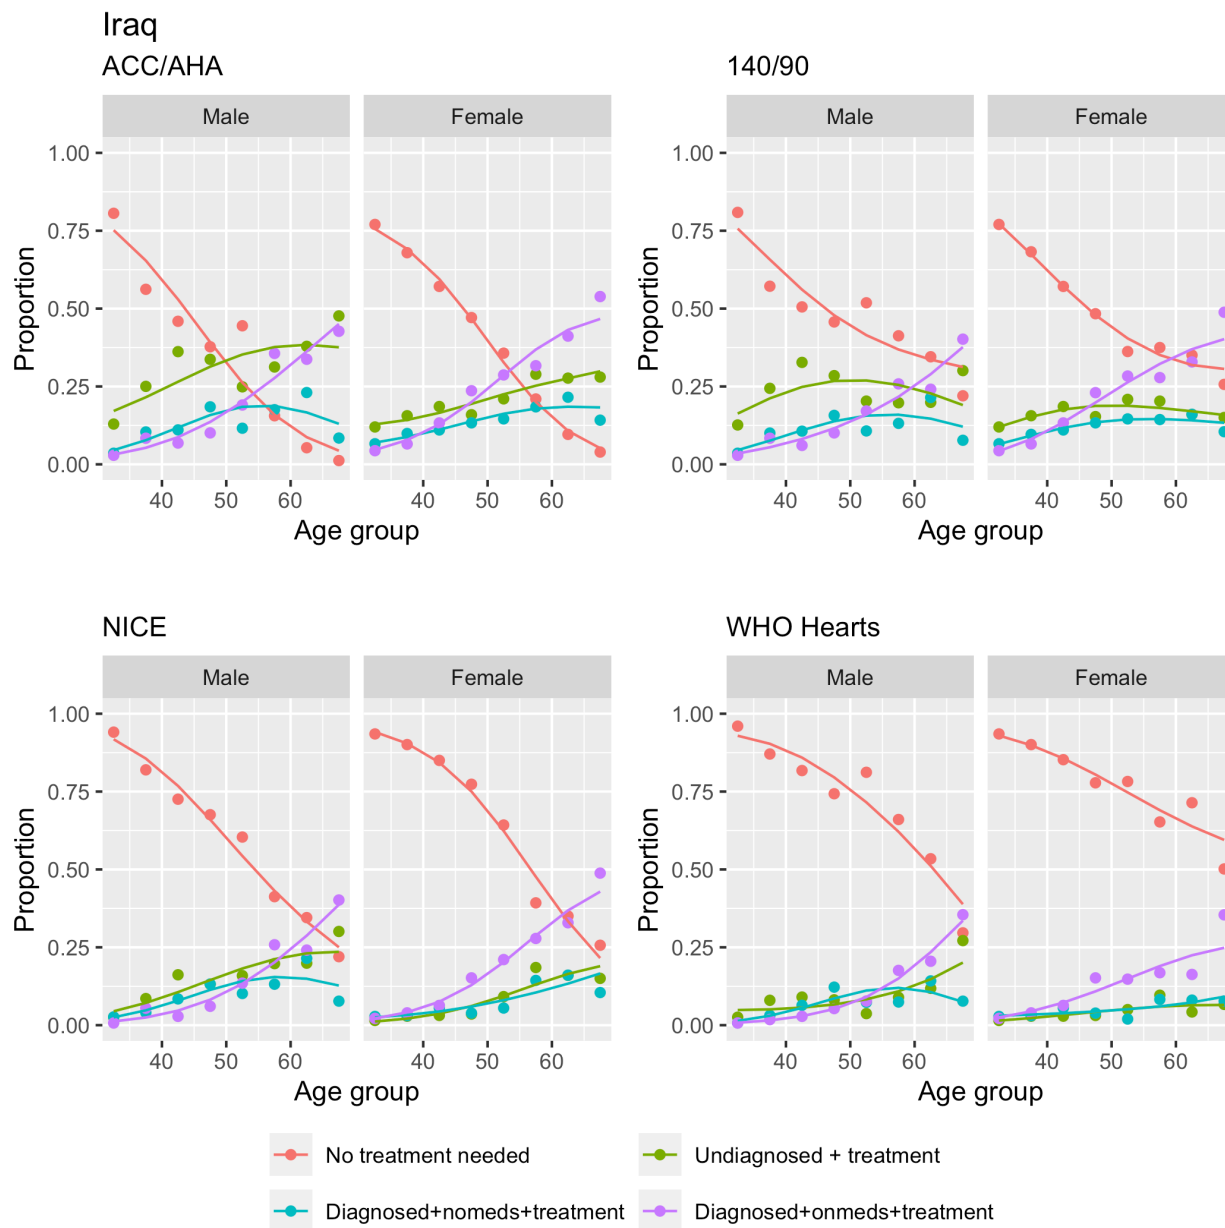

**Supplemental Figure XXVII:** Regression model fit of treatment need by age for Iraq. Lines are the model predicted proportions and the dots are the raw proportions by 5-year age group.



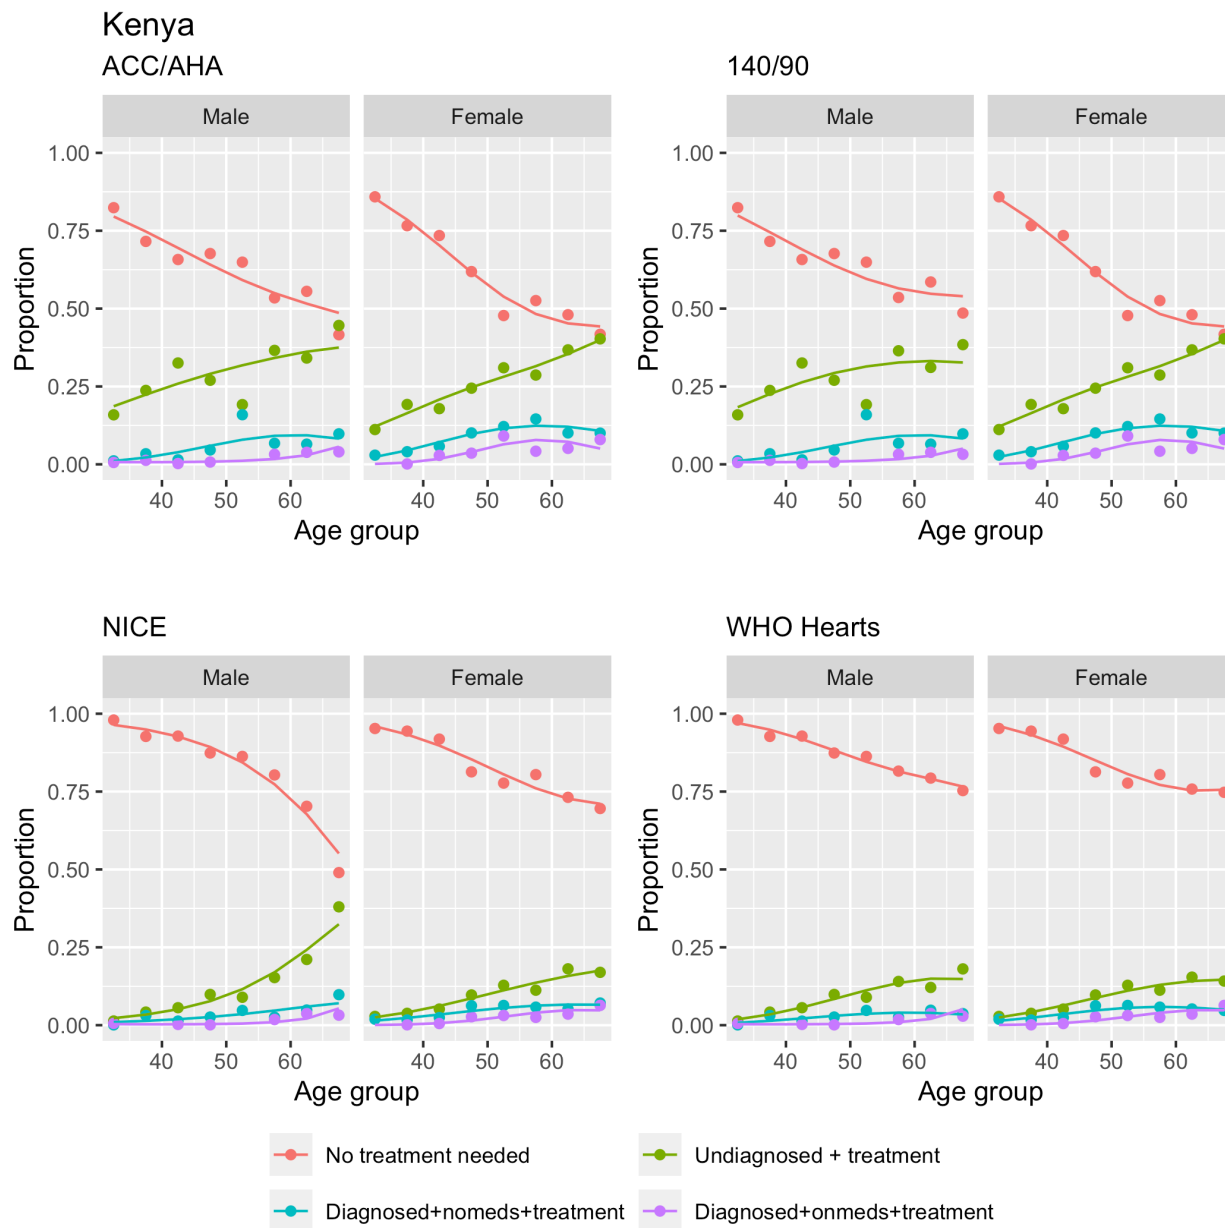

**Supplemental Figure XXIX:** Regression model fit of treatment need by age for Kenya. Lines are the model predicted proportions and the dots are the raw proportions by 5-year age group.



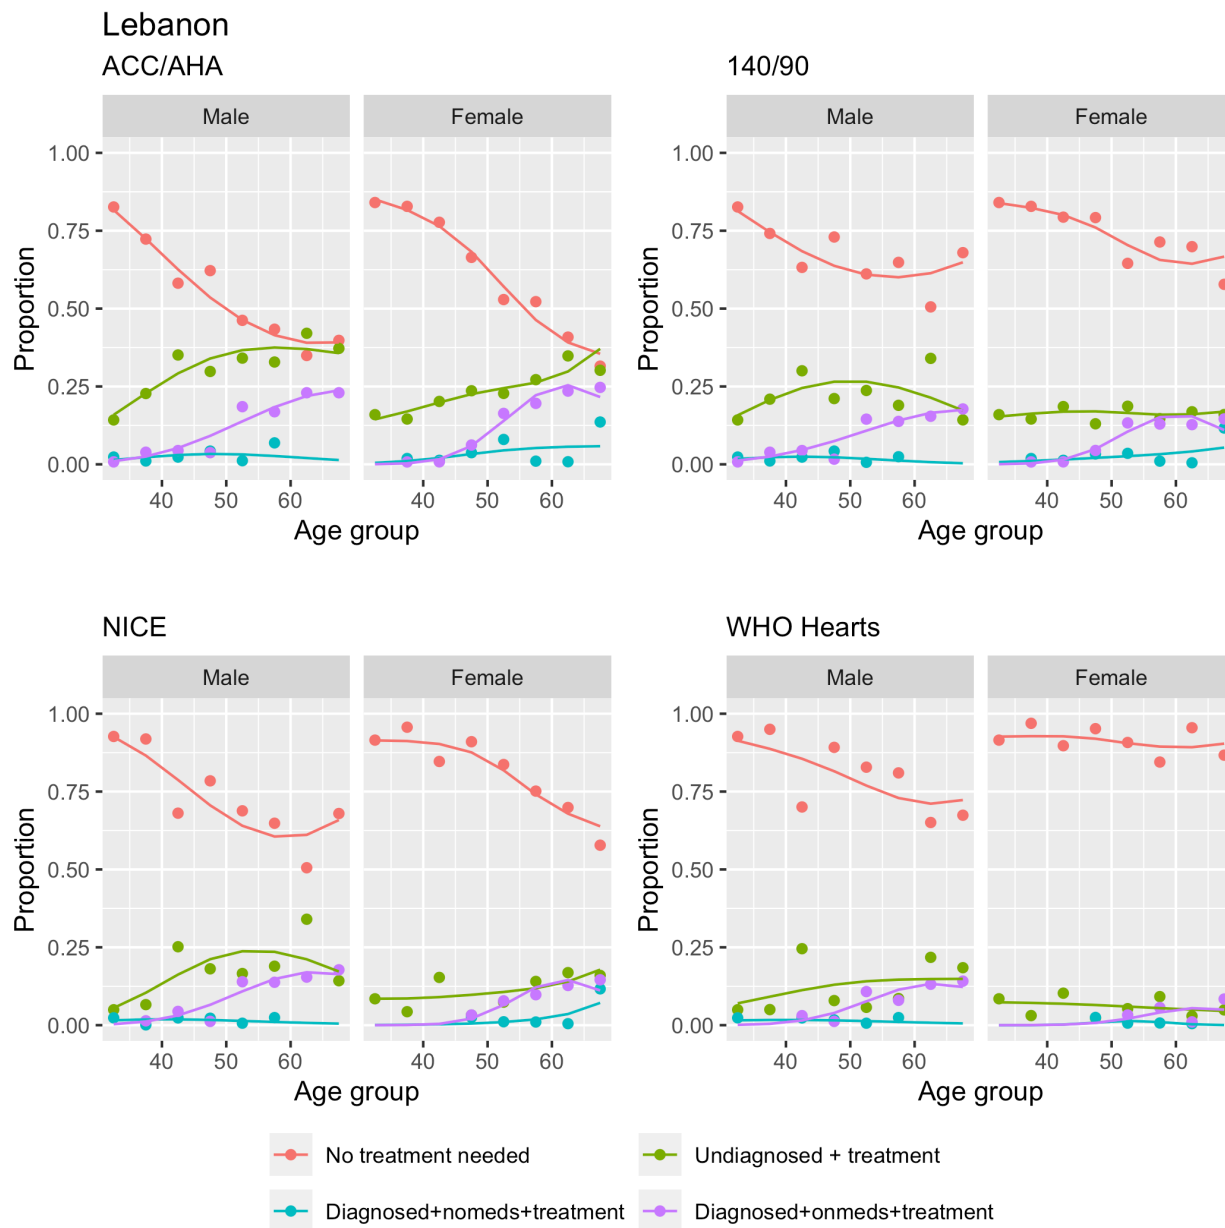

**Supplemental Figure XXXI:** Regression model fit of treatment need by age for Lebanon. Lines are the model predicted proportions and the dots are the raw proportions by 5-year age group.



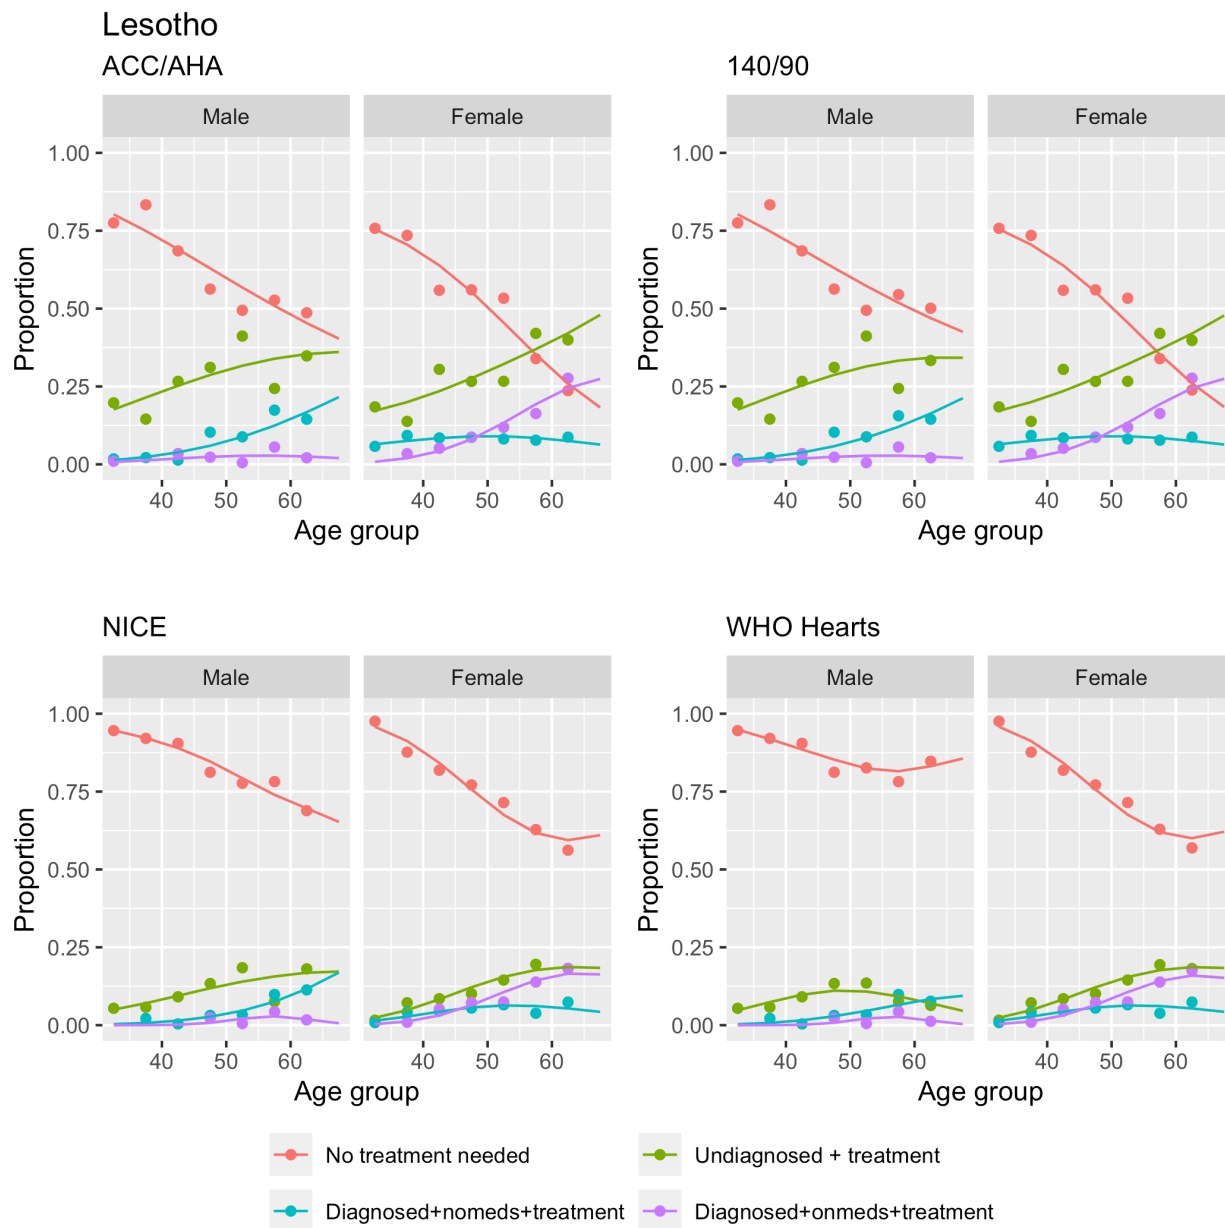

**Supplemental Figure XXXII:** Regression model fit of treatment need by age for Lesotho. Lines are the model predicted proportions and the dots are the raw proportions by 5-year age group.

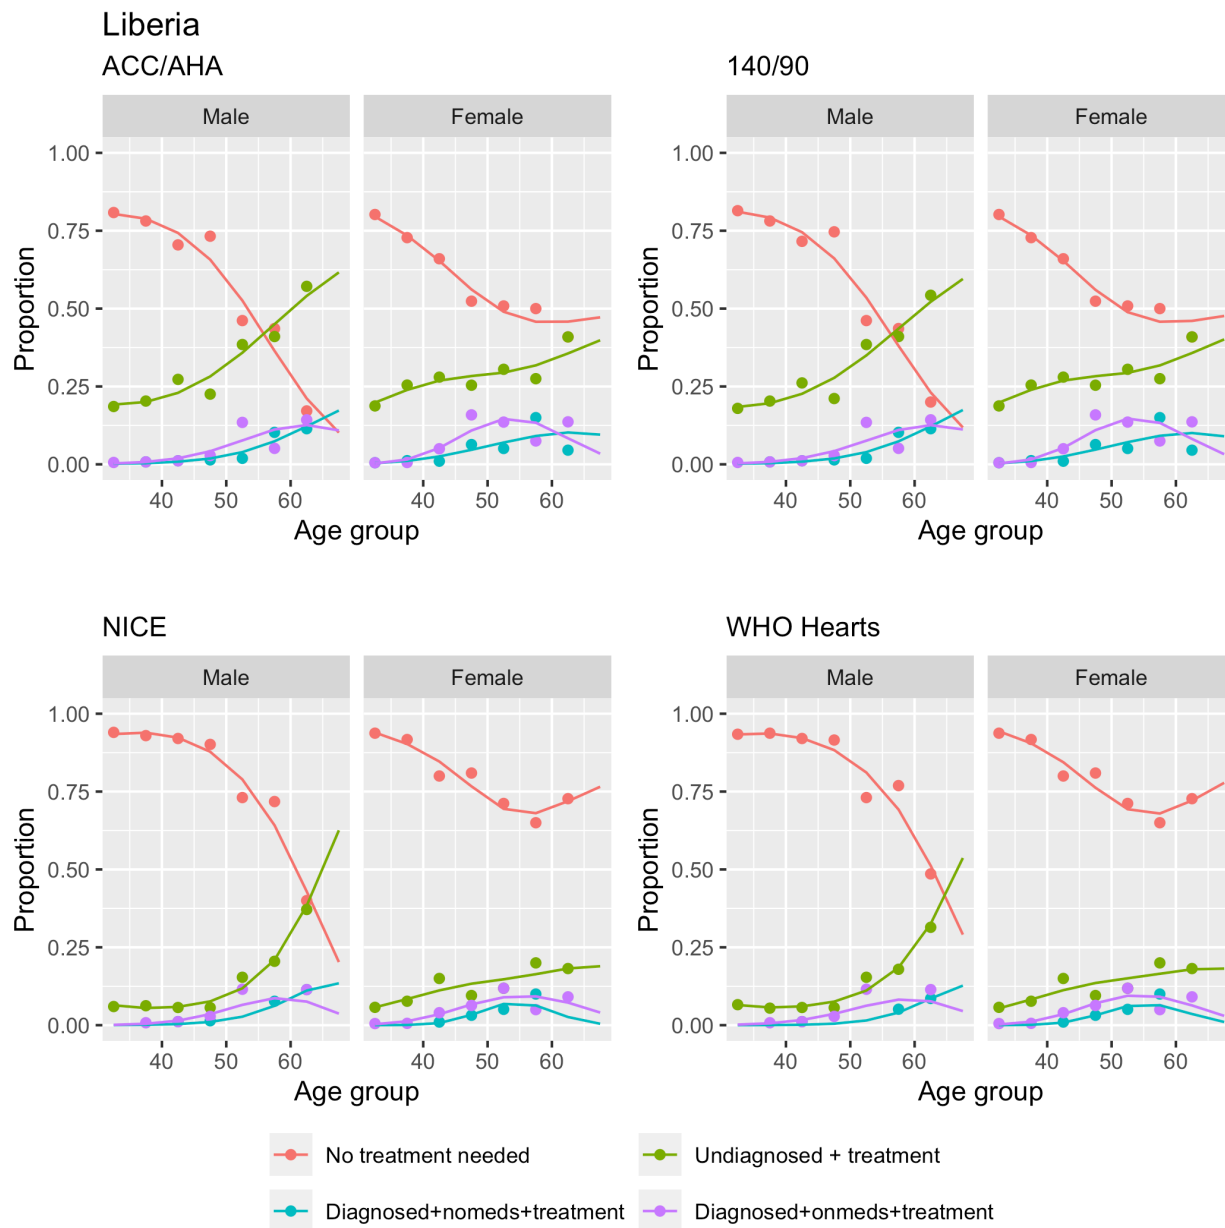

**Supplemental Figure XXXIII:** Regression model fit of treatment need by age for Liberia. Lines are the model predicted proportions and the dots are the raw proportions by 5-year age group.

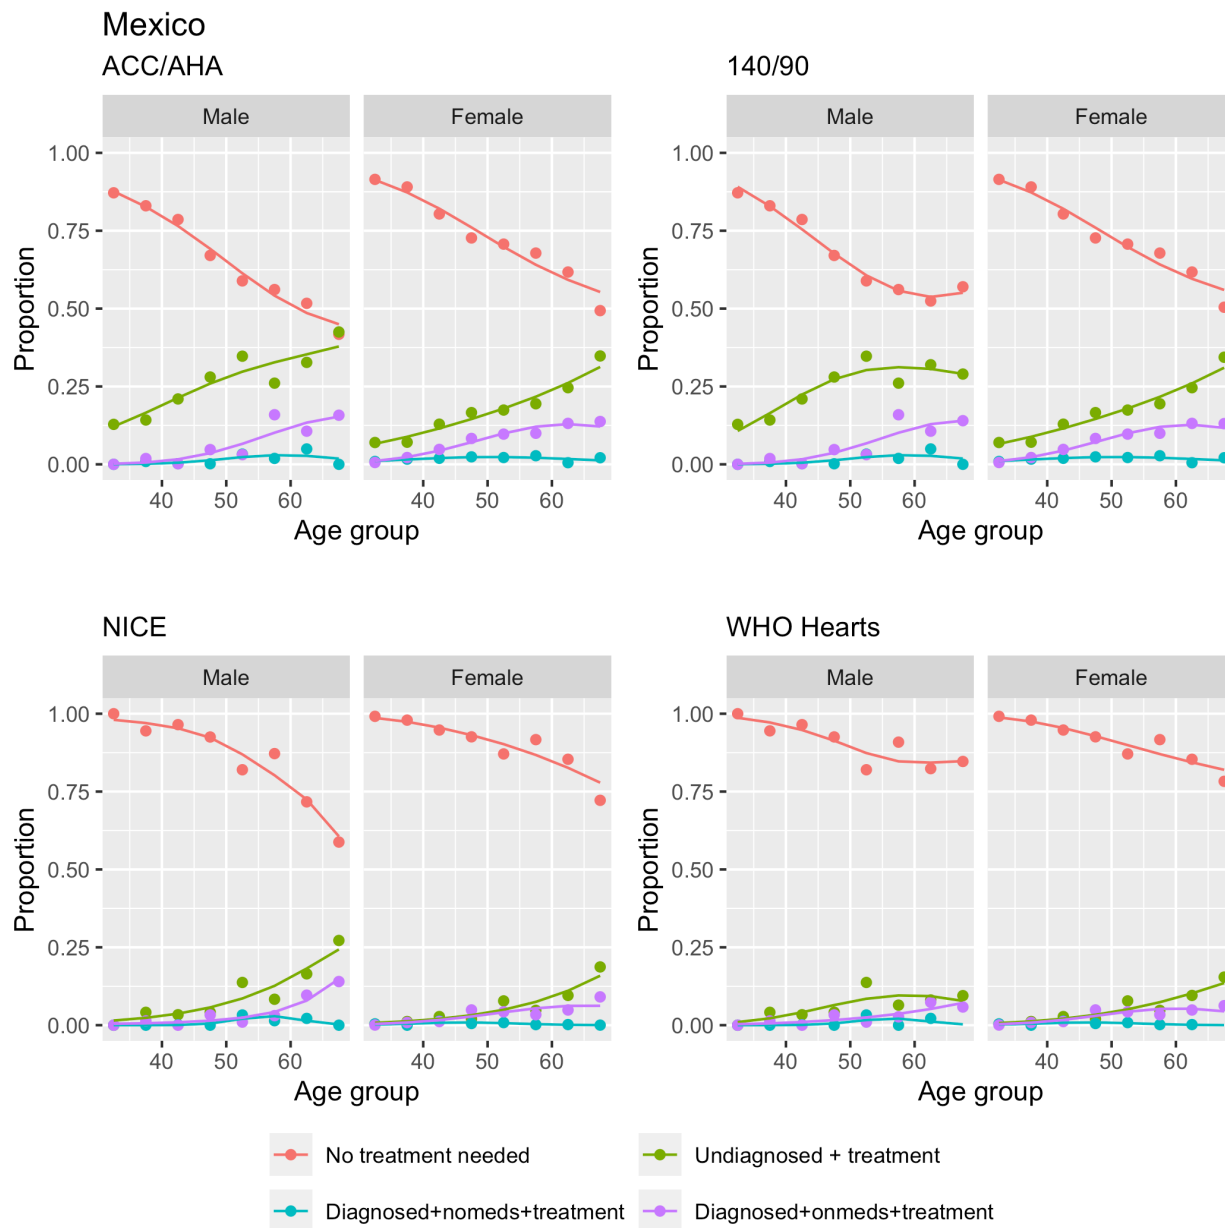

**Supplemental Figure XXXIV:** Regression model fit of treatment need by age for Mexico. Lines are the model predicted proportions and the dots are the raw proportions by 5-year age group.

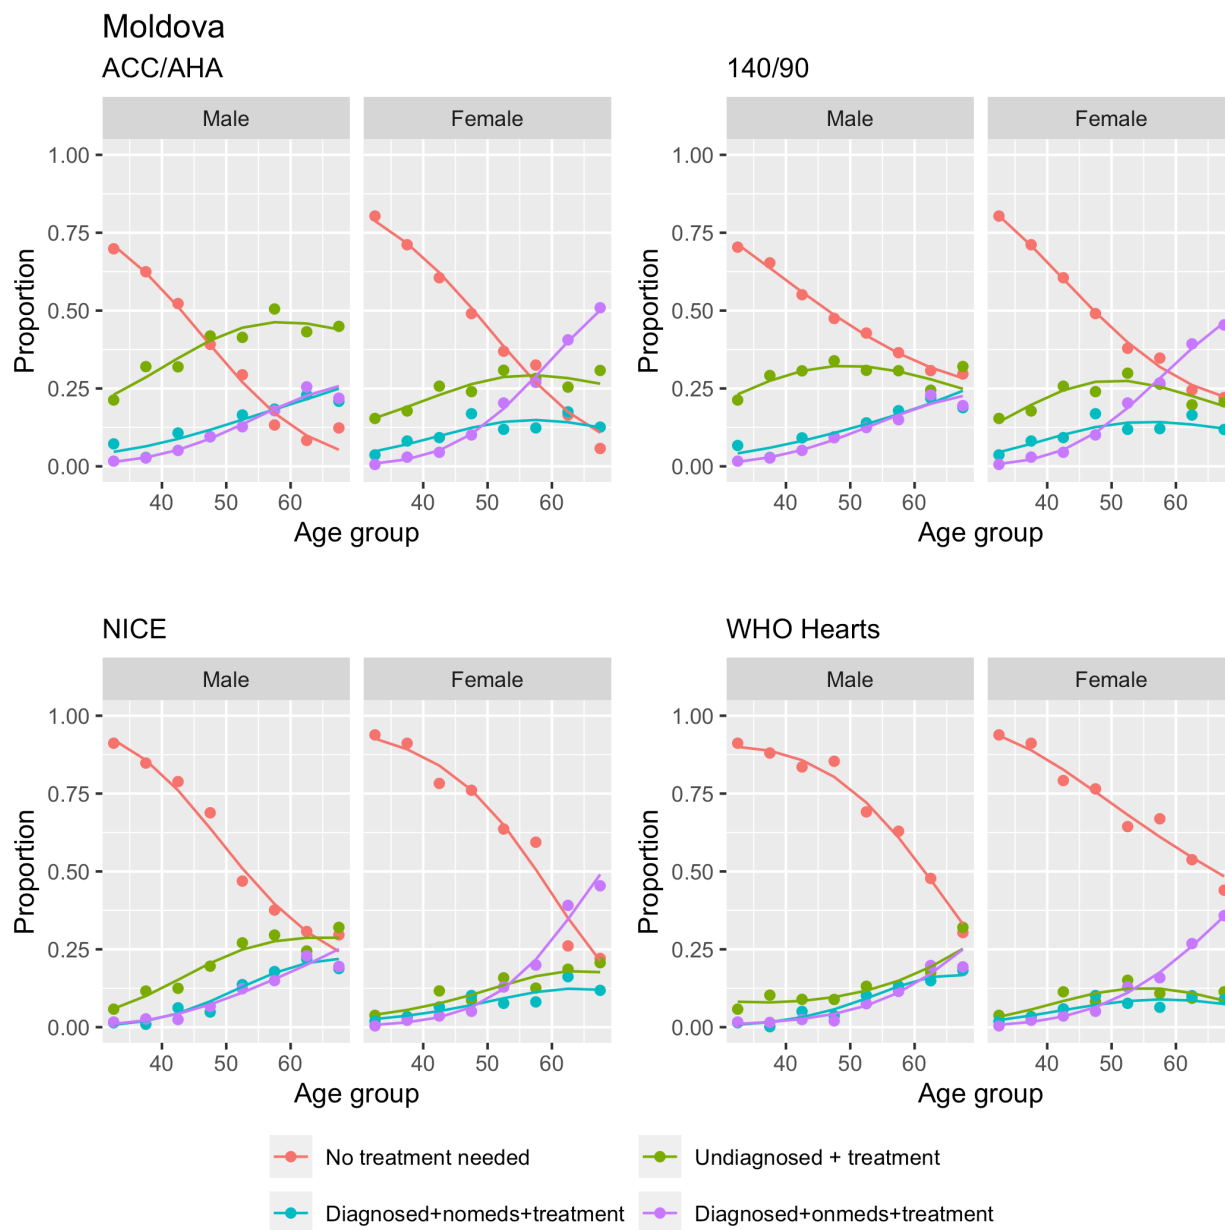

**Supplemental Figure XXXV:** Regression model fit of treatment need by age for Moldova. Lines are the model predicted proportions and the dots are the raw proportions by 5-year age group.

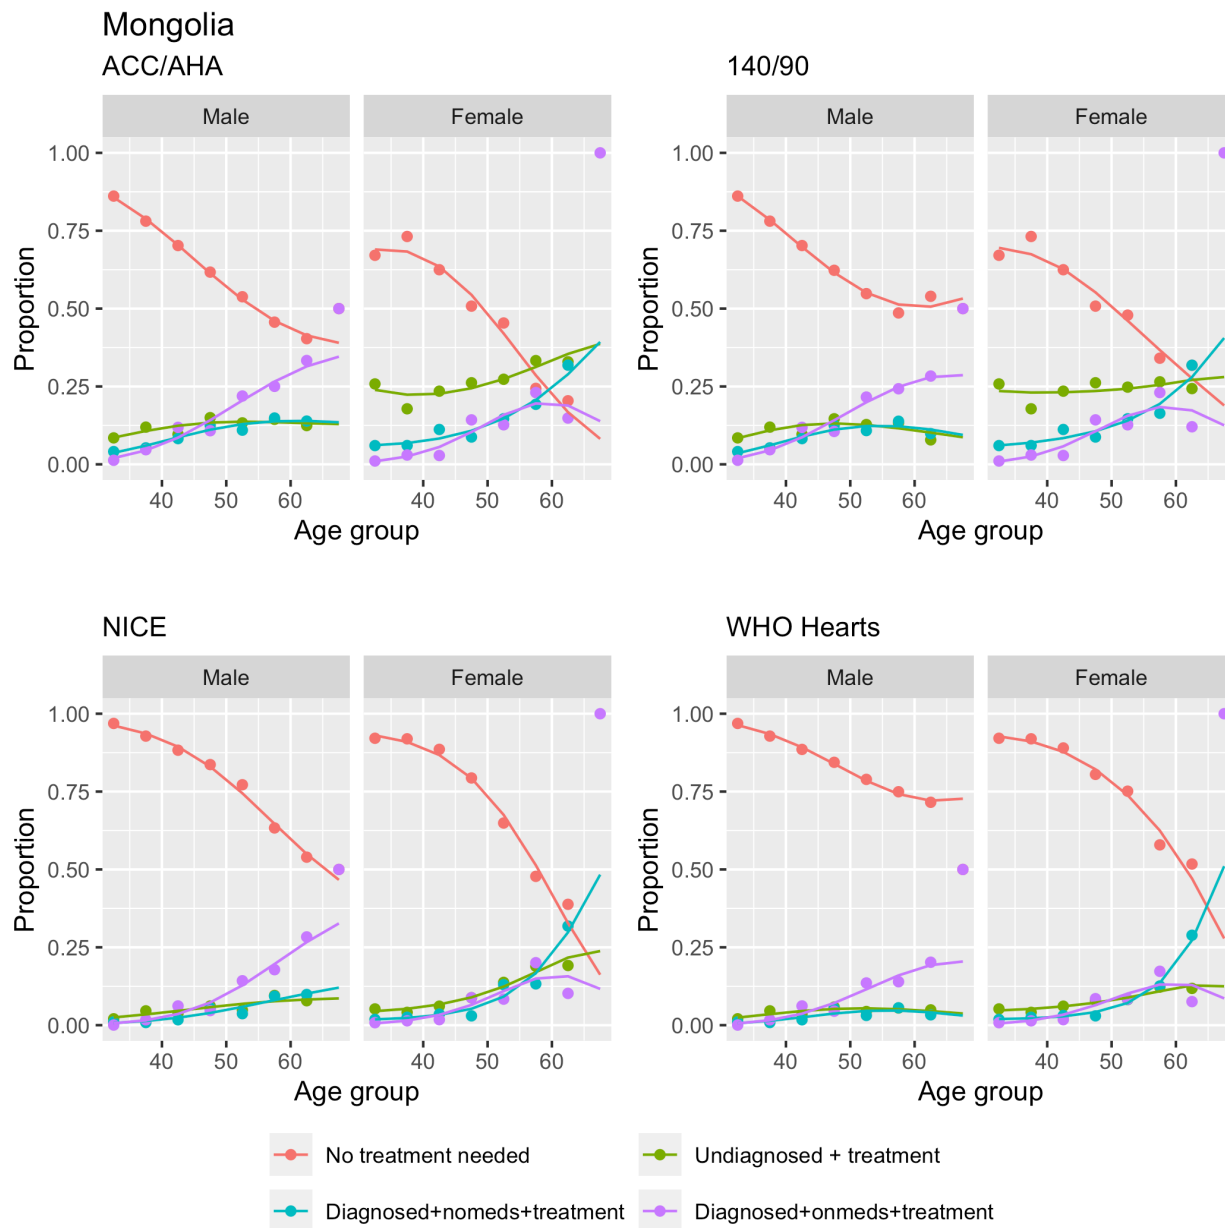

**Supplemental Figure XXXVI:** Regression model fit of treatment need by age for Mongolia. Lines are the model predicted proportions and the dots are the raw proportions by 5-year age group.

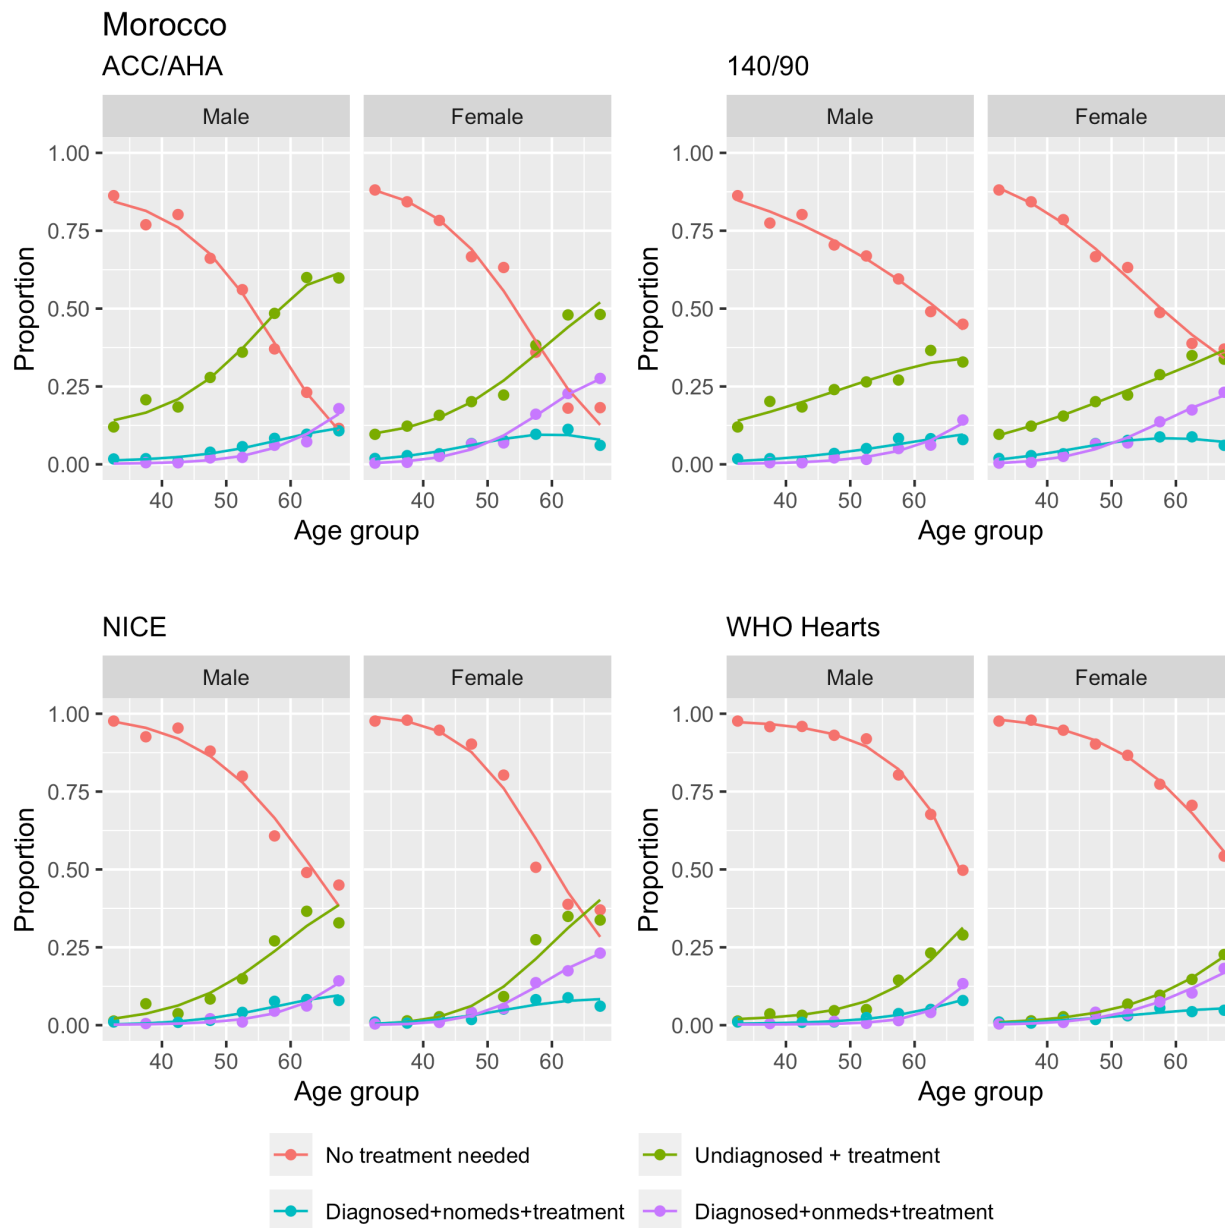

**Supplemental Figure XXXVII:** Regression model fit of treatment need by age for Morocco. Lines are the model predicted proportions and the dots are the raw proportions by 5-year age group.

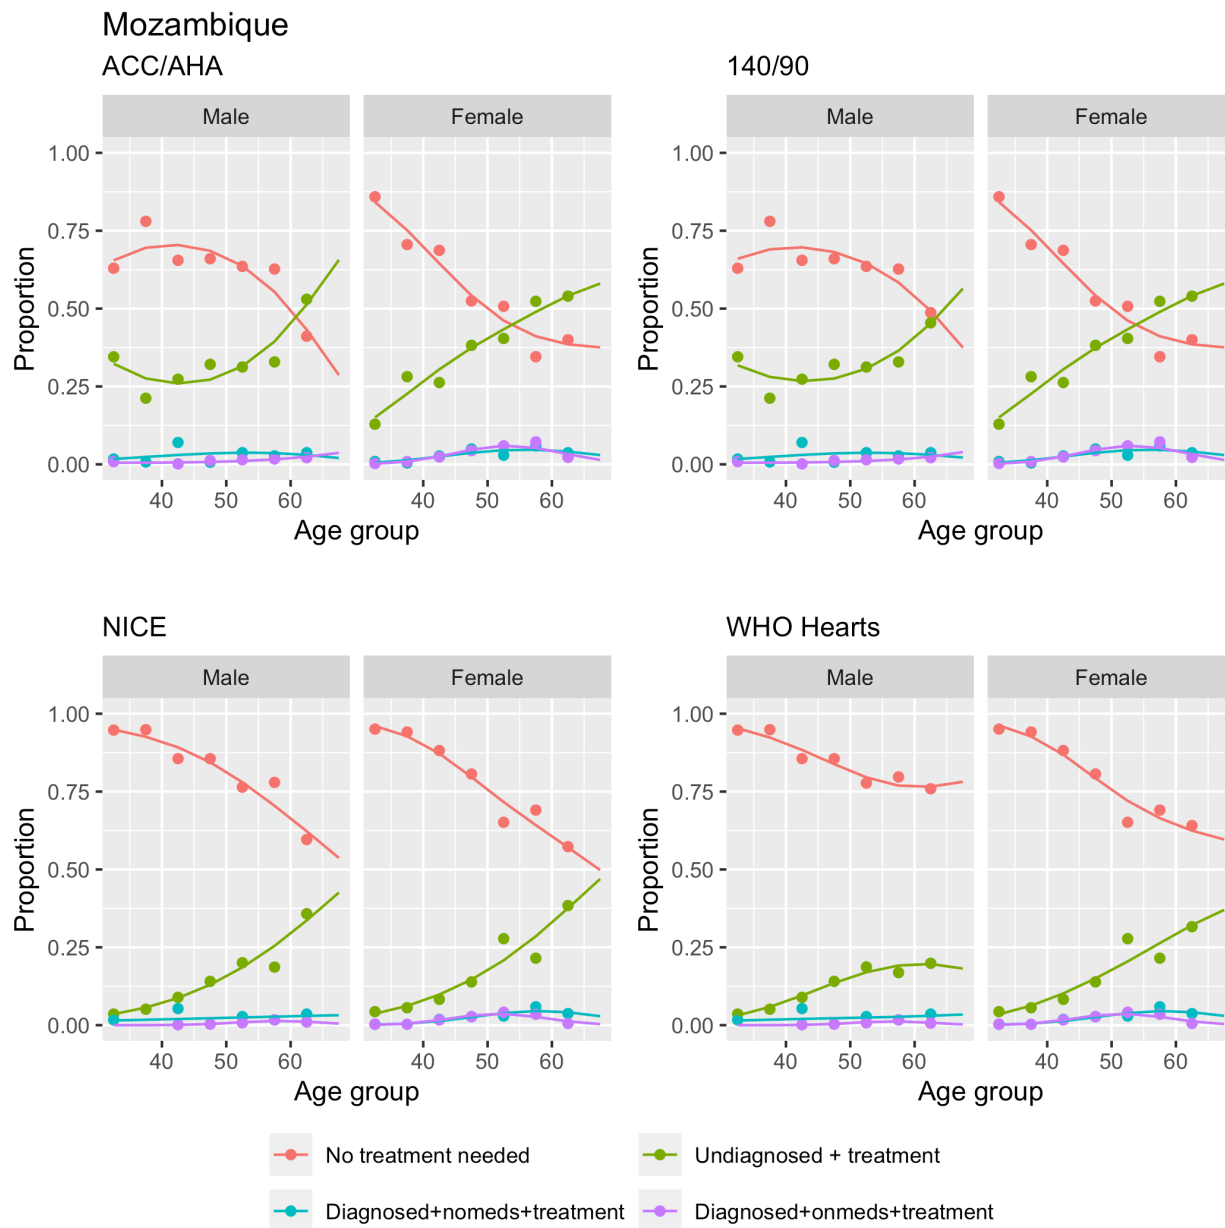

**Supplemental Figure XXXVIII:** Regression model fit of treatment need by age for Mozambique. Lines are the model predicted proportions and the dots are the raw proportions by 5-year age group.





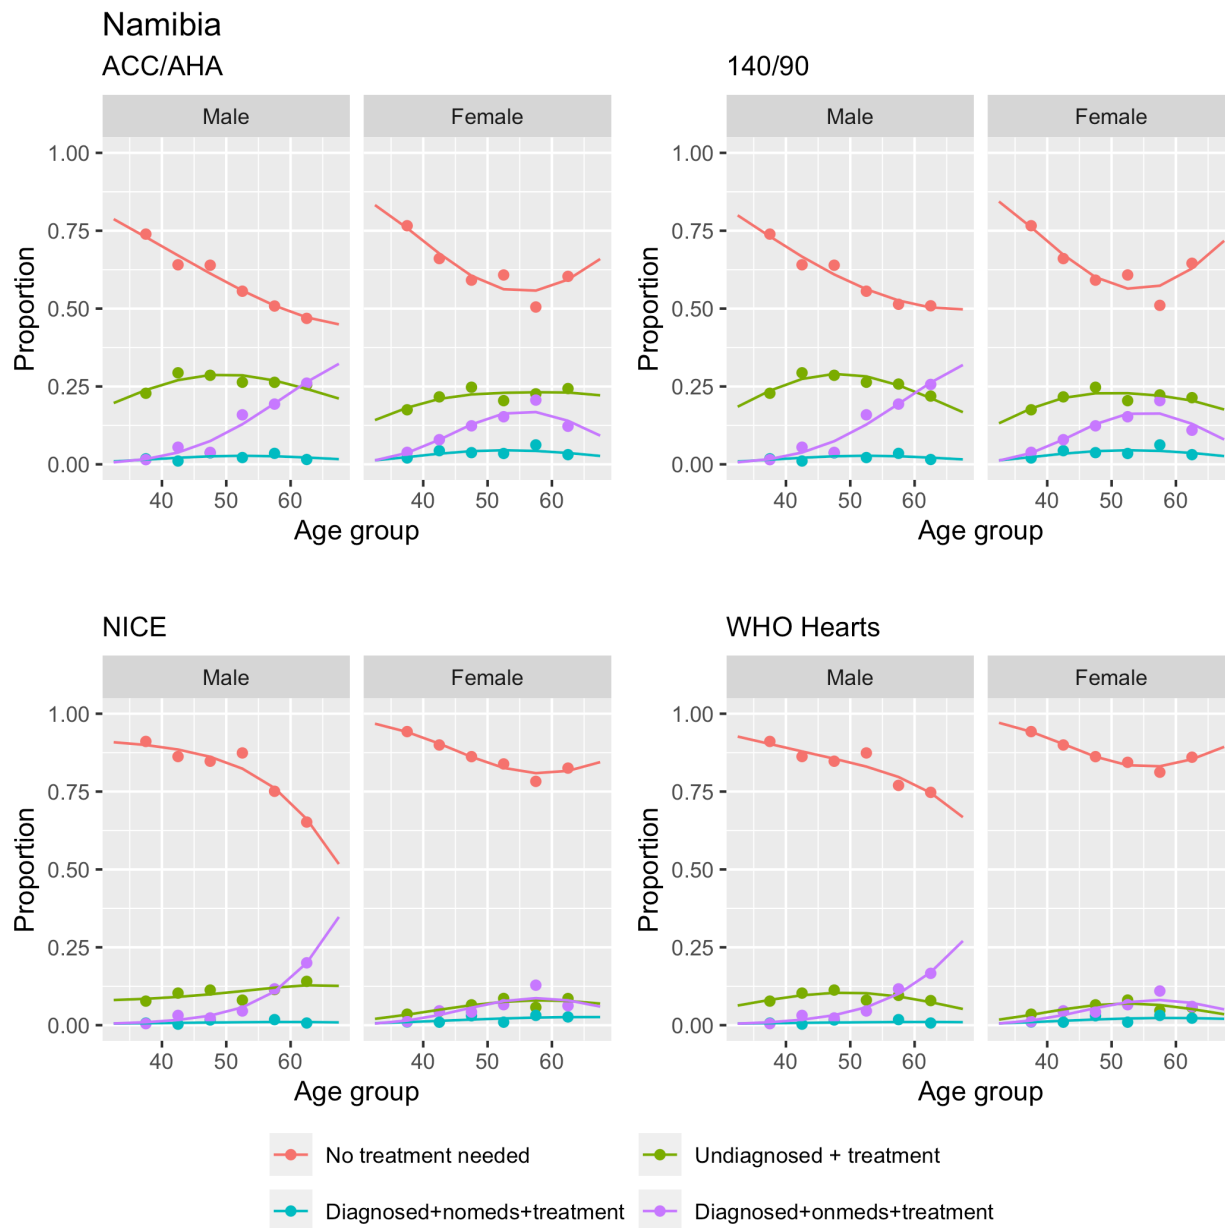

**Supplemental Figure XL:** Regression model fit of treatment need by age for Namibia. Lines are the model predicted proportions and the dots are the raw proportions by 5-year age group.

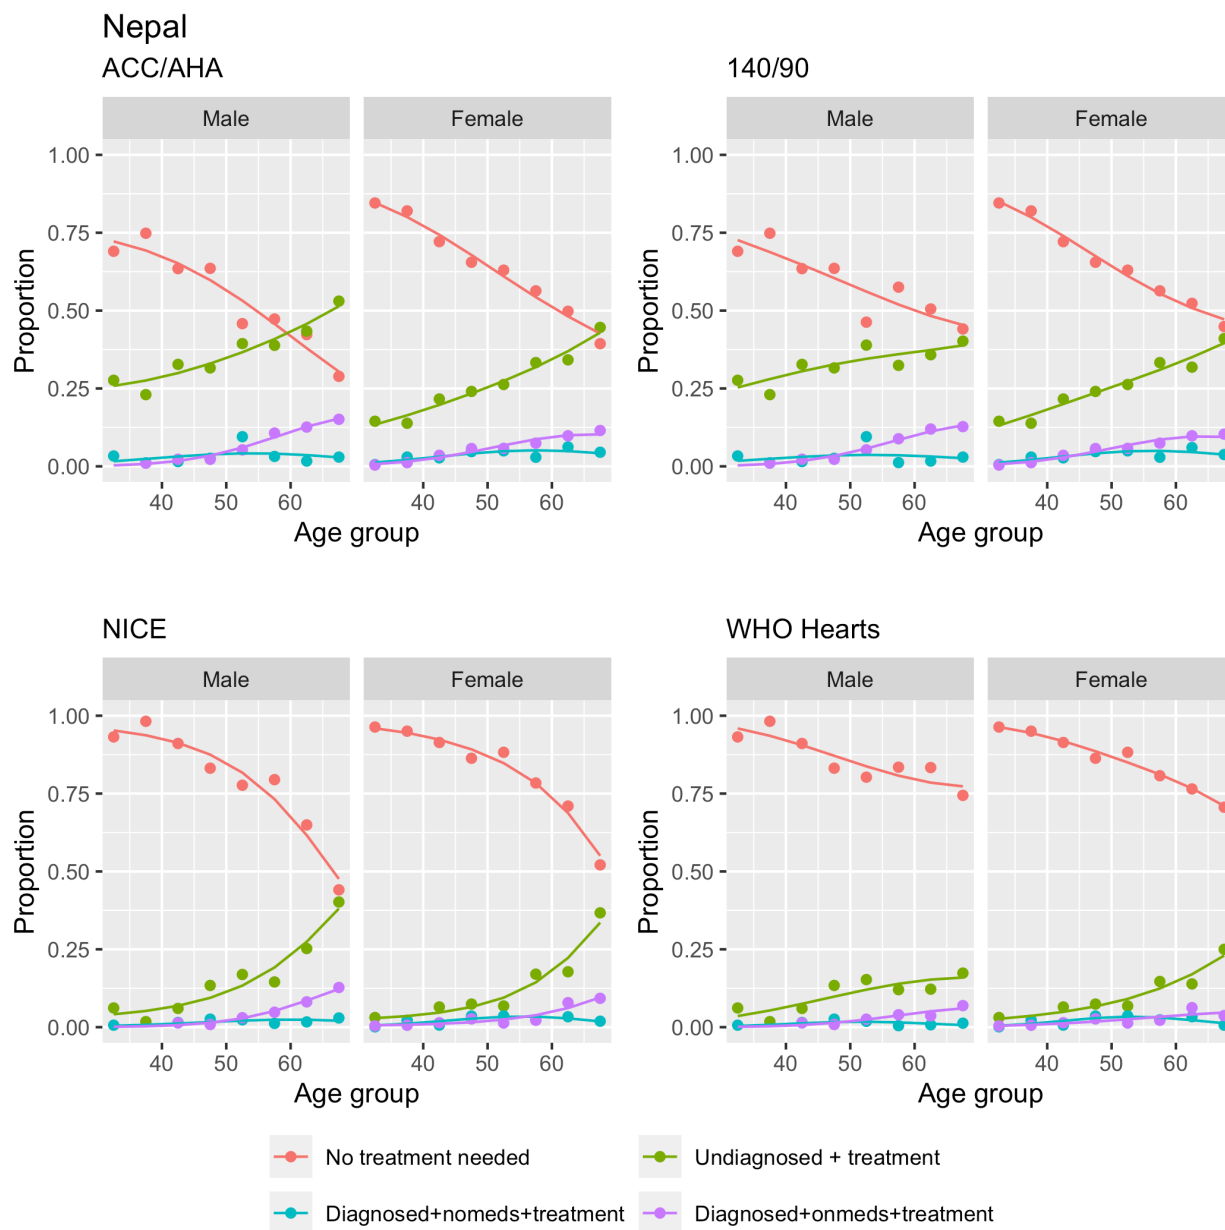

**Supplemental Figure XLI:** Regression model fit of treatment need by age for Nepal. Lines are the model predicted proportions and the dots are the raw proportions by 5-year age group.



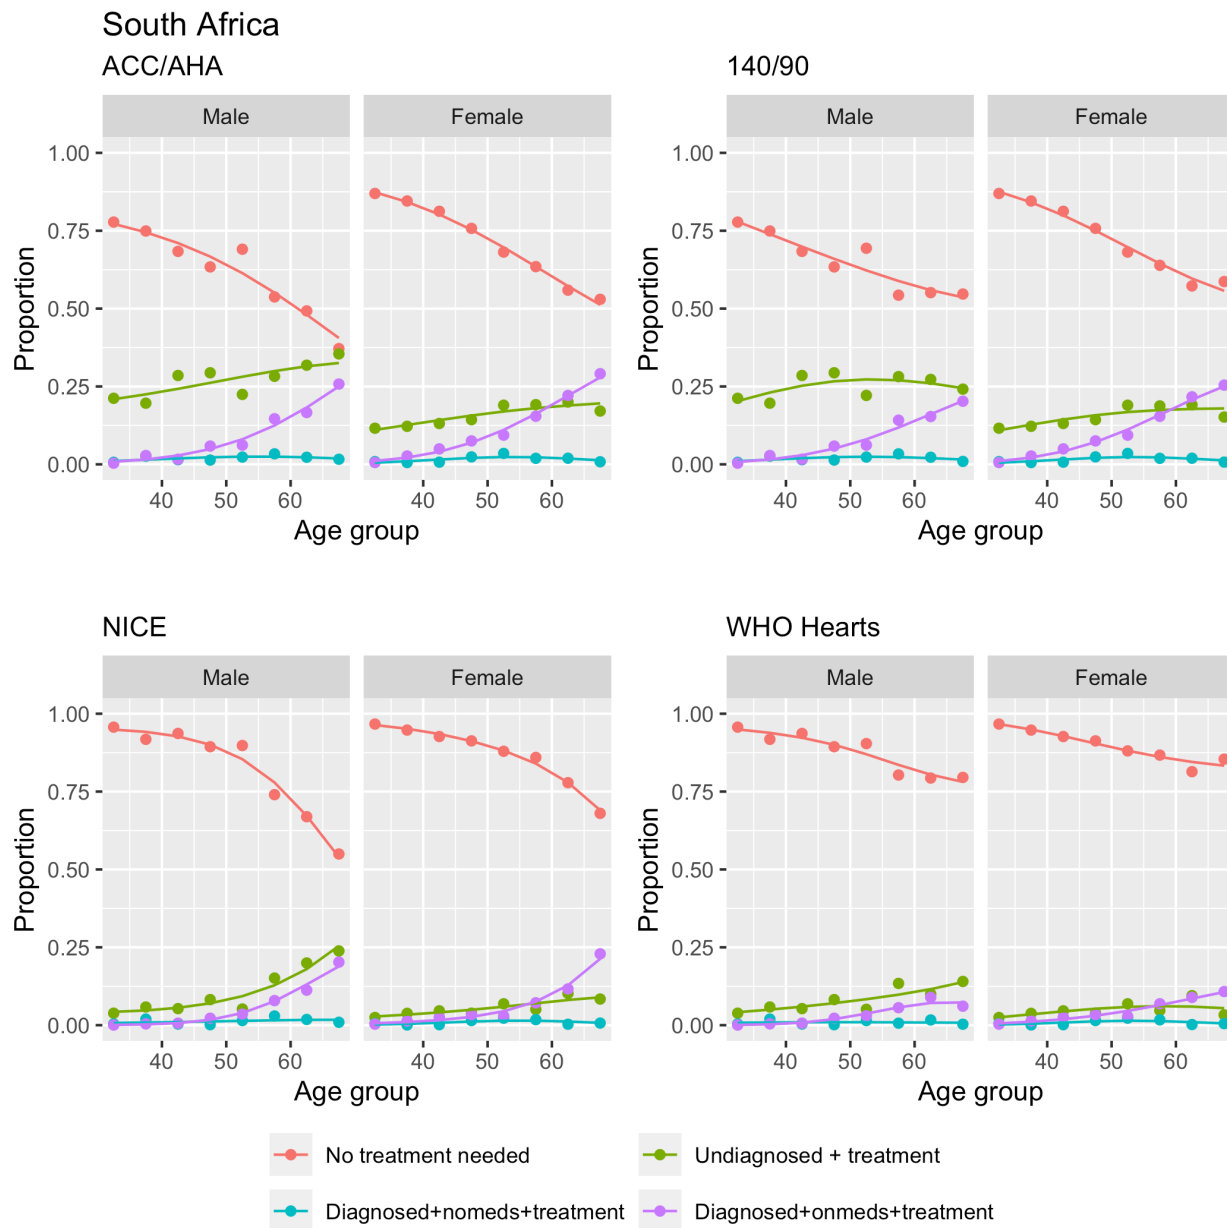

**Supplemental Figure XLIII:** Regression model fit of treatment need by age for South Africa. Lines are the model predicted proportions and the dots are the raw proportions by 5-year age group.

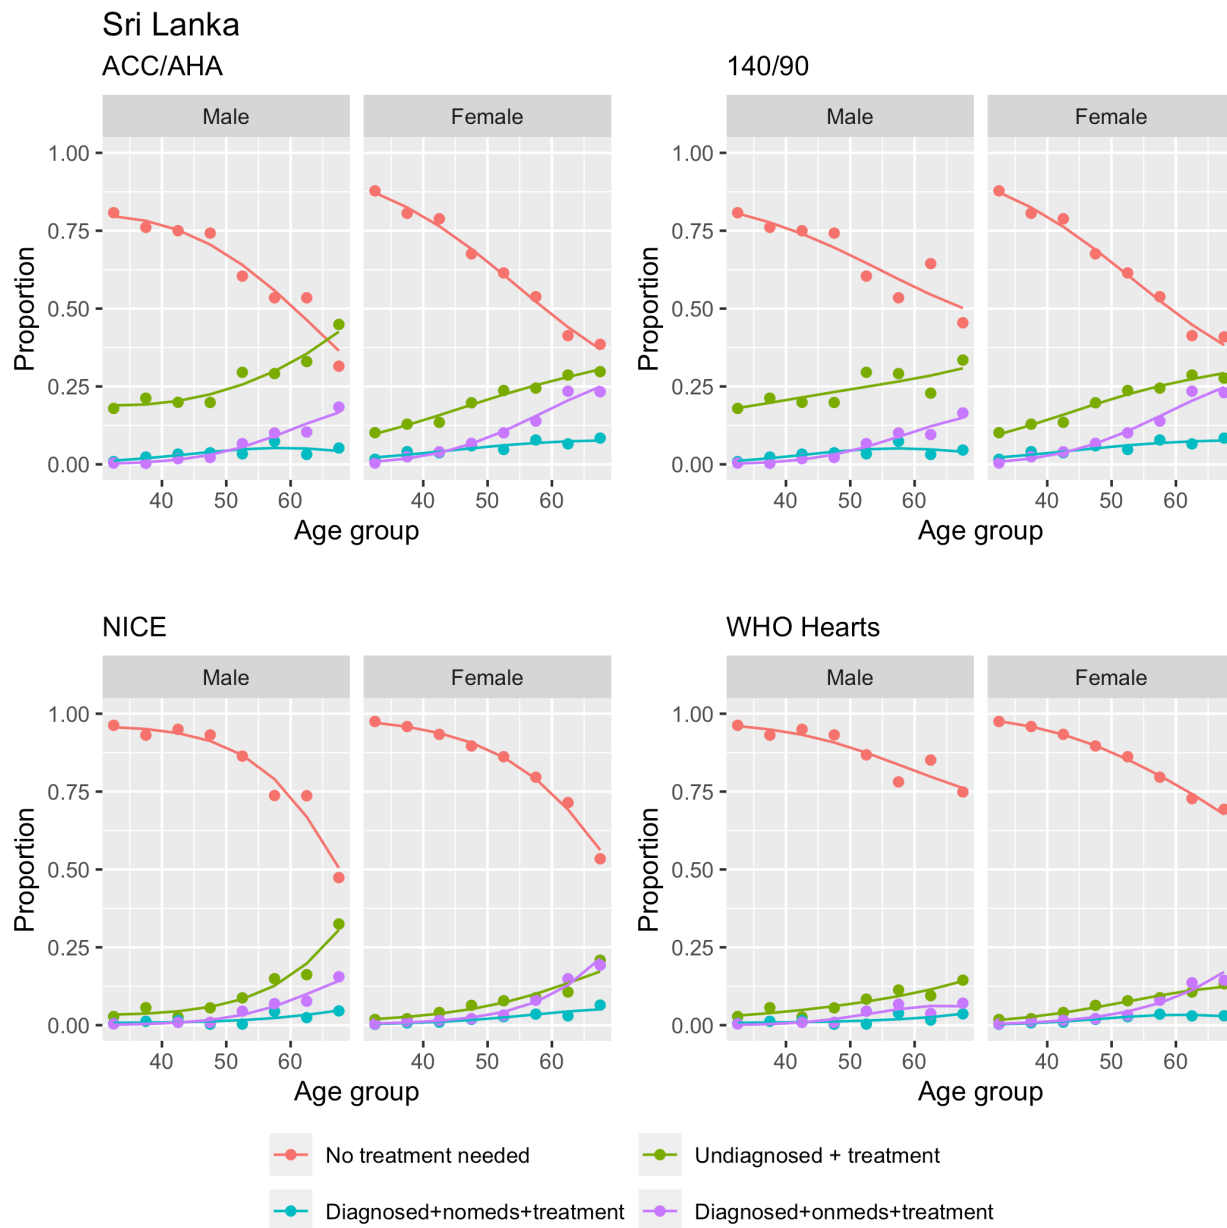

**Supplemental Figure XLIV:** Regression model fit of treatment need by age for Sri Lanka. Lines are the model predicted proportions and the dots are the raw proportions by 5-year age group.

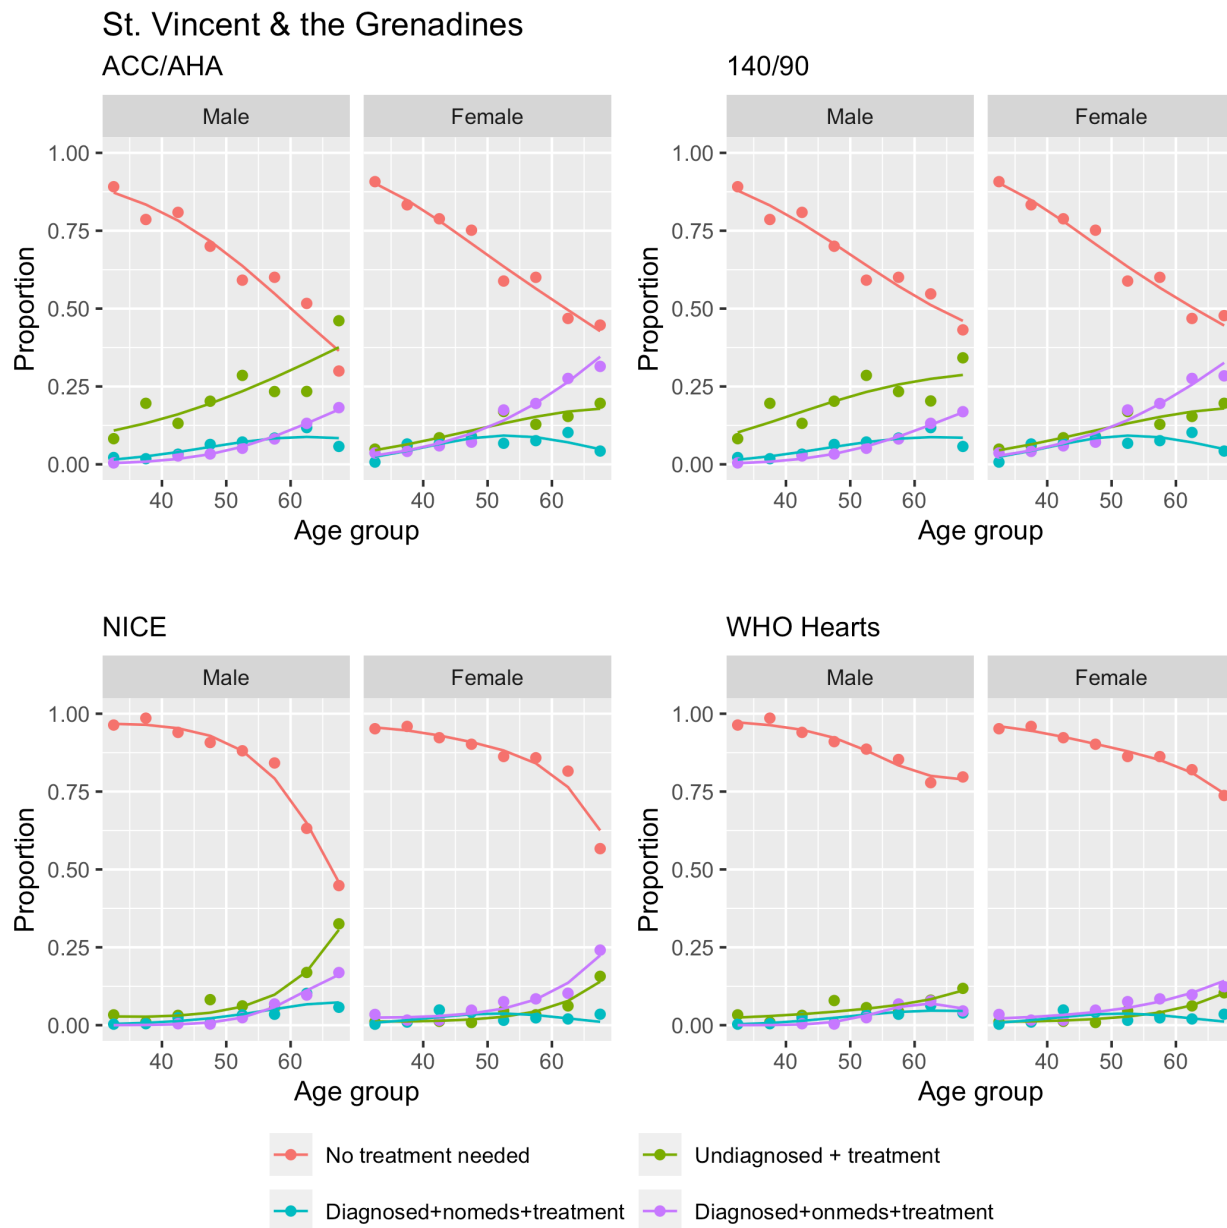

**Supplemental Figure XLV:** Regression model fit of treatment need by age for St. Vincent and the Grenadines. Lines are the model predicted proportions and the dots are the raw proportions by 5-year age group.

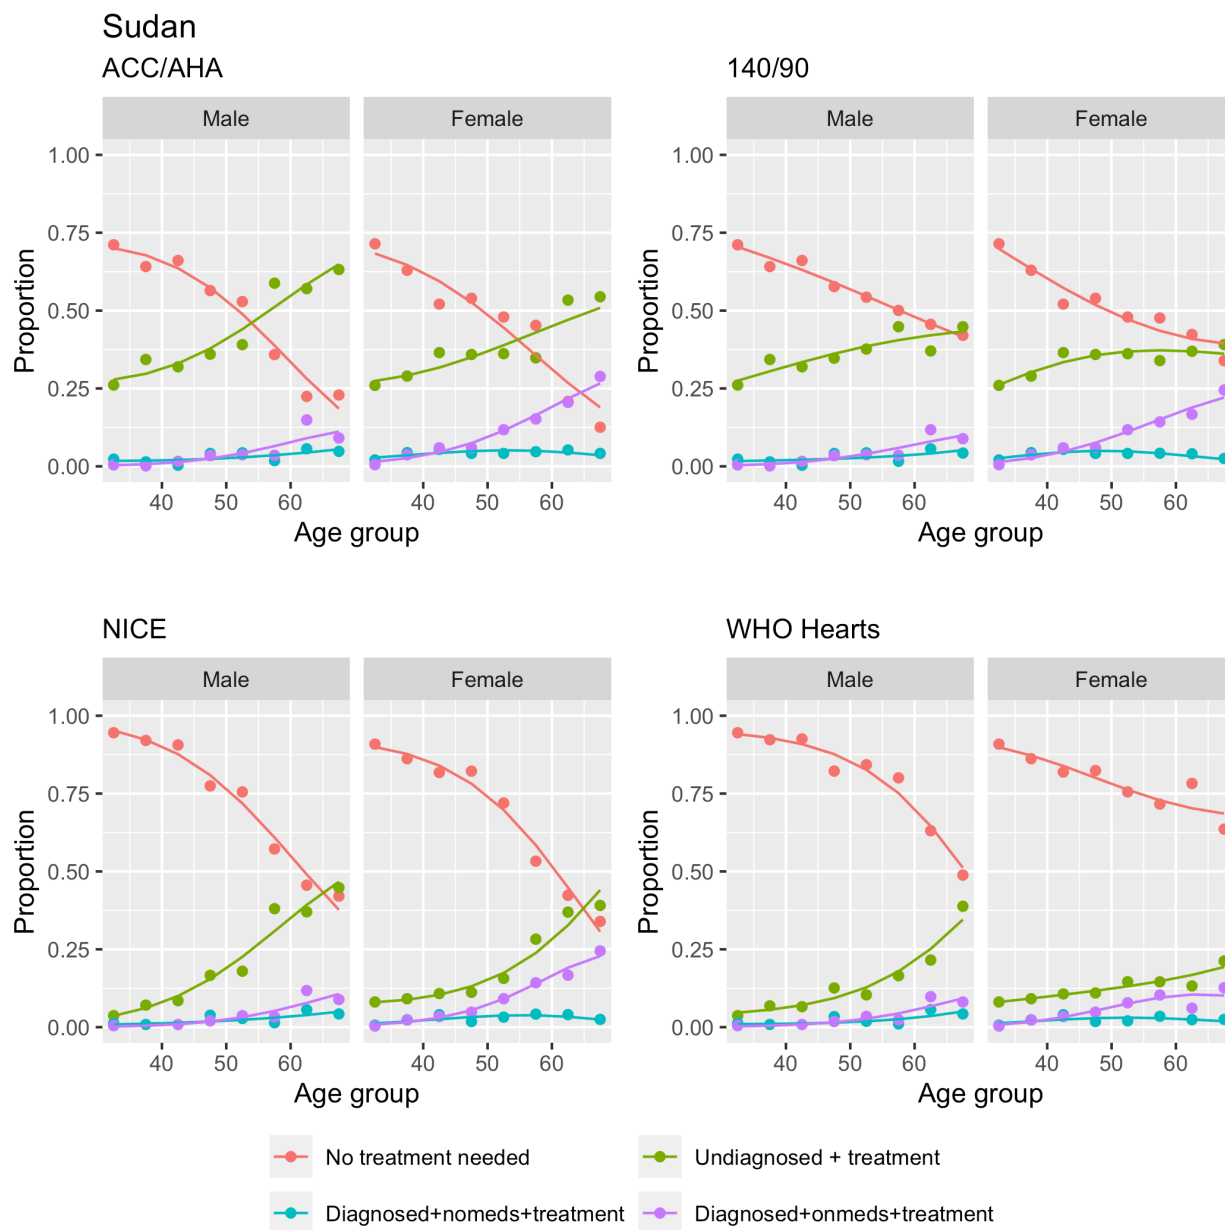

**Supplemental Figure XLVI:** Regression model fit of treatment need by age for Sudan. Lines are the model predicted proportions and the dots are the raw proportions by 5-year age group.







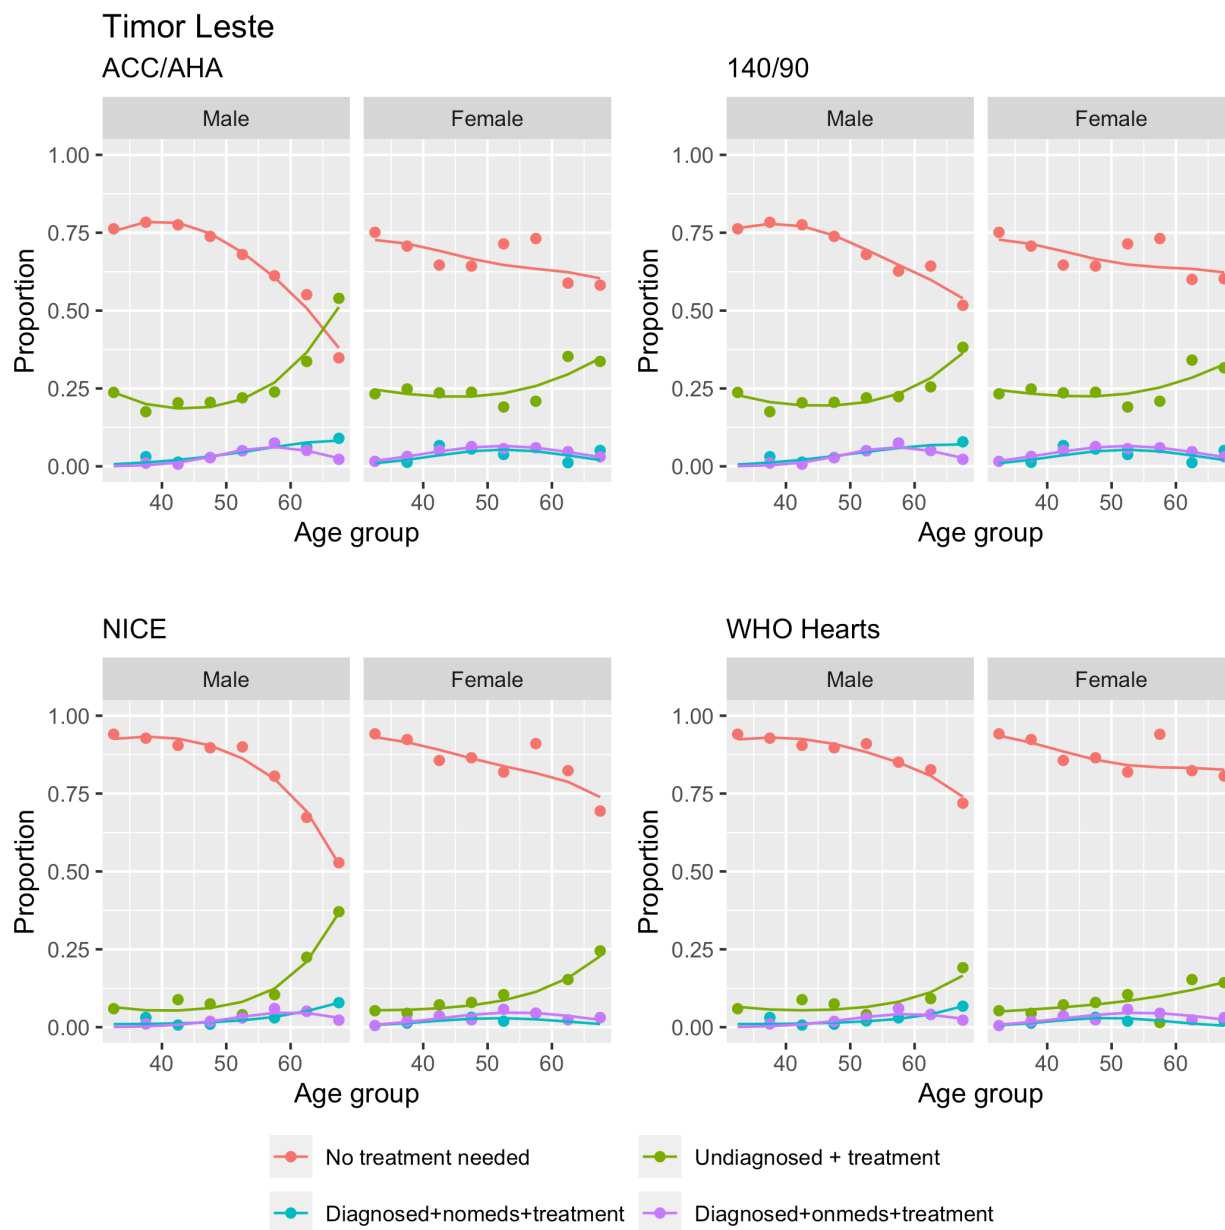

**Supplemental Figure XLIX:** Regression model fit of treatment need by age for Algeria. Lines are the model predicted proportions and the dots are the raw proportions by 5-year age group.

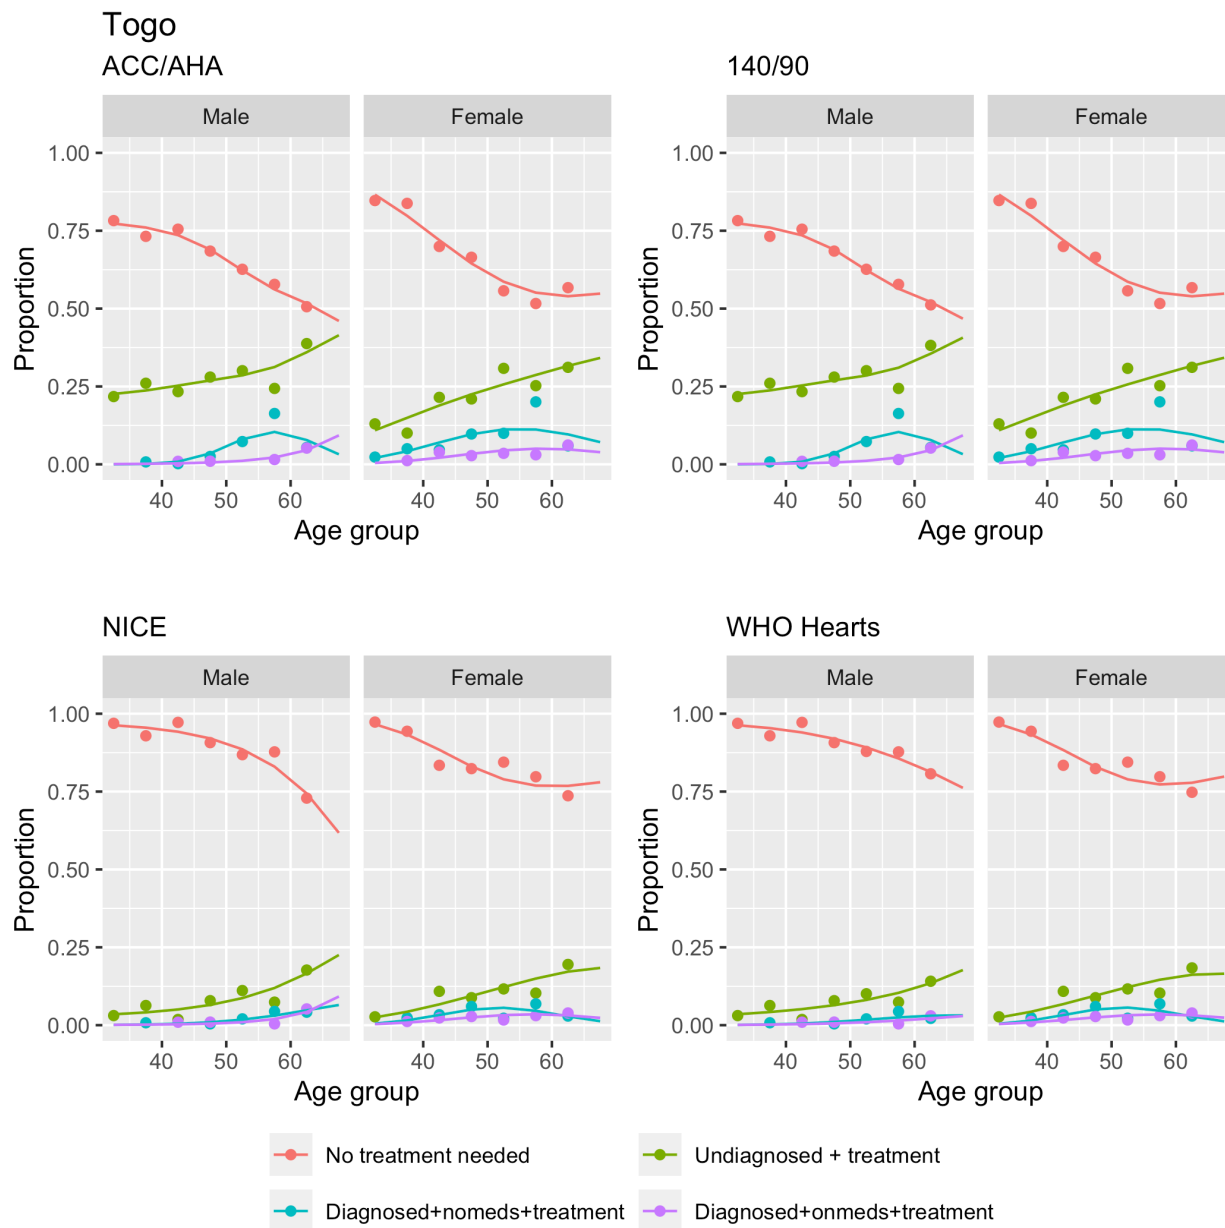

**Supplemental Figure L:** Regression model fit of treatment need by age for Togo. Lines are the model predicted proportions and the dots are the raw proportions by 5-year age group.

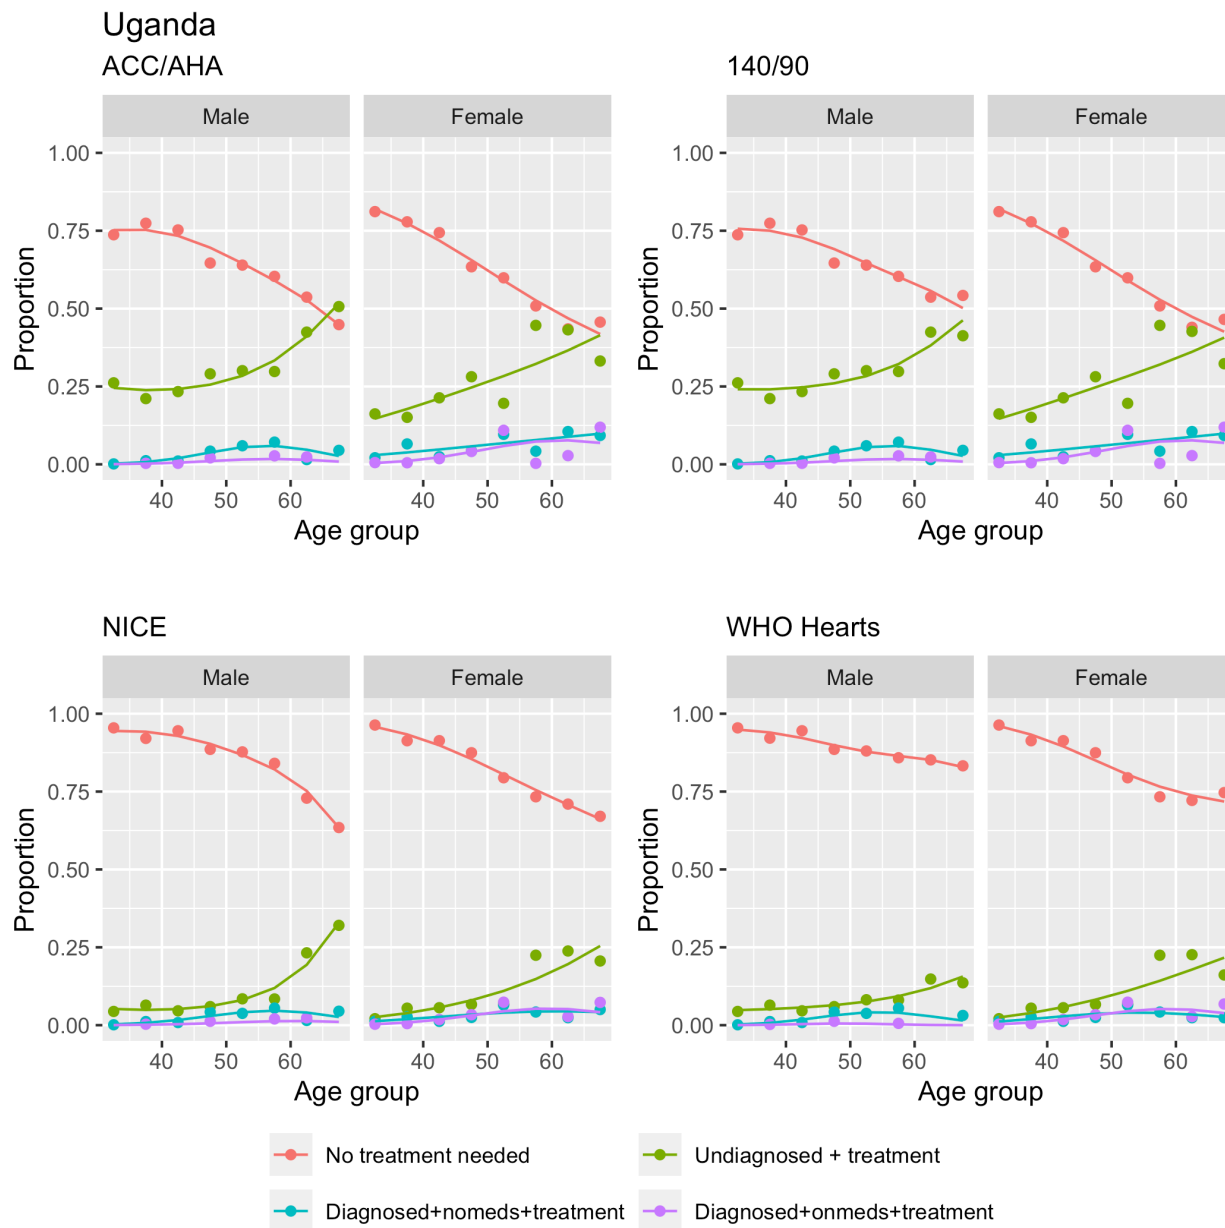

**Supplemental Figure LI:** Regression model fit of treatment need by age for Uganda. Lines are the model predicted proportions and the dots are the raw proportions by 5-year age group.

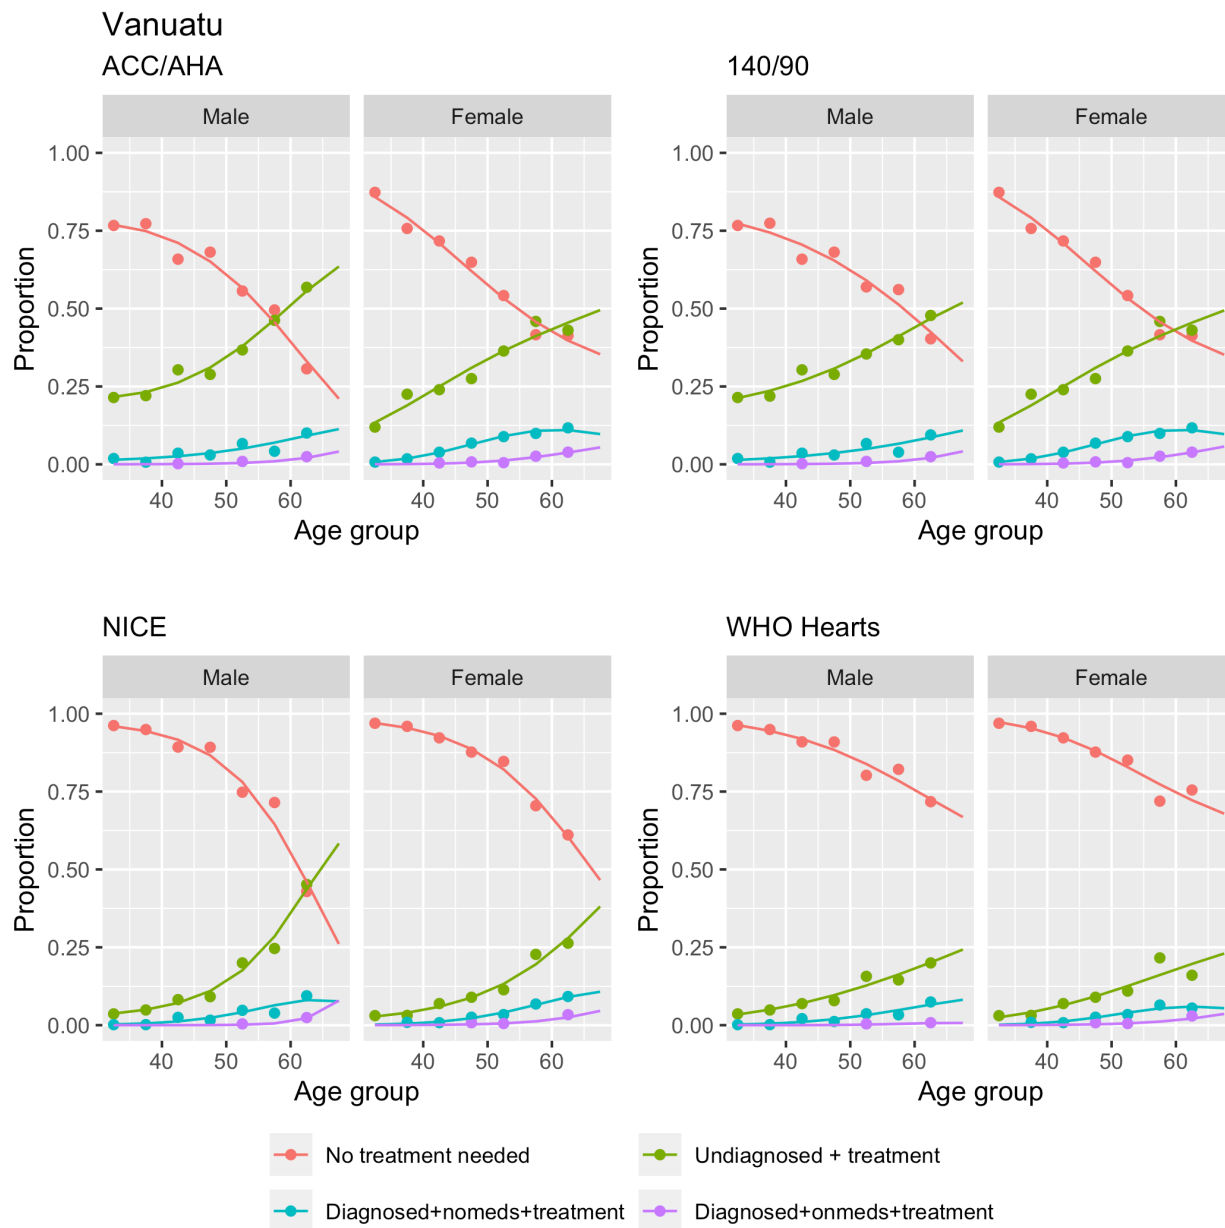

**Supplemental Figure LII:** Regression model fit of treatment need by age for Vanuatu. Lines are the model predicted proportions and the dots are the raw proportions by 5-year age group.

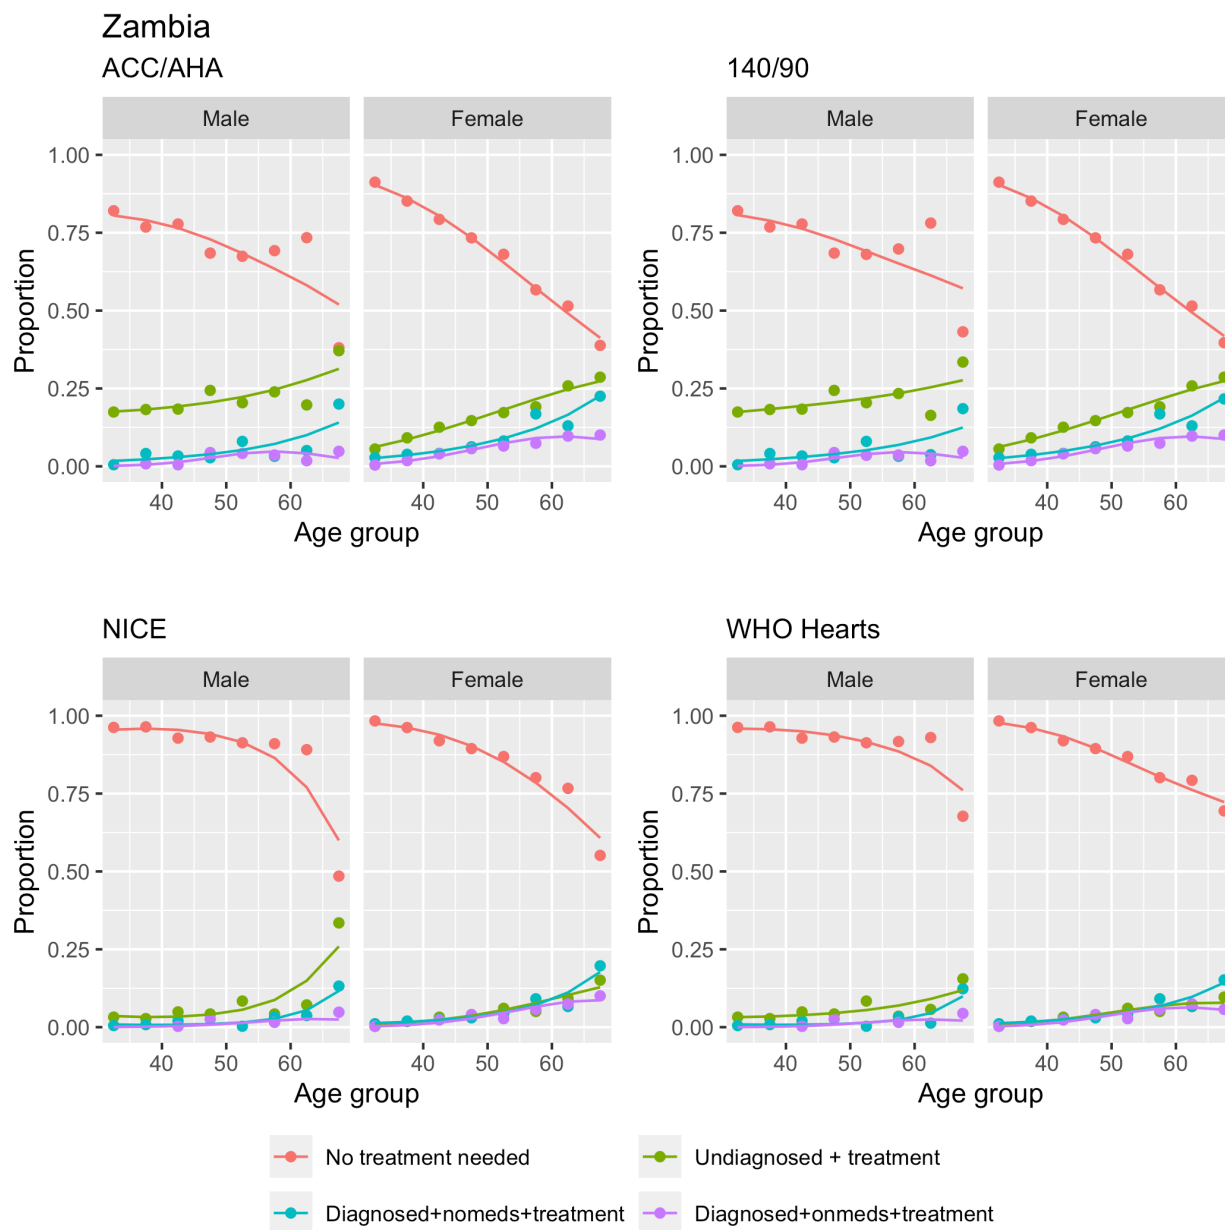

**Supplemental Figure LIII:** Regression model fit of treatment need by age for Zambia. Lines are the model predicted proportions and the dots are the raw proportions by 5-year age group.

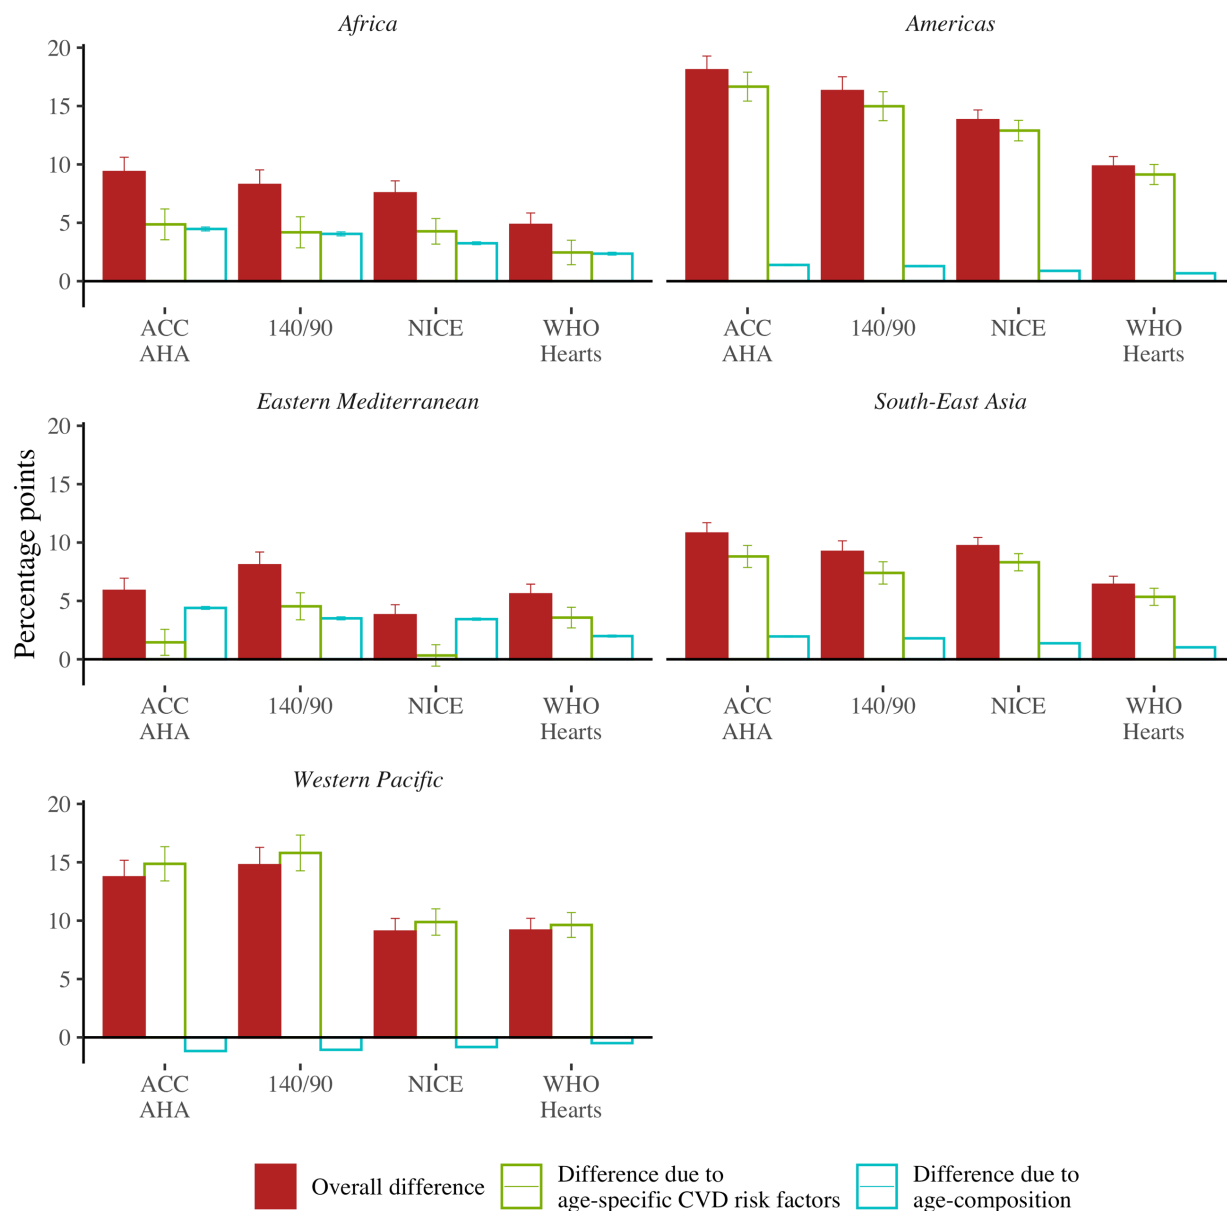

**Supplemental Figure LIV:** Kitagawa decomposition of the difference in the proportion of women in need of BP-lowering medicines between each World Health Organization world region and the European region. Error bars represent 95% confidence intervals.

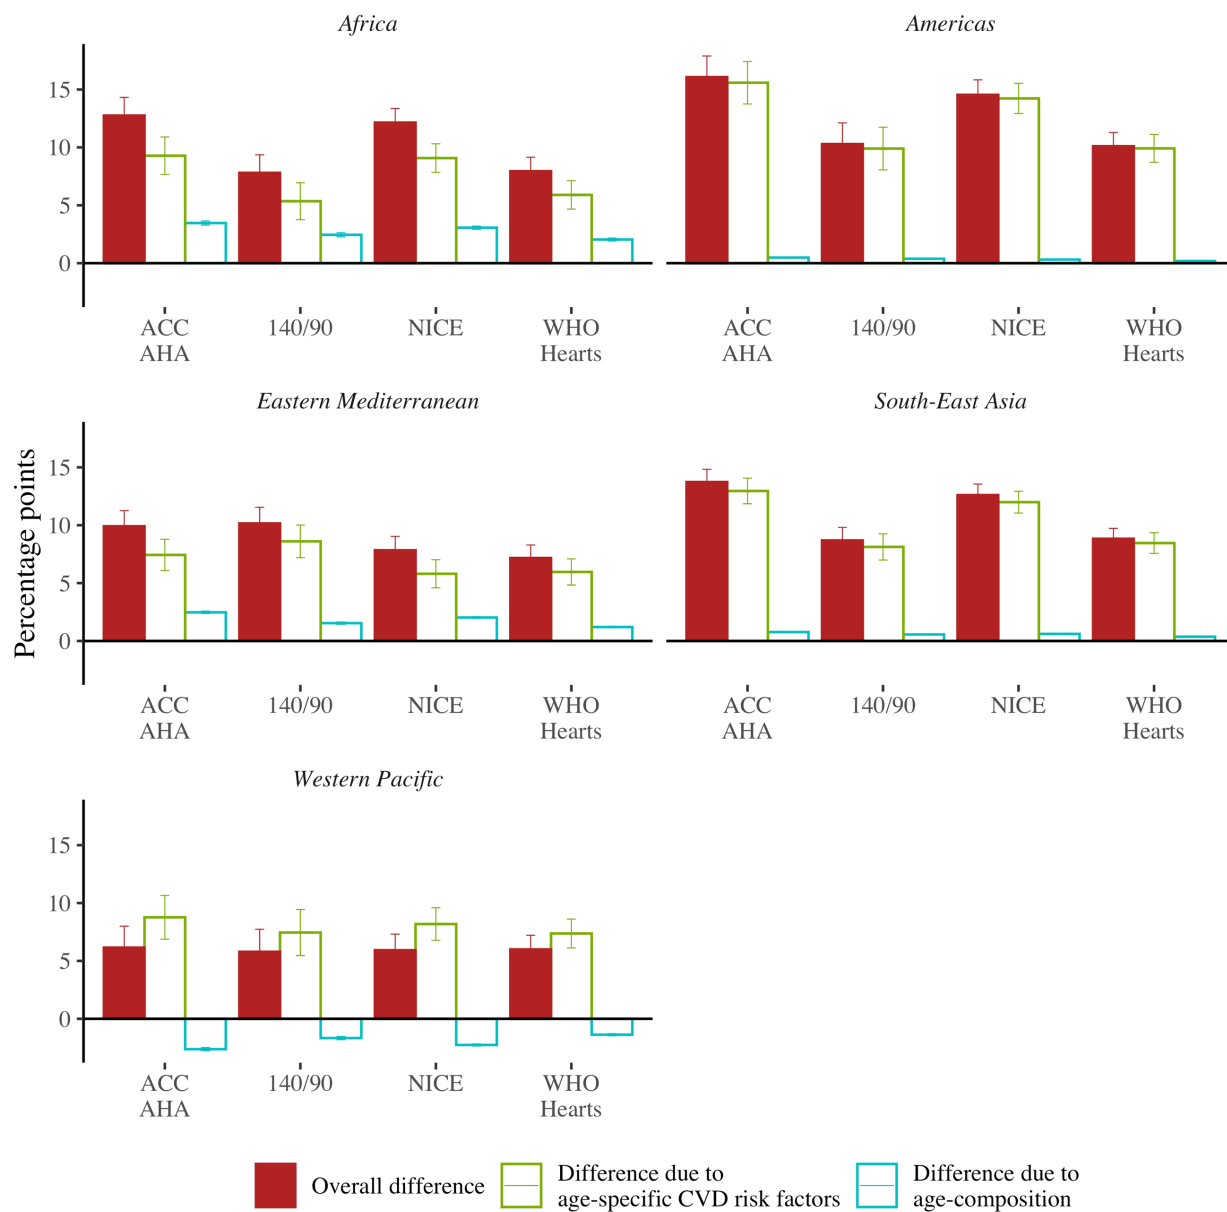

**Supplemental Figure LV:** Kitagawa decomposition of the difference in the proportion of men in need of BP-lowering medicines between each World Health Organization world region and the European region. Error bars represent 95% confidence intervals.
